# Supplementary material for: A novel histone H3K4me1-specific binding protein is required for siRNA accumulation and DNA methylation at a subset of loci targeted by RNA-directed DNA methylation
Source: Research Square preprint supplement (doi:10.21203/rs.3.rs-98860/v1), 2020-11-04
Supplement: Supplementary file 1 [file 37407829514572f5ee588eb2.xlsx]

## Sheet: Sheet1
Hypo			Hyper
rdm15	nrpd1	nrpe1	rdm15	nrpd1	nrpe1
chr1:18001-19000	chr1:17001-19000	chr1:17001-19000	chr1:2993501-2994000	chr1:2987001-2987500	chr1:2987001-2987500
chr1:500001-500500	chr1:44501-45000	chr1:44501-45000	chr1:10545001-10546000	chr1:2993501-2994000	chr1:2993501-2994000
chr1:540501-541000	chr1:55501-56500	chr1:55501-56500	chr1:13353501-13354000	chr1:7067001-7067500	chr1:4128001-4128500
chr1:587501-588000	chr1:77001-77500	chr1:77001-77500	chr1:13604501-13605500	chr1:7432001-7432500	chr1:6591501-6592000
chr1:634001-634500	chr1:256001-256500	chr1:256001-256500	chr1:13707501-13708000	chr1:7745001-7745500	chr1:7066001-7066500
chr1:696501-697500	chr1:257501-259000	chr1:257501-259000	chr1:14353501-14354000	chr1:8173501-8174000	chr1:7432001-7432500
chr1:759501-760000	chr1:372501-373000	chr1:372501-373000	chr1:14383501-14384000	chr1:8283001-8283500	chr1:7745001-7745500
chr1:792001-792500	chr1:424001-424500	chr1:424001-424500	chr1:14421501-14422000	chr1:8389001-8390500	chr1:7959501-7960000
chr1:889001-889500	chr1:431001-432000	chr1:431001-432500	chr1:14846501-14847000	chr1:8738001-8738500	chr1:8283001-8283500
chr1:1194501-1195000	chr1:433501-434000	chr1:433001-434000	chr1:15313001-15313500	chr1:8764501-8765000	chr1:8389001-8389500
chr1:1276001-1276500	chr1:499501-501500	chr1:499501-501500	chr1:15403001-15403500	chr1:8768501-8769000	chr1:8390001-8390500
chr1:1289001-1289500	chr1:512501-513500	chr1:512501-513500	chr1:19963001-19964000	chr1:8769501-8772000	chr1:8738001-8738500
chr1:1430501-1431000	chr1:540501-541000	chr1:540501-541000	chr1:21180501-21181000	chr1:8777501-8778000	chr1:9175501-9176000
chr1:1522501-1523500	chr1:549501-550500	chr1:549501-551000	chr1:21849001-21849500	chr1:8783001-8783500	chr1:10144501-10145000
chr1:1882001-1882500	chr1:587501-588000	chr1:587501-588000	chr1:24643001-24643500	chr1:8784001-8786000	chr1:10475501-10476000
chr1:1975001-1975500	chr1:634001-634500	chr1:634001-634500	chr1:25344001-25344500	chr1:8800001-8800500	chr1:10478001-10479000
chr1:1976001-1976500	chr1:639501-640000	chr1:640501-641500	chr1:25595501-25596000	chr1:8806501-8808500	chr1:10545001-10546000
chr1:2234001-2234500	chr1:641001-641500	chr1:670501-671000	chr2:1359501-1360500	chr1:8814001-8815000	chr1:11100501-11101000
chr1:2340001-2340500	chr1:670501-671000	chr1:696501-697500	chr2:14906501-14907000	chr1:8821001-8823000	chr1:11319001-11319500
chr1:2531501-2532000	chr1:696501-697500	chr1:758501-760500	chr3:129001-130500	chr1:8828501-8829000	chr1:11407001-11407500
chr1:2587501-2588500	chr1:758501-760500	chr1:781001-781500	chr3:11761001-11761500	chr1:8834001-8834500	chr1:11509501-11510000
chr1:2657501-2658000	chr1:781001-781500	chr1:782001-782500	chr3:13648501-13649000	chr1:8835001-8836500	chr1:12291501-12292500
chr1:3023501-3024000	chr1:782001-782500	chr1:785001-785500	chr3:15796001-15797000	chr1:8837001-8837500	chr1:12795501-12796000
chr1:3063501-3064000	chr1:785001-785500	chr1:792001-792500	chr3:18254501-18255000	chr1:9130001-9130500	chr1:12843501-12844000
chr1:3073501-3074500	chr1:792001-792500	chr1:822001-822500	chr3:20853501-20854000	chr1:9175501-9176000	chr1:12845001-12845500
chr1:3342501-3343000	chr1:822001-822500	chr1:889001-889500	chr4:2566501-2567000	chr1:10144501-10145000	chr1:12924001-12924500
chr1:3413501-3415000	chr1:889001-889500	chr1:944001-944500	chr4:2895501-2896000	chr1:10475501-10476000	chr1:13102501-13103000
chr1:3498001-3498500	chr1:1160001-1160500	chr1:958501-959000	chr4:6144501-6145000	chr1:10478001-10479000	chr1:13353501-13354000
chr1:3573001-3573500	chr1:1161001-1161500	chr1:1160001-1160500	chr4:7090001-7090500	chr1:10545001-10546000	chr1:13430001-13430500
chr1:3762501-3763000	chr1:1184501-1185500	chr1:1161001-1161500	chr5:9225001-9225500	chr1:10605001-10605500	chr1:13604501-13605500
chr1:3780501-3781000	chr1:1194501-1195500	chr1:1184501-1185500	chr5:10318501-10319000	chr1:12291501-12292500	chr1:13710501-13711000
chr1:3826501-3827500	chr1:1249501-1250000	chr1:1194001-1195500	chr5:13462001-13462500	chr1:12847001-12847500	chr1:13772501-13773000
chr1:3892001-3892500	chr1:1250501-1251000	chr1:1249501-1251000	chr5:13589001-13589500	chr1:13102501-13103000	chr1:14353501-14354000
chr1:3980001-3981000	chr1:1276001-1277000	chr1:1276001-1277000	chr5:13891001-13891500	chr1:13108501-13109000	chr1:14374001-14374500
chr1:4093001-4093500	chr1:1289001-1289500	chr1:1289001-1289500	chr5:15828501-15829000	chr1:13353501-13354500	chr1:14383501-14384000
chr1:4094001-4094500	chr1:1430001-1431000	chr1:1430001-1431000	chr5:21224001-21225000	chr1:13604501-13605500	chr1:14395001-14395500
chr1:4110501-4111500	chr1:1441501-1442000	chr1:1441501-1443000		chr1:13772001-13772500	chr1:14397501-14398000
chr1:4112001-4112500	chr1:1442501-1443000	chr1:1444001-1444500		chr1:15214001-15214500	chr1:14421501-14422000
chr1:4334001-4334500	chr1:1444001-1444500	chr1:1445501-1446000		chr1:16285001-16285500	chr1:14590001-14590500
chr1:4407501-4408000	chr1:1445501-1446000	chr1:1476501-1477000		chr1:17279501-17280000	chr1:14832501-14833000
chr1:4525001-4525500	chr1:1476501-1477000	chr1:1522501-1523500		chr1:17365501-17366000	chr1:14867501-14868000
chr1:4583001-4583500	chr1:1522501-1523500	chr1:1613001-1615000		chr1:17622001-17622500	chr1:14874501-14875000
chr1:4658001-4658500	chr1:1613001-1614000	chr1:1617501-1618000		chr1:17624001-17625000	chr1:15214001-15214500
chr1:4770501-4771000	chr1:1614501-1615000	chr1:1705501-1706500		chr1:20422501-20423000	chr1:15276501-15277000
chr1:4992501-4993000	chr1:1705501-1706500	chr1:1729001-1729500		chr1:20803001-20803500	chr1:15281001-15281500
chr1:5198501-5199000	chr1:1875501-1876500	chr1:1875501-1876500		chr1:21046501-21047000	chr1:15306001-15306500
chr1:5285001-5285500	chr1:1882001-1882500	chr1:1882001-1882500		chr1:21796001-21796500	chr1:15377001-15377500
chr1:5700001-5700500	chr1:1975001-1977000	chr1:1975001-1977000		chr1:21832501-21833000	chr1:15378501-15379000
chr1:5799001-5799500	chr1:2233501-2235000	chr1:2233501-2235000		chr1:21849001-21850000	chr1:15403501-15404500
chr1:5863001-5863500	chr1:2335001-2335500	chr1:2335001-2335500		chr1:23237501-23238500	chr1:16726501-16727000
chr1:5965501-5966000	chr1:2340001-2340500	chr1:2340001-2340500		chr1:23300001-23300500	chr1:16982001-16982500
chr1:5966501-5967000	chr1:2415501-2416000	chr1:2415501-2416000		chr1:23307501-23308000	chr1:17279501-17280000
chr1:6075001-6075500	chr1:2472501-2473500	chr1:2472501-2473500		chr1:23355001-23358000	chr1:17360501-17361000
chr1:6156501-6157000	chr1:2531501-2532000	chr1:2531501-2532000		chr1:23389501-23390000	chr1:17622001-17622500
chr1:6173001-6173500	chr1:2587001-2588500	chr1:2587001-2588500		chr1:24454501-24455000	chr1:17624001-17625000
chr1:6234001-6235500	chr1:2657501-2658000	chr1:2657501-2658000		chr1:24620001-24620500	chr1:18339501-18340000
chr1:6236501-6237000	chr1:2788501-2789000	chr1:2788501-2789000		chr1:24643001-24643500	chr1:18436001-18436500
chr1:6404501-6405500	chr1:2800501-2801000	chr1:2800501-2801000		chr1:24714501-24715000	chr1:19963001-19964000
chr1:6426001-6426500	chr1:2986501-2987000	chr1:2986501-2987000		chr1:25048501-25049000	chr1:20422501-20423000
chr1:6454501-6456000	chr1:3023501-3024500	chr1:3023501-3024500		chr1:25344001-25344500	chr1:21046001-21047000
chr1:6514501-6515000	chr1:3063501-3064000	chr1:3063501-3064000		chr1:25453001-25453500	chr1:21796501-21797000
chr1:6542001-6542500	chr1:3073001-3075000	chr1:3073001-3075000		chr1:25595501-25596000	chr1:21800001-21800500
chr1:6640501-6641000	chr1:3250501-3251500	chr1:3250501-3251500		chr1:25805001-25805500	chr1:21836001-21836500
chr1:6721501-6722500	chr1:3342501-3343000	chr1:3342501-3343500		chr1:27121001-27122000	chr1:21849001-21850000
chr1:6736501-6737000	chr1:3413001-3415000	chr1:3362001-3362500		chr1:27637001-27637500	chr1:23237501-23238500
chr1:6743001-6743500	chr1:3497501-3499000	chr1:3413001-3415000		chr2:1359501-1360500	chr1:24454501-24455000
chr1:6744001-6744500	chr1:3547001-3548000	chr1:3497501-3499000		chr2:1803001-1804000	chr1:24620001-24620500
chr1:6906001-6906500	chr1:3552001-3552500	chr1:3546501-3548000		chr2:1823501-1824000	chr1:24643001-24643500
chr1:7035501-7036500	chr1:3573001-3573500	chr1:3551501-3552500		chr2:2019001-2019500	chr1:24738501-24739000
chr1:7132501-7133000	chr1:3762001-3763000	chr1:3573001-3573500		chr2:2026501-2027000	chr1:25344001-25344500
chr1:7241001-7241500	chr1:3771001-3772000	chr1:3762001-3763000		chr2:2056001-2056500	chr1:25452501-25453500
chr1:7282001-7282500	chr1:3780501-3781500	chr1:3771001-3772000		chr2:2939001-2939500	chr1:25595501-25596000
chr1:7283501-7284000	chr1:3785001-3786000	chr1:3780501-3782000		chr2:3092501-3093000	chr1:25676501-25677000
chr1:7393001-7393500	chr1:3825501-3827500	chr1:3785001-3786000		chr2:3109501-3110000	chr1:27121501-27122000
chr1:7717501-7718000	chr1:3892001-3892500	chr1:3825501-3827500		chr2:3110501-3111000	chr2:796001-796500
chr1:7722001-7722500	chr1:3925501-3926500	chr1:3892001-3892500		chr2:3547001-3547500	chr2:1359501-1360500
chr1:7725501-7726000	chr1:3933001-3933500	chr1:3897501-3898000		chr2:3869001-3869500	chr2:1798501-1799000
chr1:7761001-7761500	chr1:3980001-3981000	chr1:3925501-3926500		chr2:4501001-4501500	chr2:1803001-1804000
chr1:7766001-7766500	chr1:4093001-4094500	chr1:3933001-3933500		chr2:4643501-4644000	chr2:1954001-1954500
chr1:7787501-7788000	chr1:4110001-4113000	chr1:3980001-3981000		chr2:4733501-4734000	chr2:2026501-2027000
chr1:7833501-7834000	chr1:4209001-4209500	chr1:4093001-4094500		chr2:5100001-5100500	chr2:2056001-2056500
chr1:7935501-7936000	chr1:4334001-4334500	chr1:4110001-4113000		chr2:5182501-5183000	chr2:2461001-2461500
chr1:7936501-7937000	chr1:4405501-4406500	chr1:4209001-4209500		chr2:5289501-5290000	chr2:3092501-3093000
chr1:7961001-7961500	chr1:4407001-4408500	chr1:4334001-4334500		chr2:5290501-5291000	chr2:3109501-3110000
chr1:7976001-7976500	chr1:4409001-4411500	chr1:4405501-4411500		chr2:5456501-5457000	chr2:3110501-3111000
chr1:7985001-7985500	chr1:4415501-4416000	chr1:4525001-4525500		chr2:6507501-6508000	chr2:3869001-3869500
chr1:7986001-7986500	chr1:4525001-4525500	chr1:4583001-4583500		chr2:8382001-8382500	chr2:4501001-4501500
chr1:8115501-8116000	chr1:4583001-4583500	chr1:4658001-4658500		chr2:9265501-9266000	chr2:4559001-4559500
chr1:8169501-8170000	chr1:4658001-4658500	chr1:4685501-4686000		chr2:11812501-11813000	chr2:4634001-4634500
chr1:8190001-8190500	chr1:4770001-4771000	chr1:4770001-4771000		chr2:12736501-12737000	chr2:4643501-4644000
chr1:8205001-8205500	chr1:4785501-4787000	chr1:4785501-4787500		chr2:13235001-13235500	chr2:4648501-4649000
chr1:8236001-8236500	chr1:4860001-4860500	chr1:4896501-4897000		chr2:14522501-14523500	chr2:4733501-4734000
chr1:8277001-8277500	chr1:4896501-4897000	chr1:4966501-4967000		chr2:14525001-14525500	chr2:5022001-5022500
chr1:8290001-8291000	chr1:4966501-4967000	chr1:4992501-4993000		chr2:14906501-14907500	chr2:5100001-5100500
chr1:8472001-8472500	chr1:5056001-5056500	chr1:5056001-5056500		chr2:15140001-15140500	chr2:5289501-5290000
chr1:8488501-8489000	chr1:5098001-5099000	chr1:5098001-5099500		chr2:15680001-15680500	chr2:5290501-5291000
chr1:8538501-8539000	chr1:5101501-5102000	chr1:5101501-5102000		chr2:16537501-16538000	chr2:5456501-5457000
chr1:8723001-8723500	chr1:5198501-5199000	chr1:5198501-5199000		chr2:16571001-16571500	chr2:6507501-6508000
chr1:8767001-8767500	chr1:5285001-5285500	chr1:5285001-5285500		chr2:17407501-17408000	chr2:6848001-6848500
chr1:8778001-8778500	chr1:5391501-5393000	chr1:5391501-5392000		chr2:17499501-17500500	chr2:8381501-8382500
chr1:8800501-8801000	chr1:5437001-5438000	chr1:5392501-5393000		chr3:129001-130500	chr2:9265501-9266000
chr1:8812501-8813000	chr1:5531001-5532000	chr1:5437001-5438000		chr3:932501-933000	chr2:10814501-10815000
chr1:8815001-8815500	chr1:5657501-5659500	chr1:5531001-5532000		chr3:1555501-1556000	chr2:11714001-11715000
chr1:9062001-9062500	chr1:5700001-5702000	chr1:5657501-5659500		chr3:1963501-1965500	chr2:12284501-12285000
chr1:9082501-9083000	chr1:5798501-5799500	chr1:5681501-5682000		chr3:1969001-1970500	chr2:12736501-12737000
chr1:9137001-9137500	chr1:5863001-5863500	chr1:5700001-5702000		chr3:2888001-2888500	chr2:13235001-13235500
chr1:9177501-9178000	chr1:5899001-5900000	chr1:5798501-5799500		chr3:2889501-2890000	chr2:14473001-14473500
chr1:9384501-9385000	chr1:5911501-5912000	chr1:5863001-5863500		chr3:4278001-4278500	chr2:14525001-14525500
chr1:9418001-9418500	chr1:5965501-5967000	chr1:5899001-5900000		chr3:4283001-4283500	chr2:14906501-14907500
chr1:9626501-9627000	chr1:5975001-5975500	chr1:5911501-5912000		chr3:4284501-4285000	chr2:15410501-15411000
chr1:9691001-9691500	chr1:6074501-6075500	chr1:5958501-5959000		chr3:4285501-4286000	chr2:15680001-15680500
chr1:9754501-9756500	chr1:6102501-6103000	chr1:5965501-5966500		chr3:4359001-4359500	chr2:15919501-15920000
chr1:9778001-9778500	chr1:6123001-6123500	chr1:5975001-5975500		chr3:4647501-4648000	chr2:17497501-17498000
chr1:9812001-9812500	chr1:6141001-6141500	chr1:6074501-6075500		chr3:4929501-4930000	chr2:17499501-17500500
chr1:9817501-9818000	chr1:6156501-6157500	chr1:6102501-6103000		chr3:7805501-7806000	chr3:29001-29500
chr1:9866001-9866500	chr1:6158001-6159000	chr1:6123001-6123500		chr3:8371001-8371500	chr3:129001-130500
chr1:10013001-10013500	chr1:6173001-6173500	chr1:6141001-6141500		chr3:8411001-8411500	chr3:1555501-1556000
chr1:10021501-10022000	chr1:6196501-6199500	chr1:6156501-6157500		chr3:9378501-9379000	chr3:1560501-1561000
chr1:10206501-10207000	chr1:6218501-6219500	chr1:6158001-6159000		chr3:9438001-9438500	chr3:4277501-4279000
chr1:10330001-10330500	chr1:6234001-6235500	chr1:6173001-6173500		chr3:10372501-10373000	chr3:4280501-4281000
chr1:10421001-10421500	chr1:6236501-6237000	chr1:6196501-6197500		chr3:10395501-10396000	chr3:4282501-4283500
chr1:10506501-10507000	chr1:6237501-6238000	chr1:6198001-6199500		chr3:10634501-10635000	chr3:4284501-4286500
chr1:10526001-10526500	chr1:6263001-6263500	chr1:6218501-6219500		chr3:11412501-11413000	chr3:4647501-4648000
chr1:10528501-10529000	chr1:6273501-6274000	chr1:6234001-6235500		chr3:11486001-11486500	chr3:4929501-4930000
chr1:10568501-10569000	chr1:6302501-6303000	chr1:6236501-6237000		chr3:11591001-11591500	chr3:5730001-5730500
chr1:10570001-10570500	chr1:6403001-6405500	chr1:6237501-6238000		chr3:11593001-11593500	chr3:7225501-7226000
chr1:10624001-10624500	chr1:6426001-6426500	chr1:6273501-6274000		chr3:11676001-11676500	chr3:7804501-7805000
chr1:10652501-10653000	chr1:6454501-6456000	chr1:6403001-6405500		chr3:12227501-12228000	chr3:8256001-8256500
chr1:10802501-10803000	chr1:6473001-6473500	chr1:6426001-6426500		chr3:12779001-12779500	chr3:8371001-8371500
chr1:11019501-11020000	chr1:6514501-6515500	chr1:6454501-6456000		chr3:13830001-13830500	chr3:8411001-8412000
chr1:11051001-11051500	chr1:6538001-6542500	chr1:6473001-6473500		chr3:14254001-14254500	chr3:9378501-9379000
chr1:11103501-11104000	chr1:6543001-6543500	chr1:6514501-6515500		chr3:14865501-14866000	chr3:10394501-10395000
chr1:11153501-11154000	chr1:6574501-6575500	chr1:6538001-6543500		chr3:15422001-15422500	chr3:10395501-10396000
chr1:11155001-11155500	chr1:6593001-6594000	chr1:6574501-6575500		chr3:15597501-15598000	chr3:10930501-10931000
chr1:11174501-11175000	chr1:6640501-6641000	chr1:6593001-6594000		chr3:15796001-15797000	chr3:11412501-11413000
chr1:11286501-11287000	chr1:6704001-6705000	chr1:6640501-6641000		chr3:16159001-16161000	chr3:11486001-11486500
chr1:11298501-11299000	chr1:6705501-6706000	chr1:6704001-6707000		chr3:18254501-18255000	chr3:11591001-11591500
chr1:11351501-11352500	chr1:6707501-6708000	chr1:6707501-6709500		chr3:22746501-22747000	chr3:11593001-11593500
chr1:11422001-11422500	chr1:6709001-6709500	chr1:6715001-6716000		chr4:1690501-1691000	chr3:11676001-11676500
chr1:11428001-11428500	chr1:6715001-6716000	chr1:6718001-6718500		chr4:1767001-1767500	chr3:11761001-11761500
chr1:11550501-11551000	chr1:6720501-6721000	chr1:6720501-6721000		chr4:1843001-1843500	chr3:12004501-12005000
chr1:11620501-11621000	chr1:6721501-6723000	chr1:6721501-6723000		chr4:2317001-2317500	chr3:12227501-12228000
chr1:11649501-11650000	chr1:6736001-6737500	chr1:6736001-6737500		chr4:4973501-4974000	chr3:12779001-12779500
chr1:11706501-11707000	chr1:6743001-6743500	chr1:6743001-6743500		chr4:5565001-5565500	chr3:12987501-12988000
chr1:11711501-11712000	chr1:6744001-6744500	chr1:6744001-6744500		chr4:5568001-5568500	chr3:13383001-13383500
chr1:11732501-11733000	chr1:6759501-6760000	chr1:6759501-6760000		chr4:5765001-5765500	chr3:13407001-13407500
chr1:11736001-11736500	chr1:6906001-6906500	chr1:6906001-6906500		chr4:5965501-5966000	chr3:13634001-13634500
chr1:11737001-11737500	chr1:7023501-7024000	chr1:7023501-7024000		chr4:6057001-6057500	chr3:14254001-14254500
chr1:11803501-11804000	chr1:7035501-7037500	chr1:7035501-7037500		chr4:6144001-6145000	chr3:14875001-14875500
chr1:11817501-11818000	chr1:7077501-7078000	chr1:7077501-7078000		chr4:6205501-6206000	chr3:15422001-15422500
chr1:12012501-12013000	chr1:7132501-7133000	chr1:7132501-7133000		chr4:7800501-7801000	chr3:15597501-15598000
chr1:12077001-12077500	chr1:7138501-7139000	chr1:7138501-7139000		chr4:8147001-8147500	chr3:15767501-15768000
chr1:12079501-12080000	chr1:7227501-7228000	chr1:7227501-7228000		chr4:9503501-9504000	chr3:15796001-15796500
chr1:12084001-12084500	chr1:7241001-7241500	chr1:7241001-7241500		chr4:10991001-10991500	chr3:15847001-15847500
chr1:12097501-12098000	chr1:7255001-7256000	chr1:7255001-7256000		chr4:11208501-11209000	chr3:16160501-16161000
chr1:12142501-12143000	chr1:7281501-7282500	chr1:7256501-7257000		chr4:11209501-11210500	chr3:16249001-16249500
chr1:12183501-12184000	chr1:7283001-7284000	chr1:7281501-7282500		chr4:11383501-11384500	chr3:16526501-16527500
chr1:12240501-12241000	chr1:7344001-7344500	chr1:7283001-7284000		chr4:11829001-11829500	chr3:18446501-18447000
chr1:12365001-12365500	chr1:7364501-7365000	chr1:7344001-7344500		chr4:11832501-11833000	chr3:20202001-20202500
chr1:12457501-12458000	chr1:7365501-7366000	chr1:7353001-7353500		chr4:11845001-11845500	chr3:20203001-20203500
chr1:12483001-12483500	chr1:7392001-7393500	chr1:7364501-7365000		chr4:13580501-13581000	chr3:22746501-22747000
chr1:12564001-12564500	chr1:7665501-7666000	chr1:7365501-7366000		chr4:14850001-14850500	chr3:22748001-22748500
chr1:12854001-12854500	chr1:7714501-7715000	chr1:7392001-7393500		chr4:14979501-14980000	chr4:520001-520500
chr1:12866501-12867000	chr1:7717001-7718500	chr1:7394501-7395000		chr5:135501-136000	chr4:1315501-1316000
chr1:12895001-12895500	chr1:7722001-7722500	chr1:7541001-7541500		chr5:596501-597000	chr4:1690501-1691000
chr1:12993001-12993500	chr1:7725001-7726000	chr1:7665501-7666000		chr5:839001-839500	chr4:1767001-1767500
chr1:13016501-13017000	chr1:7761001-7762000	chr1:7714501-7715000		chr5:872501-873000	chr4:1871001-1871500
chr1:13059501-13060000	chr1:7783501-7784000	chr1:7717001-7719000		chr5:1488501-1489000	chr4:1976501-1977000
chr1:13088001-13088500	chr1:7787501-7788000	chr1:7722001-7722500		chr5:2107501-2108000	chr4:3753001-3753500
chr1:13106501-13107000	chr1:7833001-7834500	chr1:7725001-7726000		chr5:2374001-2374500	chr4:4105001-4105500
chr1:13230501-13231000	chr1:7936501-7937000	chr1:7761001-7762500		chr5:2393001-2393500	chr4:4963501-4964000
chr1:13357001-13357500	chr1:7960501-7961500	chr1:7766001-7766500		chr5:3910501-3911000	chr4:4973501-4974000
chr1:13572001-13572500	chr1:7976001-7976500	chr1:7783501-7784000		chr5:6403001-6403500	chr4:5084501-5085000
chr1:13699001-13700000	chr1:7985001-7985500	chr1:7787501-7788000		chr5:8081501-8082000	chr4:5311001-5312000
chr1:14013001-14013500	chr1:7986001-7986500	chr1:7833001-7834500		chr5:8622501-8623000	chr4:5361001-5361500
chr1:14164001-14164500	chr1:8114501-8117000	chr1:7852001-7852500		chr5:10145001-10145500	chr4:5567501-5568500
chr1:14296501-14297000	chr1:8169501-8170500	chr1:7936501-7937000		chr5:10318501-10319000	chr4:5735001-5735500
chr1:14297501-14298000	chr1:8190001-8190500	chr1:7960501-7961500		chr5:10358001-10359500	chr4:5773501-5774000
chr1:14399001-14399500	chr1:8204501-8205500	chr1:7976001-7976500		chr5:10930001-10930500	chr4:6057001-6058000
chr1:15219001-15219500	chr1:8235501-8237000	chr1:7985001-7985500		chr5:12075501-12076000	chr4:6144001-6145000
chr1:15279001-15279500	chr1:8238501-8239000	chr1:7986001-7986500		chr5:12105001-12105500	chr4:6205501-6206000
chr1:15300501-15301000	chr1:8267001-8267500	chr1:8053501-8054000		chr5:13287501-13288000	chr4:6467501-6468000
chr1:15304001-15304500	chr1:8272501-8273000	chr1:8115001-8117000		chr5:13589001-13590000	chr4:7538001-7538500
chr1:15410001-15410500	chr1:8276501-8278000	chr1:8169501-8170500		chr5:13834501-13835000	chr4:9173001-9173500
chr1:15415501-15416000	chr1:8278501-8279000	chr1:8190001-8190500		chr5:13891001-13891500	chr4:9486501-9487000
chr1:15935501-15936000	chr1:8289501-8291500	chr1:8201001-8201500		chr5:14086501-14087000	chr4:9503501-9504000
chr1:16286501-16287000	chr1:8319501-8320000	chr1:8204501-8205500		chr5:14088001-14088500	chr4:11049001-11049500
chr1:16398001-16398500	chr1:8392001-8392500	chr1:8235501-8237000		chr5:15618001-15618500	chr4:11061001-11061500
chr1:16413501-16414000	chr1:8457001-8457500	chr1:8238501-8239000		chr5:15828501-15829000	chr4:11062001-11062500
chr1:16418501-16419000	chr1:8471501-8473500	chr1:8267001-8267500		chr5:17827001-17827500	chr4:11067001-11067500
chr1:16477501-16478000	chr1:8488001-8490500	chr1:8272501-8273000		chr5:18929501-18930000	chr4:11071001-11071500
chr1:16659501-16660000	chr1:8495001-8495500	chr1:8277001-8278500		chr5:18932501-18933000	chr4:11080001-11080500
chr1:16710001-16710500	chr1:8538501-8540000	chr1:8289501-8291500		chr5:19060501-19061000	chr4:11082501-11083000
chr1:16711501-16712000	chr1:8573001-8573500	chr1:8319501-8320000		chr5:19407501-19408000	chr4:11208501-11209000
chr1:16712501-16713000	chr1:8577001-8578000	chr1:8374501-8375000		chr5:21224001-21225000	chr4:11209501-11210500
chr1:16905001-16905500	chr1:8622501-8623500	chr1:8392001-8392500		chr5:23362501-23363000	chr4:11829001-11829500
chr1:16939001-16939500	chr1:8645001-8645500	chr1:8471501-8473500		chr5:24022501-24023000	chr4:11845001-11846500
chr1:17006501-17007500	chr1:8682001-8682500	chr1:8488001-8490500		chr5:25198501-25199000	chr4:13580501-13581000
chr1:17102001-17102500	chr1:8690001-8691500	chr1:8495001-8495500			chr4:14162501-14163000
chr1:17152501-17153000	chr1:8723001-8723500	chr1:8538501-8540000			chr4:14850001-14850500
chr1:17267001-17267500	chr1:8766501-8767500	chr1:8573001-8573500			chr4:14979501-14980000
chr1:17289001-17289500	chr1:8775001-8776000	chr1:8577001-8578000			chr5:135501-136000
chr1:17295001-17295500	chr1:8778501-8779000	chr1:8622501-8623500			chr5:179501-180000
chr1:17335501-17336000	chr1:8781001-8782000	chr1:8682001-8682500			chr5:596501-597000
chr1:17382001-17382500	chr1:8789501-8790500	chr1:8690001-8691000			chr5:1488501-1489000
chr1:17448501-17449000	chr1:8792501-8793000	chr1:8723001-8723500			chr5:2107501-2108000
chr1:17490501-17491000	chr1:8794001-8795000	chr1:8767001-8767500			chr5:2393001-2393500
chr1:17551001-17551500	chr1:8798001-8798500	chr1:8775501-8776000			chr5:3910501-3911000
chr1:17605501-17606000	chr1:8801001-8801500	chr1:8781001-8782000			chr5:5853501-5854000
chr1:17632501-17633000	chr1:8803501-8804500	chr1:8789501-8790500			chr5:6252501-6253000
chr1:17685501-17686000	chr1:8812001-8813000	chr1:8794501-8795000			chr5:6403001-6403500
chr1:17689501-17690000	chr1:8815001-8816000	chr1:8798001-8798500			chr5:8081501-8082000
chr1:17709501-17710000	chr1:8818001-8818500	chr1:8800501-8801500			chr5:8622501-8623000
chr1:17727001-17727500	chr1:8826501-8827000	chr1:8802501-8803000			chr5:9871001-9871500
chr1:17759001-17759500	chr1:8829501-8830500	chr1:8803501-8804500			chr5:9904501-9905000
chr1:17831001-17831500	chr1:8832501-8833000	chr1:8812501-8813000			chr5:10139501-10140000
chr1:17840501-17841000	chr1:8869501-8870000	chr1:8815001-8815500			chr5:10157501-10158000
chr1:18047501-18048000	chr1:8870501-8871000	chr1:8818001-8818500			chr5:10318501-10319000
chr1:18111001-18111500	chr1:8927501-8928000	chr1:8826501-8827500			chr5:10358001-10359500
chr1:18214001-18214500	chr1:9004501-9005500	chr1:8829501-8830000			chr5:10930001-10930500
chr1:18270501-18271000	chr1:9062001-9062500	chr1:8832501-8833000			chr5:11052001-11052500
chr1:18297501-18298000	chr1:9082501-9083000	chr1:8869501-8871000			chr5:12012501-12013000
chr1:18320501-18321000	chr1:9136001-9137500	chr1:8927501-8928000			chr5:12105001-12105500
chr1:18380001-18380500	chr1:9138001-9138500	chr1:9004501-9005500			chr5:12145001-12145500
chr1:18386501-18387000	chr1:9174001-9174500	chr1:9062001-9062500			chr5:12767501-12768000
chr1:18457501-18458000	chr1:9175001-9175500	chr1:9082501-9083000			chr5:13285501-13286000
chr1:18493501-18494000	chr1:9177501-9178000	chr1:9136001-9138500			chr5:13287501-13288000
chr1:18599001-18599500	chr1:9187501-9188000	chr1:9174001-9174500			chr5:13588501-13590000
chr1:18632001-18633000	chr1:9204001-9204500	chr1:9175001-9175500			chr5:13834501-13835000
chr1:18633501-18634000	chr1:9205001-9205500	chr1:9177501-9178000			chr5:13891001-13891500
chr1:18791001-18791500	chr1:9236001-9237500	chr1:9187501-9188000			chr5:14085001-14085500
chr1:18804501-18805000	chr1:9305001-9306000	chr1:9204001-9205000			chr5:14086501-14088500
chr1:18895001-18895500	chr1:9357501-9358000	chr1:9236001-9237500			chr5:14702001-14702500
chr1:18931001-18931500	chr1:9373001-9374000	chr1:9305001-9306000			chr5:17827001-17827500
chr1:19027001-19027500	chr1:9384001-9385000	chr1:9357501-9358000			chr5:18929501-18930000
chr1:19063001-19064000	chr1:9418001-9418500	chr1:9373501-9374000			chr5:18932501-18933000
chr1:19085501-19086000	chr1:9550501-9551000	chr1:9384001-9385000			chr5:19407501-19408000
chr1:19086501-19087000	chr1:9572501-9573000	chr1:9418001-9418500			chr5:19891501-19892000
chr1:19172001-19172500	chr1:9573501-9574000	chr1:9547501-9548000			chr5:21224001-21225000
chr1:19304001-19304500	chr1:9587001-9587500	chr1:9573501-9574000			chr5:21926501-21927000
chr1:19354001-19354500	chr1:9626501-9627000	chr1:9582501-9583000			chr5:24022501-24023000
chr1:19374501-19375000	chr1:9676501-9677000	chr1:9587001-9588000
chr1:19428501-19429000	chr1:9690501-9691500	chr1:9626501-9627000
chr1:19430001-19430500	chr1:9706501-9707000	chr1:9676501-9677000
chr1:19465001-19465500	chr1:9707501-9708000	chr1:9690501-9691500
chr1:19700501-19701000	chr1:9746501-9747000	chr1:9706501-9707000
chr1:19741501-19742000	chr1:9754501-9756500	chr1:9707501-9708000
chr1:19744001-19744500	chr1:9762501-9763000	chr1:9746501-9747000
chr1:19768501-19769000	chr1:9778001-9778500	chr1:9754501-9756500
chr1:19780501-19781000	chr1:9811501-9812500	chr1:9762501-9763000
chr1:19994001-19995000	chr1:9816501-9818500	chr1:9778001-9778500
chr1:20024001-20024500	chr1:9836501-9837000	chr1:9811501-9812500
chr1:20032501-20033000	chr1:9862501-9863500	chr1:9816501-9818500
chr1:20106501-20107000	chr1:9865501-9867500	chr1:9836501-9837000
chr1:20205501-20206000	chr1:9915501-9916500	chr1:9852501-9853000
chr1:20206501-20207000	chr1:9918501-9919500	chr1:9862501-9863500
chr1:20208001-20208500	chr1:9925501-9926500	chr1:9865501-9867500
chr1:20403501-20404000	chr1:9939001-9940000	chr1:9915501-9916500
chr1:20433001-20433500	chr1:10008001-10008500	chr1:9918501-9919500
chr1:20489501-20490000	chr1:10013001-10013500	chr1:9925501-9926500
chr1:20509001-20509500	chr1:10021501-10022000	chr1:9939001-9940000
chr1:20520501-20521000	chr1:10060501-10061000	chr1:10008001-10008500
chr1:20525001-20525500	chr1:10152501-10153000	chr1:10013001-10013500
chr1:20622501-20623000	chr1:10156001-10157000	chr1:10021501-10022500
chr1:20625001-20625500	chr1:10159001-10159500	chr1:10060501-10061000
chr1:20683501-20684000	chr1:10206501-10207000	chr1:10152501-10153000
chr1:20734001-20734500	chr1:10221001-10221500	chr1:10155501-10156000
chr1:20820001-20820500	chr1:10239001-10240000	chr1:10156501-10157000
chr1:20914001-20914500	chr1:10314501-10315000	chr1:10159001-10159500
chr1:21210001-21210500	chr1:10330001-10330500	chr1:10206501-10207000
chr1:21211001-21211500	chr1:10347001-10347500	chr1:10221001-10221500
chr1:21228501-21229000	chr1:10348001-10348500	chr1:10222001-10222500
chr1:21260001-21260500	chr1:10349001-10349500	chr1:10239001-10240000
chr1:21341501-21342500	chr1:10357001-10357500	chr1:10314501-10315500
chr1:21392501-21393000	chr1:10490501-10491000	chr1:10330001-10330500
chr1:21428001-21428500	chr1:10497501-10498000	chr1:10347001-10347500
chr1:21470001-21470500	chr1:10506501-10507500	chr1:10348001-10348500
chr1:21471001-21471500	chr1:10512501-10513000	chr1:10349001-10349500
chr1:21507501-21508000	chr1:10526001-10527500	chr1:10357001-10357500
chr1:21525001-21525500	chr1:10528501-10529000	chr1:10421001-10421500
chr1:21529001-21530000	chr1:10529501-10530000	chr1:10490501-10491000
chr1:21602001-21602500	chr1:10554501-10555000	chr1:10497501-10498000
chr1:21637501-21638000	chr1:10568001-10569000	chr1:10506501-10507000
chr1:21681501-21682000	chr1:10570001-10570500	chr1:10512501-10513000
chr1:21744501-21745000	chr1:10579001-10580000	chr1:10526001-10527500
chr1:21802501-21803000	chr1:10591501-10592500	chr1:10528501-10529000
chr1:21823001-21823500	chr1:10597501-10598500	chr1:10554501-10555000
chr1:21918501-21919000	chr1:10623501-10624500	chr1:10568001-10569000
chr1:22089001-22089500	chr1:10652501-10653000	chr1:10570001-10570500
chr1:22107001-22107500	chr1:10654501-10655000	chr1:10579001-10580500
chr1:22112501-22113000	chr1:10801001-10801500	chr1:10591501-10592500
chr1:22167501-22168000	chr1:10802501-10803500	chr1:10595001-10595500
chr1:22192001-22192500	chr1:10853001-10853500	chr1:10597501-10598500
chr1:22224501-22225000	chr1:10867001-10867500	chr1:10604501-10605000
chr1:22261001-22261500	chr1:10915001-10916000	chr1:10623501-10624500
chr1:22443501-22444000	chr1:10922501-10923500	chr1:10652501-10653000
chr1:22542001-22542500	chr1:10924501-10925000	chr1:10654501-10655000
chr1:22621501-22622000	chr1:10929001-10929500	chr1:10801001-10801500
chr1:22694001-22694500	chr1:10931001-10931500	chr1:10802501-10803500
chr1:22732001-22732500	chr1:10983001-10983500	chr1:10814001-10814500
chr1:22828501-22829500	chr1:11006001-11006500	chr1:10852501-10853500
chr1:22872001-22872500	chr1:11019501-11020000	chr1:10867001-10867500
chr1:22888001-22888500	chr1:11032001-11032500	chr1:10915501-10916000
chr1:22993001-22993500	chr1:11046001-11046500	chr1:10923001-10924000
chr1:23068001-23068500	chr1:11049001-11049500	chr1:10924501-10925000
chr1:23152501-23153000	chr1:11051001-11051500	chr1:10929001-10929500
chr1:23174501-23175000	chr1:11089001-11089500	chr1:10931001-10931500
chr1:23197501-23198000	chr1:11103501-11104000	chr1:10982501-10983500
chr1:23214001-23214500	chr1:11117501-11118000	chr1:11006001-11007000
chr1:23240001-23240500	chr1:11129001-11129500	chr1:11019501-11020000
chr1:23247001-23247500	chr1:11132001-11132500	chr1:11032001-11032500
chr1:23280501-23281000	chr1:11153501-11154000	chr1:11046001-11046500
chr1:23297001-23297500	chr1:11155001-11156500	chr1:11049001-11049500
chr1:23312501-23313000	chr1:11174001-11175000	chr1:11051001-11051500
chr1:23554001-23554500	chr1:11228501-11229000	chr1:11089001-11089500
chr1:23651501-23652000	chr1:11241501-11242000	chr1:11103501-11104000
chr1:23723501-23724000	chr1:11259001-11260000	chr1:11117501-11118000
chr1:23755001-23755500	chr1:11277001-11277500	chr1:11129001-11129500
chr1:23940501-23941000	chr1:11287501-11288000	chr1:11131501-11132500
chr1:24082001-24083000	chr1:11298501-11299500	chr1:11153501-11154000
chr1:24385001-24385500	chr1:11301001-11302000	chr1:11155001-11156000
chr1:24572001-24573000	chr1:11325001-11325500	chr1:11174001-11175000
chr1:24645501-24646000	chr1:11351501-11352500	chr1:11228501-11229000
chr1:24705001-24706000	chr1:11378001-11378500	chr1:11241501-11242000
chr1:24718501-24719000	chr1:11385001-11385500	chr1:11259001-11260000
chr1:24741001-24741500	chr1:11409001-11410500	chr1:11277001-11277500
chr1:24745001-24745500	chr1:11422001-11422500	chr1:11286501-11287000
chr1:24772001-24773000	chr1:11428001-11428500	chr1:11287501-11288000
chr1:24776501-24777000	chr1:11490001-11491000	chr1:11298501-11299500
chr1:24877001-24877500	chr1:11517501-11518000	chr1:11301001-11302000
chr1:24908501-24909000	chr1:11522001-11522500	chr1:11325001-11325500
chr1:24917501-24918500	chr1:11526001-11526500	chr1:11351501-11352500
chr1:25033501-25034000	chr1:11550501-11551000	chr1:11378001-11378500
chr1:25057501-25058000	chr1:11552001-11552500	chr1:11409501-11410500
chr1:25098001-25099000	chr1:11586001-11586500	chr1:11422001-11422500
chr1:25159001-25159500	chr1:11609501-11611000	chr1:11428001-11428500
chr1:25358001-25358500	chr1:11620501-11621000	chr1:11490001-11491000
chr1:25400501-25401500	chr1:11632001-11632500	chr1:11493001-11493500
chr1:25594501-25595000	chr1:11636501-11637500	chr1:11517501-11518000
chr1:25641501-25642000	chr1:11644001-11644500	chr1:11521501-11522500
chr1:25660001-25660500	chr1:11648001-11648500	chr1:11526001-11526500
chr1:25696501-25697000	chr1:11649001-11650000	chr1:11536501-11537000
chr1:25722501-25723000	chr1:11661001-11661500	chr1:11550501-11551000
chr1:25730001-25730500	chr1:11666501-11667000	chr1:11552001-11552500
chr1:25779501-25780000	chr1:11669001-11670000	chr1:11564501-11565000
chr1:25976501-25977000	chr1:11692501-11693500	chr1:11586001-11586500
chr1:26140001-26140500	chr1:11700001-11702000	chr1:11610001-11610500
chr1:26169501-26171000	chr1:11704501-11705000	chr1:11620501-11621000
chr1:26196501-26197000	chr1:11706501-11707500	chr1:11632001-11632500
chr1:26307001-26307500	chr1:11708001-11708500	chr1:11636501-11637500
chr1:26510501-26511000	chr1:11710501-11712000	chr1:11644001-11645000
chr1:26551501-26552000	chr1:11720501-11721500	chr1:11648001-11650000
chr1:26779501-26780000	chr1:11722001-11722500	chr1:11661001-11662500
chr1:27860501-27861000	chr1:11732501-11733000	chr1:11666501-11667000
chr1:27932501-27933000	chr1:11735501-11737500	chr1:11669001-11670000
chr1:28105501-28106000	chr1:11740501-11741000	chr1:11692501-11693500
chr1:28161501-28162000	chr1:11752001-11753000	chr1:11700001-11702000
chr1:28312001-28312500	chr1:11753501-11755000	chr1:11706501-11707500
chr1:28397501-28398000	chr1:11782501-11783500	chr1:11708001-11708500
chr1:28515001-28516500	chr1:11803501-11804500	chr1:11710501-11712000
chr1:28703001-28703500	chr1:11806001-11806500	chr1:11720501-11722500
chr1:28785501-28786000	chr1:11807501-11808000	chr1:11732501-11733000
chr1:28891501-28892000	chr1:11817501-11819000	chr1:11735501-11737500
chr1:29078501-29079000	chr1:11822001-11822500	chr1:11740501-11741000
chr1:29244001-29244500	chr1:11834501-11835000	chr1:11752001-11753000
chr1:29319501-29320000	chr1:11835501-11836000	chr1:11754001-11755000
chr1:29337001-29337500	chr1:11859501-11860000	chr1:11782501-11783500
chr1:29377001-29377500	chr1:11880001-11880500	chr1:11803501-11804500
chr1:29611501-29612000	chr1:11892001-11892500	chr1:11806001-11806500
chr1:30200001-30200500	chr1:11901501-11902000	chr1:11807501-11808000
chr1:30251001-30251500	chr1:11930501-11931000	chr1:11817501-11818000
chr1:30254001-30254500	chr1:11960501-11961000	chr1:11818501-11819000
chr1:30255001-30255500	chr1:11981001-11981500	chr1:11822001-11822500
chr1:30427501-30428000	chr1:11988001-11988500	chr1:11832001-11832500
chr2:122001-122500	chr1:11992001-11992500	chr1:11834501-11835000
chr2:152001-153000	chr1:12012501-12013000	chr1:11835501-11836000
chr2:289001-289500	chr1:12041001-12041500	chr1:11859501-11860000
chr2:292501-293000	chr1:12050001-12050500	chr1:11880001-11880500
chr2:303001-303500	chr1:12077001-12077500	chr1:11887001-11887500
chr2:305501-306000	chr1:12079501-12081000	chr1:11892001-11892500
chr2:314501-315000	chr1:12084001-12084500	chr1:11895501-11896500
chr2:416001-416500	chr1:12097001-12098000	chr1:11901501-11902000
chr2:500501-501000	chr1:12136501-12137000	chr1:11930501-11931000
chr2:501501-502000	chr1:12137501-12138000	chr1:11935001-11935500
chr2:560001-560500	chr1:12138501-12139000	chr1:11960501-11961000
chr2:637001-637500	chr1:12142501-12143500	chr1:11981001-11981500
chr2:686501-687000	chr1:12166501-12167000	chr1:11988001-11988500
chr2:856501-857000	chr1:12183501-12184000	chr1:11992001-11992500
chr2:905001-905500	chr1:12218501-12219000	chr1:12009001-12010000
chr2:909501-910000	chr1:12231001-12231500	chr1:12012501-12013500
chr2:919501-920000	chr1:12240501-12241000	chr1:12041001-12041500
chr2:1027501-1028000	chr1:12263001-12263500	chr1:12050001-12050500
chr2:1038501-1039000	chr1:12286501-12287500	chr1:12062001-12062500
chr2:1049001-1049500	chr1:12303001-12303500	chr1:12063001-12063500
chr2:1050001-1050500	chr1:12328001-12330000	chr1:12077001-12077500
chr2:1065501-1066000	chr1:12336501-12337000	chr1:12079501-12081000
chr2:1111501-1112000	chr1:12337501-12338000	chr1:12084001-12084500
chr2:1178501-1179000	chr1:12364501-12366000	chr1:12097001-12098000
chr2:1190001-1190500	chr1:12387501-12388000	chr1:12136501-12137000
chr2:1246501-1247000	chr1:12457501-12458500	chr1:12137501-12138000
chr2:1383501-1384000	chr1:12469001-12469500	chr1:12138501-12139000
chr2:1465501-1466000	chr1:12477001-12478000	chr1:12142501-12143000
chr2:1562501-1563000	chr1:12483001-12483500	chr1:12183501-12184000
chr2:1731501-1732000	chr1:12500501-12501000	chr1:12218501-12219000
chr2:1756501-1757000	chr1:12517001-12517500	chr1:12231001-12231500
chr2:1821501-1822000	chr1:12525501-12526000	chr1:12240501-12241000
chr2:1822501-1823000	chr1:12530001-12530500	chr1:12263001-12263500
chr2:1902501-1903000	chr1:12562001-12563500	chr1:12286501-12287500
chr2:1912501-1913000	chr1:12564001-12564500	chr1:12303001-12303500
chr2:2141001-2141500	chr1:12565501-12566000	chr1:12328001-12330000
chr2:2155501-2156000	chr1:12590501-12591000	chr1:12336501-12337000
chr2:2232001-2232500	chr1:12592501-12594000	chr1:12337501-12338000
chr2:2260501-2261000	chr1:12594501-12595000	chr1:12364501-12366000
chr2:2362501-2363000	chr1:12603501-12604000	chr1:12387501-12388000
chr2:2518501-2519000	chr1:12618501-12619500	chr1:12425001-12425500
chr2:2844001-2844500	chr1:12635501-12636000	chr1:12435001-12435500
chr2:2985001-2985500	chr1:12662501-12663000	chr1:12457501-12458500
chr2:3516501-3517000	chr1:12684501-12685000	chr1:12477001-12478000
chr2:3642001-3642500	chr1:12691501-12693000	chr1:12483001-12483500
chr2:4024501-4025000	chr1:12730001-12730500	chr1:12500501-12501000
chr2:4353501-4354000	chr1:12733501-12734500	chr1:12517001-12517500
chr2:4472001-4472500	chr1:12761001-12761500	chr1:12525501-12526000
chr2:4473501-4474000	chr1:12818001-12818500	chr1:12530001-12530500
chr2:4476001-4476500	chr1:12846001-12846500	chr1:12555501-12556000
chr2:5119501-5120000	chr1:12854001-12856000	chr1:12562001-12563500
chr2:5598501-5599000	chr1:12862501-12863000	chr1:12564001-12564500
chr2:5648001-5648500	chr1:12866501-12867000	chr1:12565501-12566000
chr2:5791501-5792000	chr1:12873501-12874000	chr1:12574501-12575000
chr2:5871501-5872000	chr1:12875501-12877000	chr1:12576001-12576500
chr2:5874001-5874500	chr1:12888001-12888500	chr1:12590501-12592000
chr2:5905501-5906000	chr1:12894501-12895500	chr1:12592501-12594000
chr2:5940001-5940500	chr1:12896001-12896500	chr1:12594501-12595000
chr2:6015501-6016000	chr1:12906001-12908000	chr1:12603501-12604000
chr2:6044001-6044500	chr1:12918501-12919000	chr1:12618501-12619000
chr2:6084501-6085000	chr1:12959501-12960000	chr1:12640501-12641000
chr2:6162501-6163000	chr1:12980001-12980500	chr1:12645001-12645500
chr2:6317001-6317500	chr1:12993001-12993500	chr1:12662501-12663000
chr2:6391501-6392000	chr1:12995001-12995500	chr1:12684501-12685000
chr2:6397501-6398000	chr1:13016501-13017500	chr1:12692001-12693000
chr2:6666001-6666500	chr1:13028001-13028500	chr1:12730001-12730500
chr2:6677501-6678000	chr1:13030001-13030500	chr1:12733001-12734500
chr2:6733001-6733500	chr1:13057001-13057500	chr1:12738001-12738500
chr2:6790501-6791000	chr1:13059001-13060500	chr1:12739501-12740000
chr2:6803501-6804000	chr1:13065001-13065500	chr1:12761001-12762000
chr2:6813001-6813500	chr1:13070501-13071000	chr1:12809501-12810000
chr2:6892001-6892500	chr1:13075501-13076000	chr1:12818001-12818500
chr2:6900501-6901000	chr1:13088001-13088500	chr1:12846001-12847000
chr2:6922501-6923000	chr1:13106501-13107000	chr1:12854001-12856000
chr2:6946001-6946500	chr1:13128001-13128500	chr1:12862501-12863000
chr2:6948501-6949000	chr1:13130001-13130500	chr1:12866501-12867000
chr2:7056501-7057000	chr1:13150001-13150500	chr1:12873501-12874000
chr2:7080501-7081000	chr1:13151001-13151500	chr1:12875501-12877000
chr2:7094001-7094500	chr1:13152001-13153000	chr1:12894501-12896500
chr2:7153501-7154000	chr1:13156001-13156500	chr1:12900501-12901000
chr2:7155501-7156000	chr1:13162501-13163000	chr1:12904001-12904500
chr2:7161001-7161500	chr1:13165001-13165500	chr1:12906001-12908500
chr2:7193501-7194000	chr1:13166001-13166500	chr1:12916001-12916500
chr2:7246501-7247000	chr1:13167001-13167500	chr1:12918501-12919000
chr2:7295001-7295500	chr1:13192001-13192500	chr1:12942001-12942500
chr2:7340501-7341000	chr1:13213001-13213500	chr1:12959501-12960000
chr2:7536001-7536500	chr1:13215001-13216000	chr1:12993001-12993500
chr2:7721501-7722000	chr1:13220001-13220500	chr1:12995001-12995500
chr2:7766501-7767000	chr1:13230501-13231000	chr1:13016001-13017500
chr2:7814001-7815000	chr1:13236001-13236500	chr1:13028001-13028500
chr2:7875001-7875500	chr1:13241001-13241500	chr1:13030001-13030500
chr2:7889501-7890000	chr1:13250501-13251000	chr1:13039001-13039500
chr2:7956001-7956500	chr1:13257001-13257500	chr1:13057001-13057500
chr2:8009001-8009500	chr1:13259001-13261000	chr1:13059001-13060500
chr2:8017501-8018000	chr1:13263001-13263500	chr1:13065001-13065500
chr2:8061501-8062000	chr1:13287501-13288000	chr1:13070501-13071000
chr2:8077501-8078000	chr1:13288501-13289000	chr1:13075501-13076000
chr2:8102501-8103500	chr1:13310001-13310500	chr1:13086501-13087500
chr2:8201001-8201500	chr1:13313501-13314000	chr1:13088001-13088500
chr2:8236501-8237000	chr1:13357001-13357500	chr1:13106501-13107000
chr2:8251501-8252000	chr1:13487001-13487500	chr1:13126501-13127000
chr2:8302501-8303000	chr1:13495501-13496000	chr1:13128001-13128500
chr2:8333001-8333500	chr1:13497501-13498000	chr1:13130001-13130500
chr2:8569501-8570000	chr1:13508501-13509000	chr1:13151001-13151500
chr2:8578501-8579000	chr1:13515001-13515500	chr1:13152001-13153000
chr2:8622501-8623000	chr1:13544501-13545500	chr1:13156001-13156500
chr2:8641501-8642000	chr1:13549501-13550000	chr1:13165001-13165500
chr2:8658001-8658500	chr1:13567001-13567500	chr1:13166001-13166500
chr2:8885001-8885500	chr1:13572001-13572500	chr1:13167001-13167500
chr2:8907501-8908000	chr1:13591501-13592000	chr1:13173001-13173500
chr2:8911001-8911500	chr1:13666501-13667500	chr1:13192001-13192500
chr2:8915501-8916000	chr1:13669001-13669500	chr1:13199501-13200000
chr2:9063001-9063500	chr1:13675001-13675500	chr1:13215001-13216000
chr2:9079501-9080000	chr1:13686501-13687000	chr1:13219501-13220500
chr2:9195001-9195500	chr1:13699001-13699500	chr1:13230501-13231000
chr2:9225501-9226000	chr1:13704001-13704500	chr1:13236001-13236500
chr2:9314001-9314500	chr1:13728001-13728500	chr1:13241001-13242000
chr2:9330501-9331000	chr1:13811001-13811500	chr1:13257001-13257500
chr2:9425001-9425500	chr1:13812501-13813000	chr1:13259001-13261000
chr2:9432001-9432500	chr1:13837501-13838000	chr1:13287501-13288000
chr2:9456001-9456500	chr1:13850501-13851000	chr1:13290501-13291000
chr2:9485001-9485500	chr1:13852001-13852500	chr1:13313501-13314000
chr2:9633501-9634000	chr1:13883501-13884000	chr1:13356001-13357500
chr2:9635001-9635500	chr1:13902001-13902500	chr1:13360501-13361000
chr2:9656001-9656500	chr1:13905001-13905500	chr1:13371501-13372000
chr2:9897001-9897500	chr1:13906001-13907000	chr1:13438501-13439000
chr2:10001501-10002000	chr1:13979501-13980000	chr1:13449001-13449500
chr2:10037501-10038000	chr1:13999001-13999500	chr1:13487001-13487500
chr2:10070001-10071000	chr1:14005001-14005500	chr1:13495501-13496000
chr2:10194501-10195000	chr1:14008501-14009000	chr1:13497501-13498000
chr2:10239001-10239500	chr1:14013001-14014000	chr1:13515001-13515500
chr2:10255501-10256000	chr1:14031001-14031500	chr1:13528501-13529000
chr2:10289501-10290000	chr1:14146501-14147000	chr1:13544501-13545500
chr2:10318001-10318500	chr1:14154501-14155000	chr1:13549501-13550000
chr2:10351501-10352000	chr1:14164001-14165000	chr1:13565501-13566500
chr2:10437001-10437500	chr1:14188001-14188500	chr1:13567001-13567500
chr2:10465501-10466000	chr1:14192001-14192500	chr1:13572001-13572500
chr2:10566001-10566500	chr1:14296501-14297000	chr1:13573001-13573500
chr2:10683501-10684000	chr1:14297501-14299500	chr1:13582001-13582500
chr2:10687001-10687500	chr1:14662501-14663000	chr1:13584501-13585500
chr2:10797001-10797500	chr1:14673501-14674000	chr1:13586001-13586500
chr2:10842001-10842500	chr1:14828501-14829000	chr1:13640001-13640500
chr2:10909001-10909500	chr1:15019001-15019500	chr1:13659001-13660500
chr2:10932001-10932500	chr1:15219001-15219500	chr1:13666501-13667500
chr2:10973001-10973500	chr1:15300501-15301000	chr1:13668001-13668500
chr2:10996001-10997000	chr1:15415001-15415500	chr1:13669001-13669500
chr2:11107501-11108000	chr1:15610001-15611000	chr1:13686501-13687000
chr2:11177001-11177500	chr1:15664501-15665000	chr1:13699001-13700000
chr2:11285501-11286500	chr1:15760501-15761000	chr1:13704001-13704500
chr2:11308501-11309000	chr1:15799501-15800000	chr1:13811001-13811500
chr2:11346501-11347000	chr1:15886501-15887000	chr1:13812501-13813000
chr2:11502501-11503000	chr1:15902501-15903000	chr1:13837501-13838000
chr2:11544501-11545000	chr1:15935501-15936000	chr1:13850501-13851000
chr2:11597501-11598000	chr1:15940001-15940500	chr1:13852001-13852500
chr2:11649001-11649500	chr1:15945001-15945500	chr1:13883001-13884000
chr2:11721501-11722000	chr1:15984001-15984500	chr1:13890001-13890500
chr2:11920501-11921000	chr1:16013001-16013500	chr1:13896001-13896500
chr2:11953001-11953500	chr1:16116501-16117000	chr1:13902001-13902500
chr2:11964501-11965000	chr1:16245501-16246500	chr1:13904501-13905500
chr2:11983501-11984000	chr1:16252501-16253500	chr1:13906501-13907000
chr2:12092501-12094000	chr1:16259001-16260000	chr1:13979501-13980000
chr2:12310001-12310500	chr1:16262001-16262500	chr1:14005001-14005500
chr2:12554001-12554500	chr1:16286501-16287500	chr1:14008501-14009000
chr2:12622501-12623000	chr1:16291001-16291500	chr1:14011501-14012000
chr2:12708501-12709000	chr1:16294001-16294500	chr1:14013001-14014000
chr2:12725001-12725500	chr1:16298501-16299500	chr1:14030501-14031500
chr2:12740001-12740500	chr1:16303001-16303500	chr1:14146501-14147000
chr2:12802001-12802500	chr1:16305001-16305500	chr1:14154501-14155000
chr2:12809501-12810000	chr1:16306501-16307000	chr1:14164001-14165000
chr2:12812501-12813000	chr1:16341001-16341500	chr1:14165501-14166000
chr2:12887001-12887500	chr1:16352501-16353000	chr1:14186001-14186500
chr2:13065501-13066000	chr1:16360501-16361500	chr1:14188001-14188500
chr2:13102001-13102500	chr1:16362501-16363000	chr1:14192001-14192500
chr2:13127001-13127500	chr1:16380501-16381000	chr1:14296501-14297000
chr2:13223001-13223500	chr1:16387001-16387500	chr1:14297501-14298000
chr2:13227501-13228000	chr1:16394001-16394500	chr1:14298501-14299500
chr2:13267501-13268000	chr1:16396001-16396500	chr1:14309001-14309500
chr2:13300001-13300500	chr1:16400501-16401000	chr1:14662501-14663000
chr2:13336501-13337500	chr1:16418501-16419500	chr1:14823001-14823500
chr2:13338001-13338500	chr1:16421001-16421500	chr1:14831001-14831500
chr2:13374501-13375500	chr1:16432501-16433500	chr1:14909001-14909500
chr2:13433001-13433500	chr1:16455001-16455500	chr1:15019001-15019500
chr2:13560001-13560500	chr1:16477001-16478000	chr1:15219001-15219500
chr2:13634001-13635000	chr1:16488501-16489000	chr1:15300501-15301000
chr2:13661001-13661500	chr1:16498001-16498500	chr1:15415001-15415500
chr2:13717001-13717500	chr1:16538501-16539000	chr1:15610001-15611000
chr2:13793501-13794000	chr1:16562001-16562500	chr1:15760501-15761000
chr2:13886001-13886500	chr1:16592501-16593500	chr1:15799501-15800000
chr2:14063501-14064000	chr1:16594001-16595000	chr1:15886501-15887000
chr2:14290501-14291000	chr1:16598001-16598500	chr1:15935501-15936000
chr2:14311501-14312000	chr1:16613001-16613500	chr1:15940001-15940500
chr2:14335001-14335500	chr1:16624501-16625000	chr1:15945001-15945500
chr2:14386501-14387000	chr1:16625501-16626000	chr1:15984001-15984500
chr2:14405501-14406000	chr1:16637001-16637500	chr1:16004501-16005000
chr2:14417001-14417500	chr1:16641001-16641500	chr1:16013001-16013500
chr2:14458001-14458500	chr1:16645501-16646000	chr1:16116501-16117000
chr2:14572501-14573000	chr1:16659501-16660000	chr1:16142001-16142500
chr2:14952501-14953000	chr1:16710001-16710500	chr1:16158001-16158500
chr2:15110001-15110500	chr1:16711501-16712000	chr1:16245501-16246500
chr2:15134001-15135000	chr1:16712501-16713000	chr1:16253001-16253500
chr2:15140501-15141000	chr1:16722001-16722500	chr1:16259501-16260000
chr2:15567501-15568000	chr1:16723501-16724000	chr1:16286501-16287500
chr2:16150501-16151000	chr1:16737501-16738500	chr1:16291001-16291500
chr2:16302501-16303000	chr1:16773501-16774000	chr1:16294001-16295000
chr2:16379501-16380000	chr1:16778501-16779000	chr1:16298501-16299500
chr2:16380501-16381000	chr1:16790501-16791000	chr1:16303001-16303500
chr2:16467001-16467500	chr1:16791501-16792500	chr1:16305001-16305500
chr2:16556001-16556500	chr1:16793501-16794000	chr1:16306501-16307000
chr2:16560501-16561000	chr1:16807501-16808000	chr1:16341001-16341500
chr2:16603501-16604000	chr1:16810501-16811000	chr1:16352501-16353000
chr2:16798501-16799000	chr1:16815501-16816500	chr1:16360501-16361000
chr2:16876001-16876500	chr1:16825001-16826500	chr1:16363001-16363500
chr2:16952501-16953000	chr1:16841001-16841500	chr1:16367501-16368000
chr2:17253001-17254000	chr1:16844001-16844500	chr1:16380501-16381000
chr2:17254501-17255000	chr1:16858501-16859000	chr1:16394001-16394500
chr2:17300001-17300500	chr1:16860501-16861000	chr1:16396001-16396500
chr2:17363501-17364000	chr1:16870501-16871000	chr1:16400501-16401000
chr2:17488501-17489000	chr1:16889501-16891000	chr1:16403501-16404000
chr2:17904501-17905000	chr1:16904501-16905500	chr1:16418501-16419500
chr2:17992501-17993000	chr1:16923001-16923500	chr1:16421001-16421500
chr2:18093001-18093500	chr1:16930001-16930500	chr1:16431001-16432000
chr2:18353501-18354000	chr1:16936501-16937000	chr1:16432501-16433500
chr2:18655501-18656000	chr1:16938001-16938500	chr1:16455001-16455500
chr2:18702501-18703000	chr1:16939001-16939500	chr1:16460001-16460500
chr2:19143501-19144000	chr1:16962001-16963000	chr1:16477001-16478000
chr2:19172001-19172500	chr1:16966001-16967000	chr1:16488501-16489000
chr2:19195501-19196000	chr1:16967501-16968500	chr1:16498001-16498500
chr2:19196501-19197000	chr1:16975001-16975500	chr1:16534001-16534500
chr2:19235501-19236000	chr1:16988001-16989000	chr1:16536001-16536500
chr2:19322501-19323500	chr1:16997501-16998500	chr1:16548001-16548500
chr2:19414001-19414500	chr1:17006501-17007500	chr1:16562001-16562500
chr2:19528001-19528500	chr1:17015501-17016000	chr1:16592501-16593500
chr2:19623001-19623500	chr1:17016501-17017000	chr1:16594001-16595000
chr2:19683501-19684000	chr1:17035001-17035500	chr1:16611501-16612000
chr3:422501-423500	chr1:17077001-17077500	chr1:16613001-16614000
chr3:557501-558000	chr1:17091501-17092000	chr1:16624501-16625000
chr3:810001-810500	chr1:17102001-17102500	chr1:16637001-16637500
chr3:826501-827000	chr1:17110001-17110500	chr1:16641001-16641500
chr3:1057501-1058000	chr1:17136001-17136500	chr1:16645501-16646000
chr3:1166001-1166500	chr1:17139501-17140000	chr1:16689501-16690000
chr3:1170501-1171000	chr1:17141501-17142000	chr1:16706501-16707000
chr3:1283501-1284000	chr1:17143001-17143500	chr1:16710001-16710500
chr3:1370001-1370500	chr1:17145001-17145500	chr1:16711501-16712000
chr3:1571501-1572000	chr1:17151501-17153000	chr1:16712501-16713000
chr3:1602001-1602500	chr1:17178501-17179000	chr1:16722001-16722500
chr3:1951501-1952000	chr1:17193501-17194000	chr1:16723501-16724000
chr3:1963501-1964000	chr1:17201501-17202000	chr1:16737501-16738500
chr3:2138501-2139500	chr1:17239501-17240000	chr1:16773501-16774500
chr3:2362501-2363000	chr1:17254501-17255000	chr1:16778001-16779000
chr3:2628501-2629000	chr1:17267001-17267500	chr1:16790501-16791000
chr3:2773501-2774000	chr1:17268001-17268500	chr1:16792001-16792500
chr3:2849501-2850000	chr1:17282001-17283000	chr1:16793501-16794500
chr3:3080001-3080500	chr1:17289001-17289500	chr1:16803501-16804000
chr3:3205001-3205500	chr1:17295001-17295500	chr1:16806501-16807000
chr3:3423501-3424000	chr1:17300001-17300500	chr1:16807501-16808000
chr3:3664001-3664500	chr1:17314001-17314500	chr1:16810501-16811000
chr3:3874001-3874500	chr1:17324501-17325000	chr1:16815501-16816500
chr3:3965001-3965500	chr1:17332501-17333500	chr1:16820001-16820500
chr3:4216501-4217000	chr1:17335501-17336000	chr1:16824501-16826500
chr3:4468001-4468500	chr1:17341001-17341500	chr1:16841001-16841500
chr3:4497501-4498000	chr1:17342501-17343000	chr1:16842501-16843000
chr3:4551501-4552000	chr1:17369001-17370000	chr1:16844001-16844500
chr3:4727001-4728000	chr1:17376501-17377000	chr1:16857501-16858000
chr3:4728501-4729000	chr1:17381501-17382500	chr1:16858501-16859000
chr3:4752501-4753000	chr1:17384001-17384500	chr1:16860501-16861000
chr3:4796001-4796500	chr1:17405501-17406000	chr1:16870501-16871000
chr3:5137501-5138000	chr1:17441501-17442000	chr1:16889501-16891000
chr3:5328501-5329000	chr1:17448501-17449000	chr1:16902501-16903000
chr3:5379501-5380000	chr1:17449501-17450000	chr1:16903501-16906000
chr3:5590501-5591000	chr1:17466001-17466500	chr1:16923001-16923500
chr3:5622001-5623000	chr1:17490501-17491500	chr1:16930001-16930500
chr3:5623501-5624000	chr1:17502001-17503000	chr1:16938001-16938500
chr3:5629001-5629500	chr1:17515001-17515500	chr1:16939001-16939500
chr3:5744501-5745000	chr1:17525001-17525500	chr1:16962001-16963000
chr3:5835501-5836000	chr1:17551001-17551500	chr1:16966001-16967000
chr3:5866001-5866500	chr1:17552001-17553000	chr1:16967501-16968500
chr3:5929501-5930000	chr1:17563001-17564000	chr1:16975001-16975500
chr3:6344501-6345000	chr1:17605501-17606000	chr1:16987501-16989500
chr3:6486501-6487000	chr1:17611501-17612000	chr1:16997501-16998500
chr3:6729001-6729500	chr1:17632001-17633000	chr1:17004501-17005500
chr3:6940501-6941500	chr1:17639001-17639500	chr1:17006501-17007500
chr3:6991501-6992000	chr1:17655001-17656500	chr1:17008501-17009000
chr3:7279501-7280000	chr1:17665001-17665500	chr1:17035001-17036000
chr3:7318501-7319000	chr1:17666001-17666500	chr1:17064501-17065000
chr3:7634501-7635000	chr1:17674001-17674500	chr1:17077001-17077500
chr3:7659001-7659500	chr1:17685501-17686000	chr1:17091501-17092000
chr3:7765501-7766000	chr1:17689501-17691000	chr1:17102001-17102500
chr3:7766501-7767000	chr1:17709501-17710000	chr1:17108001-17108500
chr3:7772501-7773000	chr1:17710501-17711000	chr1:17136001-17136500
chr3:7806501-7807000	chr1:17713501-17715000	chr1:17139501-17140000
chr3:7845001-7845500	chr1:17727001-17728000	chr1:17141501-17142000
chr3:7851501-7852000	chr1:17766001-17766500	chr1:17143001-17143500
chr3:7860501-7861000	chr1:17820501-17821000	chr1:17145001-17145500
chr3:7922001-7922500	chr1:17831001-17831500	chr1:17151501-17153000
chr3:7937001-7937500	chr1:17840501-17841000	chr1:17178501-17179500
chr3:7995501-7996000	chr1:17874001-17874500	chr1:17193501-17194000
chr3:8138501-8139000	chr1:17900001-17902000	chr1:17201501-17202000
chr3:8185501-8186000	chr1:17937001-17938000	chr1:17241001-17241500
chr3:8189001-8189500	chr1:17979001-17979500	chr1:17254501-17255000
chr3:8209501-8210000	chr1:18007001-18007500	chr1:17267001-17267500
chr3:8497001-8497500	chr1:18010001-18010500	chr1:17268001-17268500
chr3:8547001-8548000	chr1:18013001-18014000	chr1:17282001-17283000
chr3:8574501-8575000	chr1:18017501-18018500	chr1:17289001-17289500
chr3:8596001-8597000	chr1:18019501-18020000	chr1:17295001-17295500
chr3:8644501-8645500	chr1:18047501-18048500	chr1:17300001-17300500
chr3:8684501-8685000	chr1:18055501-18056500	chr1:17314001-17314500
chr3:8690001-8690500	chr1:18088001-18089000	chr1:17324501-17325000
chr3:8752001-8752500	chr1:18095501-18096500	chr1:17332501-17333500
chr3:8873001-8873500	chr1:18111001-18111500	chr1:17335501-17336000
chr3:8875001-8875500	chr1:18126501-18127000	chr1:17341001-17341500
chr3:8883501-8884000	chr1:18136001-18136500	chr1:17342001-17343000
chr3:8976501-8977500	chr1:18163501-18165500	chr1:17369001-17370000
chr3:9186501-9187000	chr1:18214001-18214500	chr1:17376501-17377000
chr3:9256001-9256500	chr1:18270501-18271000	chr1:17381501-17382500
chr3:9257001-9257500	chr1:18297501-18298000	chr1:17384001-17384500
chr3:9300001-9300500	chr1:18300001-18301500	chr1:17398501-17399000
chr3:9361501-9362000	chr1:18302001-18302500	chr1:17404501-17405000
chr3:9381001-9381500	chr1:18320501-18321500	chr1:17405501-17406000
chr3:9384501-9386000	chr1:18342001-18342500	chr1:17441501-17442000
chr3:9471001-9471500	chr1:18380001-18381500	chr1:17448501-17449000
chr3:9540501-9541000	chr1:18386501-18387500	chr1:17449501-17450000
chr3:9558501-9559000	chr1:18415001-18415500	chr1:17466001-17466500
chr3:9664501-9665500	chr1:18437001-18438000	chr1:17490501-17491500
chr3:9699001-9699500	chr1:18449501-18450500	chr1:17502001-17503500
chr3:9713501-9714000	chr1:18456501-18457500	chr1:17515001-17515500
chr3:9736001-9736500	chr1:18493501-18494000	chr1:17525001-17525500
chr3:9739501-9740500	chr1:18548001-18548500	chr1:17551001-17551500
chr3:9769001-9769500	chr1:18551501-18552000	chr1:17552001-17553000
chr3:9808501-9809000	chr1:18553001-18553500	chr1:17563001-17564000
chr3:9890501-9891000	chr1:18599001-18600500	chr1:17574001-17574500
chr3:9977001-9977500	chr1:18606001-18606500	chr1:17605501-17606000
chr3:10049001-10049500	chr1:18627001-18627500	chr1:17632501-17633000
chr3:10066501-10067000	chr1:18632001-18634000	chr1:17639001-17639500
chr3:10075001-10075500	chr1:18643501-18644000	chr1:17655001-17655500
chr3:10082001-10082500	chr1:18745001-18747000	chr1:17660001-17660500
chr3:10140501-10141000	chr1:18766001-18767000	chr1:17665001-17665500
chr3:10146001-10146500	chr1:18768001-18768500	chr1:17666001-17666500
chr3:10177001-10177500	chr1:18790501-18792500	chr1:17667501-17668000
chr3:10190501-10191000	chr1:18804501-18805500	chr1:17674001-17674500
chr3:10202001-10202500	chr1:18849501-18850000	chr1:17685501-17686500
chr3:10294001-10294500	chr1:18859001-18860000	chr1:17689501-17691000
chr3:10314001-10314500	chr1:18887501-18888500	chr1:17709501-17711000
chr3:10417001-10417500	chr1:18894501-18895500	chr1:17713501-17715000
chr3:10440501-10441000	chr1:18905501-18906000	chr1:17727001-17728000
chr3:10457501-10458000	chr1:18931001-18931500	chr1:17759001-17759500
chr3:10461001-10461500	chr1:18962001-18962500	chr1:17766001-17766500
chr3:10476501-10477000	chr1:18971501-18972000	chr1:17820501-17821000
chr3:10509501-10510000	chr1:18980501-18981500	chr1:17831001-17831500
chr3:10514001-10514500	chr1:19027001-19028000	chr1:17838001-17838500
chr3:10517501-10518000	chr1:19054001-19054500	chr1:17840501-17841000
chr3:10575001-10575500	chr1:19055001-19055500	chr1:17874001-17874500
chr3:10593001-10593500	chr1:19056001-19056500	chr1:17900001-17901500
chr3:10599001-10599500	chr1:19062501-19064500	chr1:17937001-17938000
chr3:10666501-10667000	chr1:19085501-19087000	chr1:17961001-17961500
chr3:10681501-10682000	chr1:19145501-19146000	chr1:17979001-17979500
chr3:10718001-10718500	chr1:19146501-19148500	chr1:18010001-18010500
chr3:10753001-10753500	chr1:19172001-19173500	chr1:18013001-18014000
chr3:10758001-10758500	chr1:19180001-19180500	chr1:18017501-18018000
chr3:10781501-10782000	chr1:19226001-19226500	chr1:18019501-18020000
chr3:10791001-10791500	chr1:19236501-19237500	chr1:18021001-18021500
chr3:10908001-10908500	chr1:19249001-19249500	chr1:18033501-18034000
chr3:11023501-11024000	chr1:19303501-19304500	chr1:18047501-18048500
chr3:11099501-11100000	chr1:19327001-19329000	chr1:18055501-18056500
chr3:11133501-11134000	chr1:19336001-19337000	chr1:18088001-18089500
chr3:11141501-11142000	chr1:19352501-19353500	chr1:18095501-18096500
chr3:11162501-11163000	chr1:19354001-19354500	chr1:18111001-18111500
chr3:11176501-11177000	chr1:19368001-19368500	chr1:18126501-18127000
chr3:11296501-11297000	chr1:19374501-19375000	chr1:18130501-18131000
chr3:11452501-11453000	chr1:19380501-19381000	chr1:18136001-18136500
chr3:11751001-11751500	chr1:19388001-19388500	chr1:18163501-18165500
chr3:11798001-11798500	chr1:19389501-19390000	chr1:18214001-18214500
chr3:11853001-11853500	chr1:19393001-19393500	chr1:18270001-18271500
chr3:11972501-11973000	chr1:19403001-19403500	chr1:18297501-18298000
chr3:11980001-11980500	chr1:19404001-19404500	chr1:18300001-18301500
chr3:12558501-12559000	chr1:19426501-19427000	chr1:18302001-18302500
chr3:13480501-13481000	chr1:19428501-19429500	chr1:18320501-18321500
chr3:13520001-13520500	chr1:19430001-19430500	chr1:18325001-18325500
chr3:14318501-14319000	chr1:19465001-19466500	chr1:18342001-18342500
chr3:14320001-14320500	chr1:19476501-19477000	chr1:18380001-18381500
chr3:14810001-14810500	chr1:19498001-19498500	chr1:18386501-18387500
chr3:15078001-15078500	chr1:19577501-19578000	chr1:18415001-18415500
chr3:15188001-15188500	chr1:19593001-19594000	chr1:18437001-18438500
chr3:15643001-15643500	chr1:19666001-19666500	chr1:18449501-18450500
chr3:15650001-15650500	chr1:19693001-19693500	chr1:18457001-18457500
chr3:15653001-15653500	chr1:19704001-19704500	chr1:18493501-18494000
chr3:15666501-15667000	chr1:19717501-19718500	chr1:18548001-18548500
chr3:15779501-15780000	chr1:19728501-19730000	chr1:18549501-18550000
chr3:15814501-15815000	chr1:19736001-19736500	chr1:18551501-18552000
chr3:15818001-15818500	chr1:19741501-19742500	chr1:18553001-18553500
chr3:15868001-15868500	chr1:19744001-19744500	chr1:18599001-18600500
chr3:15938001-15938500	chr1:19749501-19750000	chr1:18606001-18606500
chr3:15967501-15968000	chr1:19763001-19763500	chr1:18627001-18627500
chr3:15989001-15989500	chr1:19768001-19770000	chr1:18632001-18634000
chr3:16039001-16039500	chr1:19780501-19781000	chr1:18745001-18747000
chr3:16071501-16072000	chr1:19808001-19810000	chr1:18766001-18767000
chr3:16100501-16101500	chr1:19909001-19909500	chr1:18768001-18768500
chr3:16114501-16115000	chr1:19941001-19941500	chr1:18769501-18770000
chr3:16158001-16158500	chr1:19943501-19945000	chr1:18790501-18793000
chr3:16182001-16182500	chr1:19993501-19995500	chr1:18804501-18805500
chr3:16193001-16193500	chr1:20024001-20024500	chr1:18849501-18850000
chr3:16204501-16205000	chr1:20032501-20034000	chr1:18859001-18860000
chr3:16222001-16222500	chr1:20118501-20119000	chr1:18887501-18888500
chr3:16259001-16259500	chr1:20128001-20128500	chr1:18894501-18895500
chr3:16269501-16270000	chr1:20131001-20132000	chr1:18905501-18906000
chr3:16293501-16294000	chr1:20154001-20154500	chr1:18931001-18931500
chr3:16333501-16334000	chr1:20166501-20167500	chr1:18971501-18972000
chr3:16341501-16342000	chr1:20172001-20173000	chr1:18980501-18981000
chr3:16353501-16354000	chr1:20194501-20195000	chr1:19027001-19028000
chr3:16405001-16405500	chr1:20205501-20206000	chr1:19054001-19054500
chr3:16416501-16417000	chr1:20206501-20207000	chr1:19055001-19055500
chr3:16419501-16420000	chr1:20208001-20208500	chr1:19056001-19056500
chr3:16538001-16538500	chr1:20312001-20312500	chr1:19062501-19064500
chr3:16562001-16562500	chr1:20320001-20321000	chr1:19085501-19087000
chr3:16584501-16585000	chr1:20362501-20363500	chr1:19145501-19146000
chr3:16700001-16700500	chr1:20412501-20413000	chr1:19147001-19148500
chr3:16732001-16732500	chr1:20433001-20433500	chr1:19172001-19174000
chr3:16755001-16755500	chr1:20489501-20490000	chr1:19180001-19180500
chr3:16787501-16788000	chr1:20499001-20499500	chr1:19198001-19198500
chr3:16798001-16798500	chr1:20509001-20509500	chr1:19226001-19226500
chr3:16881001-16881500	chr1:20513501-20514500	chr1:19236501-19237500
chr3:16947501-16948000	chr1:20520501-20521000	chr1:19248001-19248500
chr3:17048001-17048500	chr1:20525001-20525500	chr1:19249001-19249500
chr3:17087001-17087500	chr1:20559501-20560000	chr1:19268501-19269000
chr3:17098501-17099000	chr1:20622501-20623000	chr1:19303501-19304500
chr3:17147001-17147500	chr1:20624501-20625500	chr1:19327501-19329000
chr3:17150001-17151000	chr1:20683001-20684000	chr1:19336001-19337000
chr3:17177001-17177500	chr1:20685501-20686000	chr1:19352501-19353500
chr3:17202501-17203000	chr1:20686501-20687500	chr1:19354001-19354500
chr3:17203501-17204000	chr1:20697001-20697500	chr1:19368001-19368500
chr3:17276001-17277000	chr1:20699501-20700000	chr1:19374501-19375000
chr3:17299501-17300500	chr1:20703501-20704500	chr1:19380501-19381000
chr3:17363001-17363500	chr1:20734001-20734500	chr1:19388001-19388500
chr3:17402001-17403000	chr1:20815501-20816000	chr1:19389501-19390000
chr3:17408501-17409000	chr1:20820001-20820500	chr1:19393001-19393500
chr3:17417501-17418000	chr1:20823501-20824000	chr1:19403001-19403500
chr3:17418501-17419000	chr1:20824501-20825000	chr1:19404001-19404500
chr3:17531501-17532000	chr1:20826001-20827500	chr1:19424501-19425000
chr3:17546001-17546500	chr1:20914001-20915000	chr1:19426501-19427000
chr3:17623001-17623500	chr1:20972001-20974500	chr1:19428501-19429500
chr3:17658501-17659000	chr1:20979001-20981000	chr1:19430001-19430500
chr3:17730001-17731000	chr1:21021001-21021500	chr1:19465001-19466500
chr3:17928501-17929500	chr1:21034501-21035000	chr1:19476501-19477000
chr3:17986001-17986500	chr1:21038001-21038500	chr1:19577501-19578000
chr3:18019001-18020000	chr1:21042501-21043000	chr1:19593501-19594500
chr3:18062501-18063000	chr1:21054501-21055000	chr1:19666001-19667000
chr3:18069501-18070000	chr1:21105001-21106000	chr1:19693001-19693500
chr3:18171001-18171500	chr1:21107001-21107500	chr1:19704001-19704500
chr3:18180001-18180500	chr1:21125001-21125500	chr1:19718001-19718500
chr3:18243501-18244500	chr1:21128001-21129000	chr1:19728501-19729500
chr3:18308501-18309000	chr1:21172501-21173000	chr1:19735501-19736500
chr3:18458001-18458500	chr1:21180001-21180500	chr1:19741501-19742500
chr3:18585001-18585500	chr1:21210001-21212000	chr1:19744001-19744500
chr3:18629501-18630000	chr1:21228501-21229000	chr1:19749501-19750000
chr3:18634001-18634500	chr1:21260001-21261000	chr1:19763001-19763500
chr3:18652001-18652500	chr1:21335501-21336500	chr1:19768001-19770000
chr3:18758001-18758500	chr1:21341501-21342500	chr1:19780001-19781000
chr3:18860001-18860500	chr1:21374501-21375500	chr1:19808001-19810000
chr3:18873501-18874000	chr1:21388501-21389000	chr1:19909001-19909500
chr3:18885501-18886000	chr1:21390001-21390500	chr1:19944001-19945000
chr3:18928001-18928500	chr1:21391501-21393000	chr1:19993501-19996000
chr3:18976501-18977000	chr1:21399501-21400000	chr1:20024001-20024500
chr3:19133501-19134000	chr1:21401001-21401500	chr1:20032501-20034000
chr3:19134501-19135000	chr1:21428001-21429000	chr1:20106501-20107000
chr3:19178501-19179000	chr1:21439001-21439500	chr1:20118501-20119500
chr3:19428001-19428500	chr1:21448501-21449000	chr1:20128001-20128500
chr3:19429001-19429500	chr1:21470001-21472500	chr1:20131001-20132000
chr3:19520501-19521000	chr1:21507501-21508000	chr1:20154001-20154500
chr3:19529001-19529500	chr1:21509501-21510000	chr1:20166501-20167500
chr3:19536501-19537000	chr1:21514501-21515000	chr1:20172001-20172500
chr3:19622001-19623000	chr1:21525001-21525500	chr1:20175001-20175500
chr3:20024001-20024500	chr1:21529001-21530000	chr1:20194501-20195000
chr3:20090501-20091000	chr1:21602001-21602500	chr1:20205501-20206000
chr3:20144001-20144500	chr1:21609001-21610000	chr1:20206501-20207000
chr3:20189001-20189500	chr1:21615001-21616500	chr1:20208001-20208500
chr3:20233501-20234500	chr1:21628501-21629000	chr1:20226501-20227000
chr3:20349501-20350000	chr1:21637501-21638000	chr1:20312001-20312500
chr3:20483001-20483500	chr1:21640501-21641000	chr1:20320001-20321000
chr3:20685501-20686000	chr1:21681501-21682000	chr1:20362501-20363500
chr3:20726001-20726500	chr1:21683001-21683500	chr1:20403501-20404000
chr3:20764001-20764500	chr1:21739001-21740500	chr1:20412501-20413000
chr3:20770001-20770500	chr1:21741501-21742000	chr1:20433001-20433500
chr3:20787001-20787500	chr1:21744001-21745000	chr1:20437501-20438000
chr3:20788001-20788500	chr1:21758501-21759000	chr1:20489001-20490000
chr3:20875501-20876500	chr1:21772001-21772500	chr1:20499001-20499500
chr3:20991001-20991500	chr1:21784501-21785000	chr1:20509001-20509500
chr3:21277001-21277500	chr1:21790501-21791000	chr1:20513501-20514500
chr3:21413001-21413500	chr1:21802501-21803000	chr1:20520501-20521000
chr3:21547501-21548000	chr1:21815501-21816000	chr1:20525001-20525500
chr3:21601501-21602000	chr1:21821001-21821500	chr1:20559501-20560000
chr3:21654501-21655000	chr1:21823001-21823500	chr1:20569001-20569500
chr3:21694501-21695000	chr1:21838501-21839000	chr1:20622501-20623000
chr3:21981501-21982000	chr1:21858001-21858500	chr1:20624501-20625500
chr3:22002501-22003000	chr1:21872501-21873000	chr1:20683001-20684500
chr3:22058001-22058500	chr1:21873501-21874000	chr1:20685001-20686000
chr3:22059501-22060000	chr1:21881001-21881500	chr1:20686501-20687500
chr3:22064001-22064500	chr1:21918501-21919000	chr1:20697001-20697500
chr3:22215001-22216000	chr1:21991001-21991500	chr1:20699501-20700000
chr3:22370501-22371000	chr1:21992501-21993000	chr1:20703501-20704500
chr3:22372001-22372500	chr1:21995501-21996500	chr1:20734001-20734500
chr3:22585501-22586000	chr1:22025001-22025500	chr1:20815501-20816000
chr3:22695501-22696000	chr1:22043001-22043500	chr1:20820001-20820500
chr3:22700001-22700500	chr1:22060501-22061000	chr1:20823501-20824000
chr3:23085501-23086000	chr1:22067501-22068000	chr1:20824501-20825000
chr3:23115501-23116000	chr1:22085001-22085500	chr1:20826501-20827500
chr4:77001-77500	chr1:22089001-22090000	chr1:20914001-20915000
chr4:79001-79500	chr1:22105001-22106500	chr1:20972001-20974500
chr4:348001-348500	chr1:22112001-22113500	chr1:20979001-20981000
chr4:371501-372000	chr1:22163001-22164000	chr1:21021001-21021500
chr4:379001-379500	chr1:22165001-22168000	chr1:21038001-21038500
chr4:434001-434500	chr1:22183001-22183500	chr1:21042501-21043000
chr4:554001-554500	chr1:22192001-22192500	chr1:21054501-21055000
chr4:572001-572500	chr1:22224501-22225000	chr1:21104001-21104500
chr4:743001-743500	chr1:22261001-22261500	chr1:21105001-21106000
chr4:823501-824000	chr1:22357001-22357500	chr1:21107001-21107500
chr4:929501-930000	chr1:22443501-22444000	chr1:21125001-21125500
chr4:959001-959500	chr1:22447501-22448000	chr1:21128001-21129000
chr4:983001-983500	chr1:22450001-22452000	chr1:21145501-21146000
chr4:1000501-1001500	chr1:22459501-22460000	chr1:21172501-21173000
chr4:1063501-1064000	chr1:22482501-22483000	chr1:21210001-21212000
chr4:1090501-1091000	chr1:22542001-22542500	chr1:21215501-21216000
chr4:1091501-1092000	chr1:22562501-22563000	chr1:21228501-21229000
chr4:1142501-1143000	chr1:22563501-22564000	chr1:21260001-21261000
chr4:1281001-1281500	chr1:22592501-22593000	chr1:21336001-21336500
chr4:1350501-1351500	chr1:22620501-22622000	chr1:21341501-21342500
chr4:1356001-1356500	chr1:22694001-22694500	chr1:21374501-21375000
chr4:1366001-1366500	chr1:22699001-22699500	chr1:21388501-21389000
chr4:1439001-1439500	chr1:22732001-22732500	chr1:21390001-21390500
chr4:1509001-1509500	chr1:22743001-22743500	chr1:21391501-21393000
chr4:1568501-1569000	chr1:22776001-22776500	chr1:21399501-21400000
chr4:1936501-1937000	chr1:22828501-22829500	chr1:21401001-21401500
chr4:1995001-1995500	chr1:22872001-22873500	chr1:21418501-21419000
chr4:1996001-1996500	chr1:22887501-22888500	chr1:21428001-21429000
chr4:2288501-2289000	chr1:22889001-22889500	chr1:21448501-21449000
chr4:2323001-2323500	chr1:22890501-22891000	chr1:21470001-21472500
chr4:2335001-2336000	chr1:22985001-22986000	chr1:21507501-21508000
chr4:2393501-2394000	chr1:22992001-22993500	chr1:21509501-21510000
chr4:2412501-2413000	chr1:23031501-23032000	chr1:21514501-21515000
chr4:2496501-2497000	chr1:23068001-23068500	chr1:21525001-21526000
chr4:2508501-2509000	chr1:23096001-23097500	chr1:21529001-21530000
chr4:2553501-2554000	chr1:23118501-23119000	chr1:21602001-21602500
chr4:2816001-2816500	chr1:23123001-23123500	chr1:21609001-21610000
chr4:2989501-2990000	chr1:23125001-23126000	chr1:21615001-21616500
chr4:3279501-3280000	chr1:23152501-23153500	chr1:21628501-21629000
chr4:3660501-3661000	chr1:23174001-23175500	chr1:21637501-21638000
chr4:4062001-4062500	chr1:23190501-23191000	chr1:21640501-21641000
chr4:4068001-4069000	chr1:23197501-23198000	chr1:21681501-21682000
chr4:4696501-4697000	chr1:23214001-23215500	chr1:21683001-21683500
chr4:5194001-5194500	chr1:23240001-23240500	chr1:21731501-21732500
chr4:5272501-5273000	chr1:23247001-23247500	chr1:21739001-21740000
chr4:5280001-5280500	chr1:23280501-23281000	chr1:21741501-21742000
chr4:5293001-5293500	chr1:23295501-23297500	chr1:21744001-21745000
chr4:5301001-5301500	chr1:23312501-23313000	chr1:21756501-21757000
chr4:5317501-5318000	chr1:23321001-23322000	chr1:21790501-21791000
chr4:5618001-5618500	chr1:23424001-23425000	chr1:21802501-21803000
chr4:5635001-5635500	chr1:23430501-23431500	chr1:21815501-21816000
chr4:5791001-5792000	chr1:23510001-23510500	chr1:21821001-21821500
chr4:5794001-5794500	chr1:23521501-23522000	chr1:21823001-21823500
chr4:5866001-5866500	chr1:23553501-23554500	chr1:21858001-21858500
chr4:5883001-5883500	chr1:23566001-23567000	chr1:21872001-21873000
chr4:5992501-5993000	chr1:23613501-23614500	chr1:21873501-21874000
chr4:6016001-6016500	chr1:23651501-23652000	chr1:21918501-21919000
chr4:6054501-6055000	chr1:23710001-23711500	chr1:21991001-21991500
chr4:6067001-6067500	chr1:23723501-23724000	chr1:21992501-21993000
chr4:6140501-6141000	chr1:23735001-23735500	chr1:21995501-21996500
chr4:6166001-6166500	chr1:23755001-23755500	chr1:22025001-22025500
chr4:6168501-6169000	chr1:23875001-23875500	chr1:22060501-22061000
chr4:6173001-6173500	chr1:23876501-23877500	chr1:22067501-22068000
chr4:6179001-6179500	chr1:23925001-23926000	chr1:22085001-22085500
chr4:6274001-6274500	chr1:23940501-23941000	chr1:22089001-22090000
chr4:6340001-6340500	chr1:24027001-24028000	chr1:22105001-22106500
chr4:6427001-6427500	chr1:24082001-24083000	chr1:22107001-22107500
chr4:6479501-6480000	chr1:24093001-24093500	chr1:22112001-22113500
chr4:6647001-6647500	chr1:24126001-24126500	chr1:22163001-22164500
chr4:6655001-6655500	chr1:24241001-24242000	chr1:22165001-22168000
chr4:6699001-6699500	chr1:24350501-24353000	chr1:22183001-22183500
chr4:6752001-6752500	chr1:24385001-24385500	chr1:22192001-22192500
chr4:6757501-6758000	chr1:24429001-24429500	chr1:22206501-22207000
chr4:6846001-6846500	chr1:24447001-24447500	chr1:22224501-22225000
chr4:6874501-6875000	chr1:24508001-24508500	chr1:22261001-22261500
chr4:6895001-6895500	chr1:24532001-24532500	chr1:22357001-22357500
chr4:6899501-6900000	chr1:24534001-24534500	chr1:22443501-22444000
chr4:6908501-6909000	chr1:24553501-24554000	chr1:22447501-22448000
chr4:6944001-6944500	chr1:24572001-24573000	chr1:22450001-22452000
chr4:6953501-6954500	chr1:24577001-24577500	chr1:22459501-22460000
chr4:7034501-7035000	chr1:24587001-24587500	chr1:22482501-22483000
chr4:7041001-7042000	chr1:24605001-24605500	chr1:22542001-22542500
chr4:7139501-7140000	chr1:24645501-24646000	chr1:22562501-22563000
chr4:7330501-7331000	chr1:24705001-24706000	chr1:22563501-22564000
chr4:7390501-7391000	chr1:24718501-24719000	chr1:22592501-22593000
chr4:7520001-7521000	chr1:24741001-24741500	chr1:22620501-22622000
chr4:7564001-7564500	chr1:24742001-24742500	chr1:22626001-22626500
chr4:7565001-7565500	chr1:24745001-24745500	chr1:22694001-22694500
chr4:7652501-7653000	chr1:24772001-24773000	chr1:22699001-22699500
chr4:7817001-7817500	chr1:24776501-24777000	chr1:22732001-22732500
chr4:7830001-7830500	chr1:24822501-24823000	chr1:22743001-22743500
chr4:7863501-7864000	chr1:24831501-24832000	chr1:22751501-22752000
chr4:7896501-7897000	chr1:24832501-24833000	chr1:22776001-22776500
chr4:7906001-7906500	chr1:24835001-24836000	chr1:22778501-22779000
chr4:7969501-7970000	chr1:24838501-24839000	chr1:22828501-22829500
chr4:8064001-8064500	chr1:24844501-24845000	chr1:22844501-22845500
chr4:8065501-8066000	chr1:24871501-24872000	chr1:22855501-22856000
chr4:8088001-8088500	chr1:24897501-24898000	chr1:22872001-22874000
chr4:8130501-8131000	chr1:24907501-24909000	chr1:22887501-22888500
chr4:8141501-8142000	chr1:24917501-24918500	chr1:22889001-22889500
chr4:8166501-8167000	chr1:24948001-24948500	chr1:22890501-22891000
chr4:8208001-8208500	chr1:25033501-25034000	chr1:22985001-22986000
chr4:8326501-8327000	chr1:25057001-25057500	chr1:22992001-22994000
chr4:8421001-8422000	chr1:25097501-25099000	chr1:23021001-23021500
chr4:8443001-8443500	chr1:25159001-25159500	chr1:23031501-23032000
chr4:8465501-8466000	chr1:25163001-25163500	chr1:23068001-23068500
chr4:8769001-8769500	chr1:25180001-25180500	chr1:23094501-23095000
chr4:8802501-8803000	chr1:25247501-25248000	chr1:23096001-23097500
chr4:8836501-8837500	chr1:25266001-25266500	chr1:23118501-23119000
chr4:8899501-8900000	chr1:25332001-25332500	chr1:23125001-23126000
chr4:8958001-8958500	chr1:25357501-25358500	chr1:23140501-23141000
chr4:8959501-8960000	chr1:25400501-25401500	chr1:23152501-23153500
chr4:9146501-9147000	chr1:25496001-25496500	chr1:23174001-23175500
chr4:9266001-9266500	chr1:25594501-25595000	chr1:23190501-23191500
chr4:9284501-9285000	chr1:25609501-25610500	chr1:23197501-23198000
chr4:9317501-9318000	chr1:25639501-25642000	chr1:23214001-23215500
chr4:9357001-9357500	chr1:25696501-25697000	chr1:23220001-23220500
chr4:9368501-9369000	chr1:25722501-25723500	chr1:23240001-23240500
chr4:9440001-9440500	chr1:25728501-25729000	chr1:23247001-23247500
chr4:9911001-9911500	chr1:25730001-25730500	chr1:23280501-23281000
chr4:9913001-9914000	chr1:25779501-25780500	chr1:23295501-23297500
chr4:9981001-9981500	chr1:25962501-25963000	chr1:23312501-23313000
chr4:10171501-10172000	chr1:25973501-25974000	chr1:23321001-23322000
chr4:10178501-10179000	chr1:25976501-25977000	chr1:23424001-23425000
chr4:10270501-10271500	chr1:26084001-26084500	chr1:23430501-23431500
chr4:10539001-10539500	chr1:26140001-26140500	chr1:23510001-23510500
chr4:10632501-10633000	chr1:26169501-26171500	chr1:23521501-23522000
chr4:10716501-10717000	chr1:26196001-26197000	chr1:23553501-23554500
chr4:10792501-10793000	chr1:26307001-26307500	chr1:23566001-23567000
chr4:10793501-10794000	chr1:26336001-26336500	chr1:23613501-23614500
chr4:10870501-10871000	chr1:26366501-26367000	chr1:23651501-23652000
chr4:10899501-10900000	chr1:26374501-26376000	chr1:23710001-23711500
chr4:11000501-11001000	chr1:26510501-26511500	chr1:23723501-23724000
chr4:11235501-11236000	chr1:26551501-26552500	chr1:23755001-23755500
chr4:11255501-11256000	chr1:26583001-26583500	chr1:23875001-23875500
chr4:11361501-11363000	chr1:26604001-26604500	chr1:23876501-23877500
chr4:11380001-11380500	chr1:26650501-26651000	chr1:23907001-23907500
chr4:11932001-11932500	chr1:26779001-26781500	chr1:23925001-23926000
chr4:11963501-11964000	chr1:26880001-26881500	chr1:23932001-23932500
chr4:12052001-12052500	chr1:27035501-27036000	chr1:23940501-23941000
chr4:12365001-12365500	chr1:27117501-27118000	chr1:24027001-24028000
chr4:12570001-12570500	chr1:27186501-27187000	chr1:24082001-24083000
chr4:12606501-12607000	chr1:27240501-27241500	chr1:24093001-24093500
chr4:12699001-12699500	chr1:27428501-27429000	chr1:24101001-24101500
chr4:12740001-12740500	chr1:27597001-27598000	chr1:24126001-24126500
chr4:12769001-12769500	chr1:27710501-27711000	chr1:24223001-24223500
chr4:12968001-12968500	chr1:27859501-27861000	chr1:24241001-24242000
chr4:13124001-13124500	chr1:27932501-27933000	chr1:24250501-24251000
chr4:13419001-13419500	chr1:27972001-27973000	chr1:24350501-24353000
chr4:14031501-14032000	chr1:28051501-28052000	chr1:24385001-24385500
chr4:14122001-14122500	chr1:28105501-28106000	chr1:24429001-24429500
chr4:14250501-14251000	chr1:28161001-28162500	chr1:24447001-24447500
chr4:14390001-14390500	chr1:28188501-28189000	chr1:24484001-24485000
chr4:14399001-14399500	chr1:28259001-28259500	chr1:24508001-24508500
chr4:15066001-15067000	chr1:28293001-28293500	chr1:24532001-24532500
chr4:15441501-15442000	chr1:28312001-28313000	chr1:24534001-24534500
chr4:15816001-15816500	chr1:28332001-28333000	chr1:24553501-24554000
chr4:16054501-16055500	chr1:28397501-28399000	chr1:24572001-24573000
chr4:16705501-16706000	chr1:28421001-28421500	chr1:24577001-24577500
chr4:16729501-16730000	chr1:28471001-28471500	chr1:24587001-24587500
chr4:16783001-16783500	chr1:28515001-28516500	chr1:24605001-24606000
chr4:16951501-16952000	chr1:28520501-28521000	chr1:24645501-24646000
chr4:17081001-17081500	chr1:28522001-28522500	chr1:24705001-24706000
chr4:17624501-17625000	chr1:28527001-28528000	chr1:24718501-24719000
chr4:17655001-17656000	chr1:28592501-28593000	chr1:24721001-24721500
chr4:18201501-18202000	chr1:28703001-28704000	chr1:24741001-24741500
chr4:18232501-18233000	chr1:28731501-28732000	chr1:24742001-24742500
chr4:18377501-18378000	chr1:28750001-28750500	chr1:24745001-24745500
chr5:56501-57000	chr1:28785501-28786000	chr1:24772001-24773000
chr5:91001-91500	chr1:28788501-28789500	chr1:24776501-24777000
chr5:113001-113500	chr1:28815501-28816000	chr1:24822501-24823000
chr5:349501-350000	chr1:28827001-28828500	chr1:24831501-24833000
chr5:354501-355000	chr1:28891501-28892000	chr1:24835001-24836000
chr5:356001-357000	chr1:28912501-28913500	chr1:24838501-24839000
chr5:393501-395000	chr1:28936001-28936500	chr1:24871501-24872000
chr5:490001-491000	chr1:28994001-28995000	chr1:24894001-24894500
chr5:491501-492000	chr1:29078001-29079000	chr1:24897501-24898000
chr5:706501-707000	chr1:29125501-29126000	chr1:24907501-24909000
chr5:744001-744500	chr1:29244001-29244500	chr1:24917501-24918500
chr5:745001-745500	chr1:29250001-29250500	chr1:24948001-24948500
chr5:1026501-1027000	chr1:29263001-29263500	chr1:25033501-25034000
chr5:1108501-1109000	chr1:29305501-29306000	chr1:25096001-25097000
chr5:1180501-1181000	chr1:29319001-29320500	chr1:25097501-25099000
chr5:1518501-1519000	chr1:29337001-29337500	chr1:25159001-25159500
chr5:1819501-1820000	chr1:29377001-29377500	chr1:25163001-25163500
chr5:1897001-1898500	chr1:29380501-29381000	chr1:25180001-25180500
chr5:2071501-2072500	chr1:29481001-29481500	chr1:25181001-25181500
chr5:2187001-2187500	chr1:29496501-29497000	chr1:25247501-25248000
chr5:2276001-2276500	chr1:29578001-29578500	chr1:25266001-25266500
chr5:2348001-2348500	chr1:29590001-29590500	chr1:25332001-25332500
chr5:2603001-2604000	chr1:29611501-29612500	chr1:25357501-25358500
chr5:3115501-3116000	chr1:29774001-29775000	chr1:25400501-25401500
chr5:3566501-3567000	chr1:29840501-29841500	chr1:25496001-25496500
chr5:3815001-3815500	chr1:29983001-29984500	chr1:25594501-25595000
chr5:3903501-3904000	chr1:30200001-30200500	chr1:25609501-25610500
chr5:4208001-4208500	chr1:30251001-30255500	chr1:25613501-25614000
chr5:4212501-4213000	chr1:30427501-30428000	chr1:25639501-25642000
chr5:4313001-4313500	chr2:70501-71000	chr1:25660001-25660500
chr5:4508001-4508500	chr2:72501-73000	chr1:25696501-25697500
chr5:4561001-4561500	chr2:122001-122500	chr1:25722501-25723500
chr5:4776001-4776500	chr2:127501-128000	chr1:25728501-25729000
chr5:4781501-4782000	chr2:145501-146500	chr1:25730001-25730500
chr5:4937001-4937500	chr2:152001-152500	chr1:25751501-25752000
chr5:5128501-5129500	chr2:153001-153500	chr1:25779501-25780500
chr5:5625001-5625500	chr2:179501-180000	chr1:25962501-25963000
chr5:5648001-5648500	chr2:184001-184500	chr1:25973501-25974000
chr5:5701501-5702000	chr2:205001-205500	chr1:25976501-25977000
chr5:5702501-5703000	chr2:241001-242000	chr1:26084001-26084500
chr5:5749001-5749500	chr2:254001-254500	chr1:26140001-26140500
chr5:5785001-5785500	chr2:268501-269000	chr1:26169501-26171500
chr5:5801501-5802000	chr2:292501-293500	chr1:26196001-26197000
chr5:5969501-5970000	chr2:305501-306000	chr1:26307001-26307500
chr5:6384001-6384500	chr2:314501-315000	chr1:26335501-26336500
chr5:6398001-6398500	chr2:324001-324500	chr1:26366501-26367000
chr5:6420001-6420500	chr2:368001-368500	chr1:26374501-26376000
chr5:6447501-6448000	chr2:394501-396500	chr1:26510501-26511500
chr5:6702001-6702500	chr2:400001-400500	chr1:26551501-26552500
chr5:6869001-6869500	chr2:407001-408000	chr1:26583001-26583500
chr5:6926001-6926500	chr2:416001-416500	chr1:26604001-26604500
chr5:7027501-7028000	chr2:423001-423500	chr1:26650501-26651000
chr5:7057001-7057500	chr2:424501-425000	chr1:26722001-26722500
chr5:7070001-7070500	chr2:438501-439000	chr1:26779001-26781500
chr5:7190001-7190500	chr2:439501-440000	chr1:26880001-26881500
chr5:7261001-7261500	chr2:455501-456000	chr1:26926001-26926500
chr5:7417501-7418000	chr2:500001-502000	chr1:27035501-27036000
chr5:7467501-7468000	chr2:511001-511500	chr1:27117501-27118000
chr5:7478501-7479000	chr2:530001-530500	chr1:27186501-27187000
chr5:7753001-7753500	chr2:543001-544000	chr1:27240501-27241500
chr5:7777001-7778000	chr2:560001-560500	chr1:27428501-27429500
chr5:7818001-7819000	chr2:582001-583000	chr1:27597001-27598000
chr5:7893001-7893500	chr2:594001-594500	chr1:27710501-27711000
chr5:8123001-8123500	chr2:626001-626500	chr1:27859501-27861000
chr5:8177501-8178000	chr2:631001-631500	chr1:27932501-27933000
chr5:8178501-8179500	chr2:637001-637500	chr1:27972001-27973000
chr5:8215501-8216000	chr2:686501-687000	chr1:28051501-28052000
chr5:8272501-8273000	chr2:704001-704500	chr1:28105501-28106000
chr5:8313001-8313500	chr2:707501-709000	chr1:28161001-28162500
chr5:8322501-8323000	chr2:709501-710000	chr1:28188501-28189000
chr5:8398001-8398500	chr2:713501-714000	chr1:28259001-28259500
chr5:8404501-8405000	chr2:715001-715500	chr1:28293001-28293500
chr5:8447001-8447500	chr2:716001-717000	chr1:28312001-28313000
chr5:8538501-8539000	chr2:721501-722500	chr1:28332501-28333000
chr5:8611501-8612000	chr2:755001-755500	chr1:28397501-28399000
chr5:8683501-8684000	chr2:768001-769000	chr1:28421001-28421500
chr5:8684501-8685000	chr2:780001-780500	chr1:28471001-28471500
chr5:8701501-8702000	chr2:794001-795500	chr1:28515001-28516500
chr5:8715501-8716000	chr2:826001-826500	chr1:28520501-28521000
chr5:8745501-8746500	chr2:856501-857000	chr1:28522001-28522500
chr5:8749001-8749500	chr2:871001-872500	chr1:28526501-28527000
chr5:8766501-8767000	chr2:891001-891500	chr1:28527501-28528000
chr5:8769501-8770000	chr2:904001-905500	chr1:28592501-28593000
chr5:8770501-8771000	chr2:909501-910500	chr1:28703001-28704000
chr5:8919001-8919500	chr2:911501-913500	chr1:28731501-28732000
chr5:8934001-8934500	chr2:914001-914500	chr1:28750001-28750500
chr5:8994001-8994500	chr2:919501-920000	chr1:28785501-28786000
chr5:9042001-9042500	chr2:921001-921500	chr1:28788501-28789500
chr5:9049501-9050000	chr2:932501-934000	chr1:28815501-28816000
chr5:9188501-9189000	chr2:980001-980500	chr1:28827001-28828500
chr5:9357501-9358000	chr2:984001-984500	chr1:28891501-28892000
chr5:9558001-9558500	chr2:1010501-1013000	chr1:28912501-28913000
chr5:9567501-9568000	chr2:1017501-1018000	chr1:28913501-28914000
chr5:9616001-9617000	chr2:1027501-1028000	chr1:28936001-28936500
chr5:9632501-9633000	chr2:1037501-1039000	chr1:28994001-28995000
chr5:9802501-9803000	chr2:1048501-1049500	chr1:29078001-29079000
chr5:9818501-9819000	chr2:1050001-1050500	chr1:29125501-29126000
chr5:9827501-9828000	chr2:1065501-1066000	chr1:29244001-29244500
chr5:9851001-9851500	chr2:1076001-1076500	chr1:29250001-29250500
chr5:9876501-9877000	chr2:1078501-1079000	chr1:29263001-29263500
chr5:9902001-9902500	chr2:1085001-1087000	chr1:29305501-29306000
chr5:9964001-9964500	chr2:1089001-1089500	chr1:29319001-29320500
chr5:10240501-10241000	chr2:1111501-1112000	chr1:29337001-29337500
chr5:10265501-10266000	chr2:1123501-1124000	chr1:29377001-29377500
chr5:10283001-10283500	chr2:1126501-1127500	chr1:29380501-29381000
chr5:10290501-10291000	chr2:1134001-1134500	chr1:29469501-29470000
chr5:10480001-10480500	chr2:1170001-1170500	chr1:29481001-29481500
chr5:10613001-10613500	chr2:1194001-1194500	chr1:29496501-29497000
chr5:10644501-10645000	chr2:1205501-1206000	chr1:29578001-29578500
chr5:10646501-10647000	chr2:1208501-1209000	chr1:29590001-29590500
chr5:10772001-10772500	chr2:1212001-1212500	chr1:29611501-29612500
chr5:10798501-10799000	chr2:1241001-1241500	chr1:29774501-29775500
chr5:10801001-10801500	chr2:1246501-1247000	chr1:29983001-29984500
chr5:10807501-10808000	chr2:1260001-1260500	chr1:30200001-30200500
chr5:13231501-13232000	chr2:1263001-1264000	chr1:30251001-30255500
chr5:13362001-13362500	chr2:1265001-1265500	chr1:30427501-30428000
chr5:13418001-13418500	chr2:1268501-1269000	chr2:70501-71500
chr5:13472501-13473000	chr2:1271501-1272500	chr2:72501-73000
chr5:13723001-13723500	chr2:1281001-1281500	chr2:122001-122500
chr5:13759501-13760000	chr2:1301501-1302000	chr2:145501-146000
chr5:13828501-13829000	chr2:1314001-1314500	chr2:152001-153500
chr5:13855001-13855500	chr2:1322001-1322500	chr2:171501-172000
chr5:13859001-13859500	chr2:1333001-1333500	chr2:179501-180000
chr5:13890501-13891000	chr2:1369501-1370000	chr2:184001-184500
chr5:13905501-13906000	chr2:1380501-1381500	chr2:205001-205500
chr5:14089001-14090000	chr2:1383501-1384500	chr2:216501-217000
chr5:14153501-14154000	chr2:1393501-1394000	chr2:240501-242000
chr5:14265501-14266000	chr2:1395001-1397000	chr2:254001-254500
chr5:14288501-14289000	chr2:1399001-1399500	chr2:266001-266500
chr5:14298501-14299000	chr2:1409501-1410000	chr2:268501-269000
chr5:14301001-14301500	chr2:1412501-1413500	chr2:275001-275500
chr5:14409501-14410000	chr2:1414001-1414500	chr2:292501-293500
chr5:14414001-14414500	chr2:1426001-1426500	chr2:303001-303500
chr5:14433001-14433500	chr2:1441501-1442500	chr2:305501-306000
chr5:14440001-14440500	chr2:1457001-1457500	chr2:314501-315000
chr5:14493501-14494000	chr2:1459501-1460500	chr2:324001-324500
chr5:14574001-14574500	chr2:1461001-1461500	chr2:368001-368500
chr5:14584001-14584500	chr2:1465501-1467000	chr2:379001-379500
chr5:14589501-14590000	chr2:1468501-1469000	chr2:390501-391000
chr5:14603001-14603500	chr2:1482501-1483000	chr2:394501-396500
chr5:14760001-14760500	chr2:1504001-1504500	chr2:400001-400500
chr5:14776501-14777000	chr2:1509001-1509500	chr2:402501-403500
chr5:14808501-14809000	chr2:1513001-1513500	chr2:407001-408000
chr5:14880001-14880500	chr2:1521001-1521500	chr2:416001-416500
chr5:14967501-14968000	chr2:1552501-1553000	chr2:423001-423500
chr5:14994501-14995000	chr2:1562501-1563000	chr2:424501-425000
chr5:15031501-15032000	chr2:1567501-1568000	chr2:438501-439000
chr5:15101501-15102000	chr2:1572501-1573000	chr2:439501-440000
chr5:15183001-15183500	chr2:1585001-1585500	chr2:472001-472500
chr5:15203501-15204000	chr2:1593001-1593500	chr2:500001-502000
chr5:15207001-15207500	chr2:1597001-1597500	chr2:511001-511500
chr5:15213001-15213500	chr2:1617001-1618500	chr2:530001-530500
chr5:15302001-15302500	chr2:1620501-1621000	chr2:543001-544500
chr5:15334001-15334500	chr2:1629501-1631000	chr2:560001-560500
chr5:15341501-15342000	chr2:1636501-1637500	chr2:575001-575500
chr5:15429501-15430000	chr2:1642001-1642500	chr2:582001-583000
chr5:15498501-15499000	chr2:1670001-1670500	chr2:594001-594500
chr5:15561501-15562000	chr2:1678501-1679000	chr2:626001-626500
chr5:15576501-15577000	chr2:1681001-1682000	chr2:631001-631500
chr5:15636001-15636500	chr2:1685001-1685500	chr2:637001-637500
chr5:15640501-15641000	chr2:1691001-1692000	chr2:659501-660000
chr5:15710001-15710500	chr2:1709501-1710000	chr2:686501-687000
chr5:15718001-15718500	chr2:1716501-1717500	chr2:704001-704500
chr5:15742001-15742500	chr2:1731501-1732000	chr2:707501-710000
chr5:15779001-15779500	chr2:1734501-1735500	chr2:713501-714000
chr5:15791001-15791500	chr2:1740501-1742000	chr2:715001-715500
chr5:15841001-15841500	chr2:1751001-1751500	chr2:716001-717000
chr5:15855501-15856000	chr2:1756501-1757000	chr2:721501-722500
chr5:15913001-15913500	chr2:1779001-1780000	chr2:723001-723500
chr5:15918001-15918500	chr2:1793501-1794000	chr2:726001-726500
chr5:16033501-16034000	chr2:1821501-1822000	chr2:736501-737000
chr5:16051001-16051500	chr2:1822501-1823000	chr2:755001-755500
chr5:16120001-16120500	chr2:1850501-1851500	chr2:762501-763000
chr5:16121001-16121500	chr2:1857001-1857500	chr2:768001-769000
chr5:16160501-16161000	chr2:1869001-1869500	chr2:780001-780500
chr5:16211001-16212000	chr2:1881501-1883000	chr2:794001-795500
chr5:16276001-16276500	chr2:1887001-1887500	chr2:826001-826500
chr5:16357001-16358000	chr2:1889501-1890500	chr2:856501-857000
chr5:16588001-16588500	chr2:1902501-1903500	chr2:871001-872500
chr5:16642001-16642500	chr2:1912501-1913000	chr2:891001-891500
chr5:16682001-16682500	chr2:1927001-1927500	chr2:892001-892500
chr5:16747501-16748000	chr2:1963001-1964000	chr2:904001-904500
chr5:16908001-16908500	chr2:1982501-1983000	chr2:905001-905500
chr5:16970501-16971000	chr2:1988001-1989000	chr2:909501-910500
chr5:17029001-17029500	chr2:2018001-2018500	chr2:911501-913500
chr5:17086001-17086500	chr2:2031501-2032000	chr2:914001-914500
chr5:17327001-17327500	chr2:2034001-2034500	chr2:915001-915500
chr5:17347001-17347500	chr2:2053501-2054500	chr2:919501-920000
chr5:17359501-17360000	chr2:2058501-2060000	chr2:921001-921500
chr5:17365501-17366500	chr2:2060501-2061000	chr2:932001-934000
chr5:17478001-17478500	chr2:2065001-2065500	chr2:980001-980500
chr5:17578501-17579000	chr2:2066501-2067000	chr2:984001-984500
chr5:17605501-17606000	chr2:2082001-2082500	chr2:998501-999000
chr5:17617001-17617500	chr2:2085001-2086500	chr2:1010501-1011500
chr5:17710501-17711000	chr2:2089001-2089500	chr2:1012001-1013000
chr5:17726501-17727000	chr2:2130001-2130500	chr2:1017501-1018000
chr5:17742001-17742500	chr2:2131001-2131500	chr2:1027501-1028000
chr5:17776001-17777500	chr2:2138501-2141500	chr2:1037501-1039000
chr5:17885501-17886000	chr2:2148501-2149000	chr2:1048001-1049500
chr5:17956501-17957000	chr2:2150001-2151000	chr2:1050001-1050500
chr5:17976501-17977000	chr2:2156001-2156500	chr2:1065501-1066000
chr5:18172001-18172500	chr2:2174001-2175000	chr2:1076001-1076500
chr5:18239001-18239500	chr2:2178001-2178500	chr2:1078501-1079000
chr5:18480001-18480500	chr2:2197001-2198000	chr2:1085001-1086500
chr5:18520001-18520500	chr2:2217001-2219500	chr2:1088501-1089500
chr5:18550501-18551000	chr2:2223501-2224000	chr2:1092001-1092500
chr5:18556001-18556500	chr2:2227001-2227500	chr2:1111501-1112000
chr5:18633501-18634000	chr2:2232001-2232500	chr2:1123501-1124000
chr5:18642001-18642500	chr2:2240501-2241000	chr2:1126501-1127500
chr5:18737501-18738000	chr2:2246001-2246500	chr2:1134001-1134500
chr5:18854501-18855000	chr2:2260501-2261000	chr2:1170001-1170500
chr5:18919501-18920000	chr2:2262001-2262500	chr2:1178501-1179000
chr5:18981001-18981500	chr2:2264001-2264500	chr2:1194001-1194500
chr5:19002001-19002500	chr2:2284001-2284500	chr2:1196001-1196500
chr5:19014501-19015000	chr2:2299001-2299500	chr2:1206501-1207000
chr5:19018501-19019500	chr2:2311501-2312500	chr2:1207501-1208000
chr5:19026501-19027000	chr2:2319501-2322000	chr2:1208501-1209000
chr5:19081001-19081500	chr2:2325501-2326000	chr2:1241001-1241500
chr5:19101501-19102000	chr2:2332001-2332500	chr2:1242501-1243000
chr5:19114501-19115000	chr2:2357501-2358000	chr2:1246501-1247000
chr5:19189001-19189500	chr2:2362501-2363000	chr2:1260001-1260500
chr5:19198001-19199500	chr2:2428501-2429000	chr2:1263001-1264500
chr5:19364501-19365000	chr2:2443501-2444000	chr2:1265001-1265500
chr5:19391001-19391500	chr2:2456001-2456500	chr2:1268501-1269000
chr5:19439501-19440000	chr2:2473001-2473500	chr2:1271501-1272000
chr5:19479501-19480000	chr2:2518501-2519000	chr2:1281001-1281500
chr5:19671001-19671500	chr2:2520501-2521000	chr2:1314001-1314500
chr5:19687501-19688000	chr2:2521501-2522000	chr2:1333001-1333500
chr5:19821001-19821500	chr2:2537501-2538000	chr2:1347501-1348000
chr5:19823001-19823500	chr2:2591501-2592000	chr2:1368001-1369000
chr5:19870501-19871000	chr2:2600501-2601500	chr2:1369501-1370000
chr5:19967501-19968000	chr2:2603501-2606000	chr2:1370501-1371000
chr5:19998001-19998500	chr2:2606501-2607000	chr2:1371501-1372000
chr5:20062001-20062500	chr2:2610501-2611000	chr2:1380501-1381500
chr5:20209001-20209500	chr2:2653501-2654000	chr2:1383501-1384500
chr5:20277001-20278000	chr2:2655501-2656000	chr2:1393501-1394500
chr5:20278501-20279000	chr2:2731001-2731500	chr2:1395001-1397000
chr5:20280001-20281500	chr2:2738001-2738500	chr2:1399001-1399500
chr5:20295001-20295500	chr2:2762501-2763000	chr2:1409501-1410000
chr5:20398501-20399000	chr2:2843501-2844500	chr2:1412501-1413500
chr5:20576001-20576500	chr2:2853501-2854500	chr2:1414001-1414500
chr5:20594501-20595000	chr2:2887501-2888000	chr2:1426001-1426500
chr5:20609001-20609500	chr2:2923501-2924000	chr2:1441501-1442500
chr5:20674501-20675000	chr2:2966001-2966500	chr2:1444001-1444500
chr5:20680501-20681000	chr2:2980001-2980500	chr2:1457001-1457500
chr5:20681501-20682000	chr2:2985001-2986000	chr2:1459001-1460500
chr5:20743001-20743500	chr2:3014001-3014500	chr2:1461001-1461500
chr5:20788001-20788500	chr2:3062501-3063000	chr2:1465501-1467000
chr5:20856001-20856500	chr2:3111001-3111500	chr2:1468501-1469000
chr5:21028001-21028500	chr2:3513001-3513500	chr2:1482501-1483000
chr5:21155501-21156000	chr2:3516501-3517000	chr2:1504001-1504500
chr5:21169501-21170000	chr2:3528001-3528500	chr2:1513001-1513500
chr5:21174501-21175000	chr2:3530001-3531500	chr2:1546501-1547000
chr5:21456001-21456500	chr2:3534001-3534500	chr2:1552501-1553000
chr5:21530501-21532000	chr2:3584001-3584500	chr2:1562501-1563000
chr5:21547001-21547500	chr2:3585501-3587000	chr2:1567501-1568000
chr5:21584001-21584500	chr2:3642001-3642500	chr2:1572501-1573000
chr5:21670001-21670500	chr2:3749501-3750000	chr2:1585001-1585500
chr5:21696501-21697500	chr2:3815501-3816000	chr2:1587501-1588000
chr5:21776001-21777000	chr2:3985501-3986500	chr2:1593001-1593500
chr5:21969001-21969500	chr2:4005501-4006000	chr2:1597001-1597500
chr5:22021501-22022000	chr2:4007001-4007500	chr2:1617001-1618500
chr5:22137001-22137500	chr2:4024001-4025500	chr2:1620501-1621000
chr5:22231501-22232000	chr2:4078001-4078500	chr2:1629501-1631000
chr5:22335001-22335500	chr2:4079501-4080000	chr2:1636501-1637500
chr5:22512501-22513000	chr2:4097501-4098000	chr2:1642001-1642500
chr5:22618001-22618500	chr2:4104001-4104500	chr2:1664001-1664500
chr5:22621501-22622000	chr2:4121001-4121500	chr2:1670001-1670500
chr5:22675001-22675500	chr2:4140501-4141000	chr2:1678501-1679000
chr5:22801501-22802000	chr2:4262501-4263000	chr2:1681001-1681500
chr5:22911001-22911500	chr2:4301501-4302000	chr2:1684501-1685500
chr5:23024501-23025000	chr2:4302501-4303500	chr2:1691001-1692500
chr5:23026501-23027500	chr2:4306001-4306500	chr2:1701501-1702000
chr5:23046501-23047000	chr2:4331501-4332000	chr2:1709501-1710000
chr5:23323001-23323500	chr2:4334501-4335000	chr2:1716501-1717500
chr5:23432501-23433000	chr2:4338001-4338500	chr2:1731501-1732000
chr5:23654501-23655000	chr2:4340501-4341000	chr2:1740501-1742000
chr5:23662001-23662500	chr2:4348001-4348500	chr2:1751001-1751500
chr5:23774501-23775000	chr2:4350001-4350500	chr2:1756501-1757000
chr5:23788001-23788500	chr2:4353501-4354000	chr2:1779001-1780000
chr5:23825001-23825500	chr2:4357001-4357500	chr2:1793501-1794000
chr5:24002001-24002500	chr2:4415501-4416000	chr2:1821501-1822000
chr5:24110501-24111000	chr2:4450501-4451000	chr2:1822501-1823000
chr5:24118001-24118500	chr2:4459001-4459500	chr2:1824501-1825000
chr5:24186001-24186500	chr2:4472001-4472500	chr2:1851001-1851500
chr5:24314001-24314500	chr2:4473501-4474500	chr2:1857001-1857500
chr5:24370501-24371000	chr2:4476001-4476500	chr2:1869001-1869500
chr5:24449001-24449500	chr2:4558501-4559000	chr2:1879501-1880000
chr5:24476001-24476500	chr2:4564001-4564500	chr2:1882001-1883000
chr5:24586501-24587000	chr2:4618001-4618500	chr2:1887001-1887500
chr5:24703501-24704000	chr2:4799001-4799500	chr2:1889501-1890500
chr5:24820001-24820500	chr2:4893501-4894500	chr2:1899001-1899500
chr5:24966501-24967000	chr2:4944001-4945500	chr2:1902501-1903500
chr5:25178501-25179500	chr2:4965501-4966000	chr2:1912501-1913000
chr5:25844501-25845000	chr2:5010001-5010500	chr2:1927001-1927500
chr5:25905001-25905500	chr2:5021501-5022000	chr2:1947501-1948000
chr5:25936001-25936500	chr2:5037501-5038000	chr2:1963001-1964000
chr5:26015001-26015500	chr2:5048001-5049000	chr2:1982501-1983000
chr5:26037501-26038000	chr2:5056501-5057000	chr2:1987501-1989000
chr5:26209501-26210500	chr2:5057501-5058500	chr2:2018001-2018500
chr5:26277001-26277500	chr2:5080501-5081000	chr2:2034001-2034500
chr5:26289501-26290000	chr2:5109501-5110000	chr2:2041501-2042000
chr5:26483001-26483500	chr2:5111501-5112000	chr2:2053501-2054500
chr5:26484001-26485000	chr2:5113501-5114000	chr2:2058001-2060000
chr5:26670501-26671000	chr2:5119501-5120000	chr2:2060501-2061000
chr5:26787001-26787500	chr2:5215001-5215500	chr2:2065001-2065500
chr5:26835001-26835500	chr2:5465001-5466500	chr2:2066501-2067000
chr5:26892501-26893000	chr2:5557501-5558500	chr2:2074001-2074500
	chr2:5583501-5584500	chr2:2082001-2082500
	chr2:5586001-5586500	chr2:2085001-2086500
	chr2:5588501-5590000	chr2:2087001-2087500
	chr2:5598501-5599000	chr2:2089001-2089500
	chr2:5606001-5606500	chr2:2130001-2130500
	chr2:5636501-5637000	chr2:2131001-2131500
	chr2:5646001-5646500	chr2:2139001-2141500
	chr2:5648001-5648500	chr2:2148501-2149500
	chr2:5656501-5657000	chr2:2150001-2151000
	chr2:5658501-5659000	chr2:2156001-2156500
	chr2:5660001-5660500	chr2:2174001-2174500
	chr2:5670001-5671500	chr2:2178001-2178500
	chr2:5709001-5710000	chr2:2197001-2198000
	chr2:5728001-5728500	chr2:2212001-2212500
	chr2:5732501-5733000	chr2:2217001-2219500
	chr2:5739001-5740000	chr2:2223001-2224000
	chr2:5740501-5741500	chr2:2227001-2227500
	chr2:5761001-5761500	chr2:2232001-2232500
	chr2:5763001-5763500	chr2:2240501-2241000
	chr2:5765501-5766000	chr2:2246001-2246500
	chr2:5774501-5775500	chr2:2260501-2261000
	chr2:5779501-5780500	chr2:2262001-2262500
	chr2:5787001-5787500	chr2:2284001-2284500
	chr2:5788001-5788500	chr2:2296001-2296500
	chr2:5807501-5809000	chr2:2299001-2299500
	chr2:5814001-5815000	chr2:2311001-2312500
	chr2:5823001-5823500	chr2:2319501-2322000
	chr2:5837001-5837500	chr2:2332001-2332500
	chr2:5841001-5841500	chr2:2336501-2337000
	chr2:5842501-5843000	chr2:2362501-2363000
	chr2:5861001-5861500	chr2:2428501-2429000
	chr2:5865501-5866000	chr2:2456001-2456500
	chr2:5871501-5872500	chr2:2473001-2473500
	chr2:5874001-5874500	chr2:2518501-2519000
	chr2:5889501-5890000	chr2:2520501-2521000
	chr2:5905501-5906500	chr2:2521501-2522000
	chr2:5908501-5909000	chr2:2537501-2538000
	chr2:5917501-5918000	chr2:2542001-2542500
	chr2:5934001-5934500	chr2:2590501-2591000
	chr2:5940001-5940500	chr2:2591501-2592000
	chr2:5942001-5943000	chr2:2601001-2601500
	chr2:5943501-5944000	chr2:2604001-2604500
	chr2:5950001-5950500	chr2:2605501-2606000
	chr2:5960001-5960500	chr2:2606501-2607000
	chr2:5966001-5966500	chr2:2610501-2611000
	chr2:5975501-5976000	chr2:2655501-2656000
	chr2:6004501-6005000	chr2:2730501-2731500
	chr2:6013001-6014000	chr2:2762501-2763000
	chr2:6015501-6016000	chr2:2839501-2840000
	chr2:6036001-6036500	chr2:2843501-2844500
	chr2:6044001-6045500	chr2:2853001-2854500
	chr2:6046001-6046500	chr2:2923501-2924000
	chr2:6059501-6060000	chr2:2966001-2966500
	chr2:6084501-6085000	chr2:2980001-2980500
	chr2:6089501-6090000	chr2:2985001-2986000
	chr2:6101001-6102000	chr2:3014001-3014500
	chr2:6130501-6131000	chr2:3022501-3023000
	chr2:6139501-6140000	chr2:3075001-3075500
	chr2:6141001-6141500	chr2:3111001-3111500
	chr2:6162501-6163000	chr2:3513001-3514000
	chr2:6170501-6171000	chr2:3528001-3528500
	chr2:6180001-6181000	chr2:3530001-3530500
	chr2:6185001-6185500	chr2:3531001-3532000
	chr2:6206001-6207000	chr2:3534001-3534500
	chr2:6236001-6236500	chr2:3642001-3642500
	chr2:6249001-6251000	chr2:3985501-3986500
	chr2:6253501-6254000	chr2:4005001-4006000
	chr2:6261501-6262000	chr2:4007001-4007500
	chr2:6262501-6264500	chr2:4024001-4026000
	chr2:6270001-6271000	chr2:4078001-4078500
	chr2:6274501-6275000	chr2:4079001-4080000
	chr2:6288001-6289000	chr2:4097501-4098000
	chr2:6297501-6298000	chr2:4121001-4121500
	chr2:6305001-6305500	chr2:4140501-4141000
	chr2:6316001-6316500	chr2:4145001-4145500
	chr2:6321001-6321500	chr2:4262501-4263000
	chr2:6344501-6345000	chr2:4301501-4302000
	chr2:6350001-6351000	chr2:4302501-4303500
	chr2:6382501-6383500	chr2:4306001-4306500
	chr2:6390501-6391000	chr2:4313001-4313500
	chr2:6402501-6403000	chr2:4331501-4332000
	chr2:6405501-6406000	chr2:4338001-4338500
	chr2:6411001-6411500	chr2:4340501-4341000
	chr2:6415501-6416000	chr2:4348001-4348500
	chr2:6442501-6443500	chr2:4350001-4350500
	chr2:6450501-6451000	chr2:4353501-4354000
	chr2:6468501-6470000	chr2:4355001-4355500
	chr2:6494001-6494500	chr2:4415501-4416000
	chr2:6495001-6495500	chr2:4450501-4451000
	chr2:6497501-6498500	chr2:4456001-4457500
	chr2:6499001-6499500	chr2:4459001-4459500
	chr2:6522501-6523500	chr2:4472001-4472500
	chr2:6544001-6544500	chr2:4473501-4474500
	chr2:6546001-6547000	chr2:4476001-4477000
	chr2:6561001-6561500	chr2:4558501-4559000
	chr2:6566001-6566500	chr2:4565501-4566000
	chr2:6572001-6572500	chr2:4618001-4618500
	chr2:6578501-6579000	chr2:4758501-4759000
	chr2:6579501-6580000	chr2:4794501-4795000
	chr2:6629001-6630000	chr2:4796001-4796500
	chr2:6659001-6660000	chr2:4799001-4799500
	chr2:6660501-6661500	chr2:4893501-4894500
	chr2:6662001-6662500	chr2:4944001-4945500
	chr2:6663001-6663500	chr2:4965501-4966000
	chr2:6666001-6666500	chr2:5010001-5010500
	chr2:6668001-6668500	chr2:5018501-5019000
	chr2:6677501-6678000	chr2:5037501-5038000
	chr2:6678501-6680500	chr2:5048501-5049000
	chr2:6682501-6683000	chr2:5052001-5052500
	chr2:6691501-6692500	chr2:5053501-5054500
	chr2:6714501-6715000	chr2:5056501-5057000
	chr2:6716001-6716500	chr2:5080501-5081500
	chr2:6717001-6717500	chr2:5111501-5112000
	chr2:6729001-6729500	chr2:5113501-5114000
	chr2:6730501-6731000	chr2:5119501-5120000
	chr2:6733001-6733500	chr2:5215001-5215500
	chr2:6736001-6737000	chr2:5314001-5314500
	chr2:6738001-6740500	chr2:5465001-5466500
	chr2:6790501-6791000	chr2:5509501-5510000
	chr2:6803501-6804500	chr2:5515501-5516500
	chr2:6810001-6810500	chr2:5557501-5558500
	chr2:6813001-6813500	chr2:5583501-5584500
	chr2:6826501-6827000	chr2:5585501-5586500
	chr2:6854501-6855000	chr2:5588501-5590000
	chr2:6859001-6859500	chr2:5598501-5599000
	chr2:6870501-6871000	chr2:5606001-5606500
	chr2:6892001-6893500	chr2:5610501-5611000
	chr2:6900501-6902000	chr2:5612001-5613000
	chr2:6903001-6904000	chr2:5636501-5637000
	chr2:6922501-6925000	chr2:5644001-5644500
	chr2:6945001-6946500	chr2:5645501-5646500
	chr2:6948501-6949000	chr2:5648001-5648500
	chr2:6953001-6954000	chr2:5656501-5657000
	chr2:6975501-6976000	chr2:5658501-5659000
	chr2:6990001-6990500	chr2:5660001-5660500
	chr2:6992501-6993000	chr2:5670001-5670500
	chr2:7019501-7020000	chr2:5671001-5671500
	chr2:7043501-7044000	chr2:5709001-5710000
	chr2:7056501-7057000	chr2:5732501-5733000
	chr2:7066501-7067500	chr2:5740501-5741500
	chr2:7070501-7071000	chr2:5759501-5760000
	chr2:7073001-7073500	chr2:5761001-5761500
	chr2:7080501-7081000	chr2:5763001-5763500
	chr2:7093501-7094500	chr2:5765001-5766000
	chr2:7109501-7110000	chr2:5774501-5775500
	chr2:7112001-7112500	chr2:5779501-5781000
	chr2:7148001-7148500	chr2:5787001-5787500
	chr2:7153501-7154500	chr2:5788001-5788500
	chr2:7155501-7156000	chr2:5792001-5792500
	chr2:7161001-7161500	chr2:5807501-5809000
	chr2:7168501-7169000	chr2:5814001-5815000
	chr2:7176501-7177500	chr2:5836501-5837500
	chr2:7178001-7179000	chr2:5841001-5841500
	chr2:7193501-7194000	chr2:5842001-5843500
	chr2:7206501-7208000	chr2:5861001-5861500
	chr2:7224001-7224500	chr2:5865501-5866000
	chr2:7238501-7239000	chr2:5871501-5872500
	chr2:7242001-7243000	chr2:5874001-5874500
	chr2:7246501-7248000	chr2:5889501-5890000
	chr2:7257001-7257500	chr2:5905501-5906000
	chr2:7258001-7258500	chr2:5917501-5918000
	chr2:7278501-7279000	chr2:5934001-5934500
	chr2:7289501-7290500	chr2:5940001-5940500
	chr2:7292501-7293500	chr2:5942001-5943000
	chr2:7294501-7295500	chr2:5943501-5944000
	chr2:7327001-7328000	chr2:5946001-5946500
	chr2:7340501-7341000	chr2:5949501-5950500
	chr2:7348001-7348500	chr2:5960001-5960500
	chr2:7351001-7351500	chr2:5975501-5976000
	chr2:7371001-7371500	chr2:6004001-6005000
	chr2:7418501-7419500	chr2:6013001-6013500
	chr2:7421001-7422000	chr2:6015501-6016000
	chr2:7442001-7442500	chr2:6027001-6027500
	chr2:7496001-7496500	chr2:6036001-6036500
	chr2:7504001-7504500	chr2:6044001-6045500
	chr2:7536001-7537500	chr2:6046001-6046500
	chr2:7540001-7540500	chr2:6048501-6049000
	chr2:7566501-7567000	chr2:6059501-6060000
	chr2:7581001-7582500	chr2:6084501-6085500
	chr2:7583501-7584000	chr2:6089501-6090000
	chr2:7595001-7595500	chr2:6100001-6100500
	chr2:7622501-7623000	chr2:6101001-6102000
	chr2:7632501-7633000	chr2:6130501-6131000
	chr2:7650501-7651000	chr2:6139501-6140000
	chr2:7690001-7690500	chr2:6141501-6142000
	chr2:7691501-7692000	chr2:6162501-6163000
	chr2:7720501-7721000	chr2:6170501-6171000
	chr2:7721501-7722000	chr2:6180001-6181000
	chr2:7730001-7730500	chr2:6185001-6185500
	chr2:7766501-7767000	chr2:6206001-6207500
	chr2:7806001-7806500	chr2:6208001-6208500
	chr2:7807501-7808000	chr2:6236001-6236500
	chr2:7813501-7815500	chr2:6249001-6249500
	chr2:7844501-7845000	chr2:6250001-6251000
	chr2:7856001-7857000	chr2:6253501-6254000
	chr2:7875001-7875500	chr2:6261501-6262000
	chr2:7883501-7884000	chr2:6262501-6264000
	chr2:7886501-7887000	chr2:6270001-6271000
	chr2:7889501-7890000	chr2:6274501-6275000
	chr2:7905501-7907500	chr2:6288001-6289000
	chr2:7917001-7917500	chr2:6297001-6298000
	chr2:7950501-7951000	chr2:6305001-6305500
	chr2:7956001-7956500	chr2:6306001-6306500
	chr2:7959501-7960000	chr2:6317501-6318000
	chr2:7960501-7961500	chr2:6319001-6319500
	chr2:7976001-7976500	chr2:6321001-6321500
	chr2:8009001-8010000	chr2:6344501-6345000
	chr2:8016001-8016500	chr2:6350001-6351500
	chr2:8017001-8018000	chr2:6383001-6383500
	chr2:8028501-8029000	chr2:6390501-6391000
	chr2:8030501-8031000	chr2:6402501-6403000
	chr2:8045501-8046500	chr2:6405501-6406000
	chr2:8061001-8062000	chr2:6411001-6411500
	chr2:8077501-8078500	chr2:6415501-6416500
	chr2:8102501-8103500	chr2:6442501-6443500
	chr2:8166501-8167000	chr2:6450501-6451000
	chr2:8173001-8173500	chr2:6468501-6469500
	chr2:8200001-8200500	chr2:6494001-6494500
	chr2:8201001-8201500	chr2:6495001-6495500
	chr2:8231501-8232000	chr2:6497501-6499500
	chr2:8236501-8237500	chr2:6522001-6523500
	chr2:8302501-8303000	chr2:6544001-6544500
	chr2:8333001-8333500	chr2:6546001-6547000
	chr2:8379501-8380000	chr2:6561001-6561500
	chr2:8420501-8423000	chr2:6566001-6566500
	chr2:8436501-8437000	chr2:6572001-6572500
	chr2:8438001-8438500	chr2:6578501-6579000
	chr2:8452001-8453000	chr2:6629001-6630000
	chr2:8455501-8456000	chr2:6636501-6637000
	chr2:8535001-8535500	chr2:6649001-6649500
	chr2:8548001-8548500	chr2:6659001-6660000
	chr2:8554501-8555000	chr2:6661001-6662500
	chr2:8555501-8556000	chr2:6663001-6663500
	chr2:8569501-8570000	chr2:6666001-6666500
	chr2:8575001-8576000	chr2:6668001-6668500
	chr2:8578501-8579500	chr2:6677501-6678000
	chr2:8591001-8591500	chr2:6678501-6681000
	chr2:8622501-8623000	chr2:6682001-6683000
	chr2:8641501-8642000	chr2:6691501-6692500
	chr2:8658001-8658500	chr2:6707501-6708000
	chr2:8667001-8667500	chr2:6714501-6715000
	chr2:8854001-8855500	chr2:6716001-6717500
	chr2:8884001-8884500	chr2:6729001-6729500
	chr2:8885001-8885500	chr2:6730501-6731000
	chr2:8893501-8894000	chr2:6733001-6733500
	chr2:8894501-8895500	chr2:6736001-6737000
	chr2:8907501-8908500	chr2:6738001-6740500
	chr2:8911001-8911500	chr2:6790501-6791000
	chr2:8914001-8917500	chr2:6803501-6804500
	chr2:8957001-8957500	chr2:6810001-6810500
	chr2:8997501-8998000	chr2:6813001-6813500
	chr2:9005501-9006000	chr2:6826501-6827000
	chr2:9030001-9031000	chr2:6837001-6837500
	chr2:9038501-9039500	chr2:6854001-6855000
	chr2:9048001-9048500	chr2:6859001-6859500
	chr2:9056501-9057500	chr2:6870501-6871500
	chr2:9059001-9060000	chr2:6892001-6893500
	chr2:9063001-9063500	chr2:6900501-6902000
	chr2:9079501-9080000	chr2:6902501-6904500
	chr2:9091001-9091500	chr2:6922501-6925000
	chr2:9161501-9162000	chr2:6944501-6945500
	chr2:9225501-9226000	chr2:6946001-6946500
	chr2:9228501-9229500	chr2:6948501-6949000
	chr2:9234501-9235000	chr2:6953001-6954000
	chr2:9262501-9263000	chr2:6990001-6990500
	chr2:9289501-9290000	chr2:6992501-6993000
	chr2:9311001-9313000	chr2:6994501-6995000
	chr2:9314001-9315500	chr2:7019501-7020000
	chr2:9330501-9331000	chr2:7043501-7044000
	chr2:9344501-9345000	chr2:7056501-7057000
	chr2:9350001-9350500	chr2:7066501-7067500
	chr2:9402501-9403000	chr2:7070501-7071000
	chr2:9425001-9425500	chr2:7080501-7081000
	chr2:9432001-9432500	chr2:7093501-7094500
	chr2:9433001-9433500	chr2:7109501-7110000
	chr2:9455001-9455500	chr2:7112001-7113000
	chr2:9456001-9456500	chr2:7148001-7148500
	chr2:9470501-9471000	chr2:7149501-7150000
	chr2:9481501-9482000	chr2:7153501-7154500
	chr2:9484501-9485500	chr2:7155501-7156000
	chr2:9486501-9487000	chr2:7161001-7161500
	chr2:9559501-9560000	chr2:7168501-7169000
	chr2:9585001-9585500	chr2:7176501-7179000
	chr2:9594501-9596000	chr2:7193501-7194000
	chr2:9612001-9613000	chr2:7206501-7207500
	chr2:9633501-9634000	chr2:7224001-7224500
	chr2:9634501-9635500	chr2:7230501-7231000
	chr2:9643001-9643500	chr2:7238501-7239000
	chr2:9644001-9644500	chr2:7242001-7243000
	chr2:9654501-9656500	chr2:7247501-7248000
	chr2:9692001-9693500	chr2:7257001-7257500
	chr2:9713001-9713500	chr2:7258001-7258500
	chr2:9796501-9797500	chr2:7278501-7279000
	chr2:9836501-9837000	chr2:7289501-7290000
	chr2:9852001-9853000	chr2:7291001-7291500
	chr2:9855001-9855500	chr2:7292501-7293500
	chr2:9860001-9860500	chr2:7294501-7295500
	chr2:9896501-9897500	chr2:7327001-7328000
	chr2:9947001-9947500	chr2:7340501-7341000
	chr2:10001501-10002000	chr2:7348001-7348500
	chr2:10005501-10006500	chr2:7351001-7351500
	chr2:10018001-10020500	chr2:7371001-7371500
	chr2:10037501-10038000	chr2:7374501-7375000
	chr2:10040001-10040500	chr2:7418501-7419500
	chr2:10070001-10071000	chr2:7421001-7422000
	chr2:10085501-10086000	chr2:7439501-7440000
	chr2:10089501-10090000	chr2:7441501-7442500
	chr2:10151501-10152500	chr2:7458001-7458500
	chr2:10194501-10195000	chr2:7496001-7496500
	chr2:10198501-10199000	chr2:7504001-7504500
	chr2:10239001-10239500	chr2:7536001-7537500
	chr2:10255001-10256000	chr2:7538501-7539000
	chr2:10289501-10290000	chr2:7540001-7540500
	chr2:10306001-10306500	chr2:7566501-7567000
	chr2:10318001-10319000	chr2:7581001-7582500
	chr2:10351501-10352000	chr2:7583001-7584500
	chr2:10406501-10407000	chr2:7616001-7617000
	chr2:10435001-10435500	chr2:7622501-7623000
	chr2:10436001-10436500	chr2:7632501-7633000
	chr2:10437001-10437500	chr2:7650501-7651000
	chr2:10465501-10466500	chr2:7663001-7663500
	chr2:10467501-10469000	chr2:7691501-7692000
	chr2:10535501-10536000	chr2:7720501-7721000
	chr2:10553001-10553500	chr2:7721501-7722000
	chr2:10558001-10558500	chr2:7766501-7767000
	chr2:10562001-10562500	chr2:7806001-7806500
	chr2:10565501-10566500	chr2:7807501-7808000
	chr2:10590501-10591000	chr2:7813501-7815500
	chr2:10608501-10609000	chr2:7844501-7845000
	chr2:10621501-10622000	chr2:7856001-7857000
	chr2:10678001-10678500	chr2:7875001-7875500
	chr2:10682001-10683000	chr2:7883501-7884000
	chr2:10683501-10684000	chr2:7886001-7887000
	chr2:10687001-10688000	chr2:7889501-7890000
	chr2:10796501-10797500	chr2:7905501-7907500
	chr2:10806501-10807000	chr2:7917001-7917500
	chr2:10842001-10842500	chr2:7919501-7920000
	chr2:10931501-10932500	chr2:7950501-7951000
	chr2:10952001-10952500	chr2:7956001-7956500
	chr2:10973001-10974000	chr2:7959501-7960000
	chr2:10996001-10997000	chr2:7960501-7961500
	chr2:11014501-11015000	chr2:7976001-7976500
	chr2:11041001-11041500	chr2:7977501-7978000
	chr2:11043001-11043500	chr2:8009001-8010000
	chr2:11053001-11053500	chr2:8016001-8016500
	chr2:11066001-11066500	chr2:8017001-8018000
	chr2:11076001-11076500	chr2:8028001-8029500
	chr2:11100501-11101500	chr2:8030501-8031000
	chr2:11162501-11163000	chr2:8041501-8042000
	chr2:11164001-11164500	chr2:8045501-8046500
	chr2:11177001-11177500	chr2:8061001-8062000
	chr2:11217001-11217500	chr2:8077501-8078500
	chr2:11266001-11266500	chr2:8102501-8103500
	chr2:11267001-11267500	chr2:8166501-8167000
	chr2:11285001-11287000	chr2:8173001-8174000
	chr2:11303001-11303500	chr2:8181001-8181500
	chr2:11308501-11309000	chr2:8200001-8200500
	chr2:11315501-11316000	chr2:8201001-8202500
	chr2:11346501-11347000	chr2:8231501-8232000
	chr2:11397501-11399000	chr2:8236501-8237500
	chr2:11428501-11429000	chr2:8251501-8252000
	chr2:11502501-11503000	chr2:8300001-8300500
	chr2:11544501-11545000	chr2:8302501-8303000
	chr2:11555501-11556000	chr2:8333001-8333500
	chr2:11597001-11598000	chr2:8379501-8380000
	chr2:11619001-11619500	chr2:8420501-8423000
	chr2:11623501-11624000	chr2:8436501-8437000
	chr2:11643001-11643500	chr2:8438001-8438500
	chr2:11649001-11649500	chr2:8452501-8453000
	chr2:11663501-11664000	chr2:8455501-8456000
	chr2:11739501-11740000	chr2:8535001-8535500
	chr2:11786501-11787500	chr2:8554501-8555000
	chr2:11867001-11867500	chr2:8555501-8556000
	chr2:11909001-11909500	chr2:8569501-8570000
	chr2:11920501-11921000	chr2:8575001-8576000
	chr2:11949001-11949500	chr2:8578501-8579500
	chr2:11952501-11953500	chr2:8622501-8623000
	chr2:11964501-11965000	chr2:8641501-8642000
	chr2:11983001-11984000	chr2:8658001-8658500
	chr2:12076001-12076500	chr2:8667001-8667500
	chr2:12092501-12094000	chr2:8815501-8816000
	chr2:12144001-12144500	chr2:8854001-8855500
	chr2:12243001-12243500	chr2:8883501-8884500
	chr2:12309501-12310500	chr2:8885001-8885500
	chr2:12320501-12321000	chr2:8893501-8894000
	chr2:12398001-12398500	chr2:8894501-8895500
	chr2:12410001-12410500	chr2:8907501-8908500
	chr2:12413501-12414000	chr2:8911001-8911500
	chr2:12475501-12476000	chr2:8914001-8917500
	chr2:12554001-12556000	chr2:8957001-8957500
	chr2:12556501-12557000	chr2:8993501-8994000
	chr2:12566001-12566500	chr2:9005501-9006000
	chr2:12578001-12578500	chr2:9030001-9030500
	chr2:12622501-12623000	chr2:9038501-9039500
	chr2:12708501-12709000	chr2:9048001-9048500
	chr2:12725001-12726000	chr2:9056501-9057500
	chr2:12738501-12740500	chr2:9059001-9060000
	chr2:12780501-12781000	chr2:9063001-9063500
	chr2:12801501-12803000	chr2:9079501-9080000
	chr2:12809501-12810500	chr2:9091001-9091500
	chr2:12811501-12813000	chr2:9161501-9162000
	chr2:12833501-12834000	chr2:9225501-9226000
	chr2:12858001-12858500	chr2:9228501-9229500
	chr2:12876501-12877500	chr2:9234501-9235000
	chr2:12887001-12887500	chr2:9262501-9263000
	chr2:13065501-13066000	chr2:9289501-9290000
	chr2:13094501-13095000	chr2:9311001-9313500
	chr2:13101501-13102500	chr2:9314001-9315500
	chr2:13127001-13127500	chr2:9330501-9331000
	chr2:13160001-13161000	chr2:9344501-9345000
	chr2:13211001-13212000	chr2:9350001-9350500
	chr2:13227501-13228000	chr2:9402501-9403000
	chr2:13267001-13269000	chr2:9419501-9420000
	chr2:13300001-13300500	chr2:9425001-9425500
	chr2:13336001-13338000	chr2:9432001-9432500
	chr2:13374501-13375500	chr2:9433001-9433500
	chr2:13404001-13404500	chr2:9455001-9455500
	chr2:13421501-13422500	chr2:9456001-9456500
	chr2:13433001-13433500	chr2:9470501-9471000
	chr2:13560001-13560500	chr2:9485001-9485500
	chr2:13634001-13635000	chr2:9486501-9487000
	chr2:13661001-13661500	chr2:9559501-9560000
	chr2:13717001-13717500	chr2:9585001-9585500
	chr2:13793501-13794500	chr2:9594501-9596000
	chr2:13866001-13866500	chr2:9612001-9613000
	chr2:13885501-13886500	chr2:9633501-9634000
	chr2:13906501-13908500	chr2:9634501-9635500
	chr2:14190501-14191000	chr2:9643001-9643500
	chr2:14290501-14291000	chr2:9644001-9644500
	chr2:14311501-14312000	chr2:9654501-9656500
	chr2:14334501-14335500	chr2:9692001-9693500
	chr2:14363501-14364000	chr2:9713001-9713500
	chr2:14386501-14387000	chr2:9726501-9727000
	chr2:14392501-14393000	chr2:9797001-9798000
	chr2:14402001-14402500	chr2:9836501-9837000
	chr2:14405501-14406000	chr2:9852001-9853000
	chr2:14415001-14415500	chr2:9860001-9860500
	chr2:14417001-14419000	chr2:9896501-9897500
	chr2:14457001-14458500	chr2:9947001-9948000
	chr2:14553501-14555000	chr2:9979001-9979500
	chr2:14572001-14573000	chr2:10001501-10002000
	chr2:14595001-14595500	chr2:10009501-10010000
	chr2:14632001-14632500	chr2:10018001-10019500
	chr2:14676001-14676500	chr2:10020001-10020500
	chr2:14682501-14684000	chr2:10037501-10038000
	chr2:14810501-14812000	chr2:10040001-10040500
	chr2:14812501-14813000	chr2:10070001-10071000
	chr2:14822001-14822500	chr2:10085501-10086000
	chr2:14846501-14847000	chr2:10151501-10152500
	chr2:14860501-14861000	chr2:10194501-10195000
	chr2:14951501-14953000	chr2:10198501-10199000
	chr2:15097501-15098000	chr2:10239001-10239500
	chr2:15110001-15110500	chr2:10255001-10256000
	chr2:15134001-15135000	chr2:10306001-10306500
	chr2:15140501-15141500	chr2:10317501-10319000
	chr2:15190501-15191000	chr2:10351501-10352500
	chr2:15371001-15372000	chr2:10406501-10407000
	chr2:15402001-15402500	chr2:10435001-10435500
	chr2:15448501-15449000	chr2:10436001-10437500
	chr2:15566501-15568000	chr2:10465501-10466500
	chr2:15597001-15597500	chr2:10467001-10469000
	chr2:15733501-15734000	chr2:10512501-10513000
	chr2:16003501-16004000	chr2:10541001-10541500
	chr2:16008001-16008500	chr2:10549501-10550500
	chr2:16020501-16021500	chr2:10553001-10553500
	chr2:16022001-16022500	chr2:10558001-10558500
	chr2:16030001-16030500	chr2:10562001-10562500
	chr2:16117001-16117500	chr2:10565501-10566500
	chr2:16150501-16151500	chr2:10590501-10591000
	chr2:16302501-16303000	chr2:10621501-10622000
	chr2:16347501-16348000	chr2:10678001-10678500
	chr2:16364001-16364500	chr2:10682001-10684000
	chr2:16370501-16371000	chr2:10687001-10687500
	chr2:16379501-16381000	chr2:10776501-10777000
	chr2:16467001-16467500	chr2:10796501-10797500
	chr2:16556001-16556500	chr2:10806501-10807000
	chr2:16560501-16561000	chr2:10842001-10842500
	chr2:16575001-16575500	chr2:10880001-10880500
	chr2:16596001-16596500	chr2:10909001-10909500
	chr2:16603501-16604000	chr2:10931501-10932500
	chr2:16625501-16627000	chr2:10952001-10952500
	chr2:16798501-16799000	chr2:10973001-10974000
	chr2:16834001-16834500	chr2:10996001-10997000
	chr2:16876001-16877500	chr2:11014501-11015000
	chr2:16920501-16922000	chr2:11041001-11041500
	chr2:16952501-16953000	chr2:11053001-11053500
	chr2:16957001-16957500	chr2:11056001-11056500
	chr2:17095001-17095500	chr2:11066001-11066500
	chr2:17147001-17147500	chr2:11101001-11101500
	chr2:17253001-17255000	chr2:11162501-11163000
	chr2:17255501-17257000	chr2:11164001-11164500
	chr2:17289001-17289500	chr2:11177001-11177500
	chr2:17300001-17300500	chr2:11217001-11217500
	chr2:17307501-17308000	chr2:11266001-11266500
	chr2:17362501-17364000	chr2:11285001-11287000
	chr2:17487001-17489000	chr2:11303001-11303500
	chr2:17545501-17547000	chr2:11308501-11309000
	chr2:17904501-17905000	chr2:11315501-11316000
	chr2:17992501-17993500	chr2:11346501-11347000
	chr2:18092001-18092500	chr2:11397501-11399000
	chr2:18093001-18093500	chr2:11428501-11429000
	chr2:18106501-18107000	chr2:11502501-11503000
	chr2:18165501-18166000	chr2:11544501-11545000
	chr2:18353501-18354000	chr2:11555501-11556500
	chr2:18396001-18396500	chr2:11597001-11598000
	chr2:18594501-18595000	chr2:11619001-11620000
	chr2:18660001-18660500	chr2:11623501-11624000
	chr2:18702501-18703000	chr2:11643001-11644000
	chr2:18797501-18798000	chr2:11663501-11664000
	chr2:18803501-18804000	chr2:11721501-11722000
	chr2:18854001-18854500	chr2:11739501-11740000
	chr2:18878001-18878500	chr2:11770001-11770500
	chr2:18957501-18958000	chr2:11786501-11787500
	chr2:19143501-19144000	chr2:11867001-11867500
	chr2:19163001-19163500	chr2:11909001-11909500
	chr2:19172001-19172500	chr2:11920501-11921000
	chr2:19195501-19197000	chr2:11949001-11949500
	chr2:19220001-19220500	chr2:11952501-11953500
	chr2:19235501-19236500	chr2:11964501-11965000
	chr2:19242501-19243500	chr2:11982501-11984000
	chr2:19269001-19269500	chr2:12076001-12076500
	chr2:19322501-19324000	chr2:12092501-12094000
	chr2:19414001-19415000	chr2:12144001-12145000
	chr2:19433001-19433500	chr2:12243001-12243500
	chr2:19527501-19529000	chr2:12309501-12310500
	chr2:19623001-19623500	chr2:12320501-12321000
	chr2:19683501-19684000	chr2:12372501-12373000
	chr3:1-500	chr2:12398001-12398500
	chr3:42501-43000	chr2:12410001-12410500
	chr3:105501-106000	chr2:12413501-12414000
	chr3:132501-133000	chr2:12475501-12476000
	chr3:422501-423500	chr2:12554001-12556000
	chr3:451501-452000	chr2:12556501-12557000
	chr3:495501-496000	chr2:12566001-12566500
	chr3:557501-558000	chr2:12578001-12578500
	chr3:760001-760500	chr2:12622501-12623000
	chr3:826501-827000	chr2:12708501-12709000
	chr3:985501-986000	chr2:12725001-12726000
	chr3:1031001-1031500	chr2:12733001-12733500
	chr3:1057501-1058000	chr2:12738501-12740500
	chr3:1166001-1166500	chr2:12780501-12781000
	chr3:1170001-1171500	chr2:12801501-12803000
	chr3:1283501-1284000	chr2:12810001-12810500
	chr3:1341501-1342000	chr2:12811501-12813500
	chr3:1370001-1371000	chr2:12833501-12834000
	chr3:1385501-1386000	chr2:12858001-12858500
	chr3:1400001-1400500	chr2:12876501-12877500
	chr3:1571501-1572000	chr2:12886501-12887500
	chr3:1602001-1602500	chr2:13065501-13066000
	chr3:1607001-1607500	chr2:13067501-13068000
	chr3:1924001-1924500	chr2:13094501-13095000
	chr3:1928001-1928500	chr2:13101501-13102500
	chr3:1951501-1952000	chr2:13127001-13127500
	chr3:2138501-2139500	chr2:13160001-13161000
	chr3:2258501-2261000	chr2:13211001-13211500
	chr3:2360501-2361000	chr2:13223001-13223500
	chr3:2361501-2363000	chr2:13227501-13228000
	chr3:2601001-2601500	chr2:13267001-13269000
	chr3:2628501-2629500	chr2:13300001-13300500
	chr3:2648001-2648500	chr2:13336001-13338000
	chr3:2772501-2773000	chr2:13374501-13375500
	chr3:2773501-2774000	chr2:13404001-13404500
	chr3:2799001-2799500	chr2:13421501-13422500
	chr3:2849501-2850000	chr2:13433001-13433500
	chr3:2884001-2884500	chr2:13560001-13560500
	chr3:2920001-2920500	chr2:13634001-13635000
	chr3:2923001-2923500	chr2:13661001-13661500
	chr3:2970501-2971000	chr2:13793501-13794500
	chr3:2998001-2998500	chr2:13866001-13866500
	chr3:3080001-3081000	chr2:13885501-13886500
	chr3:3204501-3205500	chr2:13906501-13908500
	chr3:3263501-3264000	chr2:14063501-14064000
	chr3:3423501-3424000	chr2:14190501-14191000
	chr3:3478501-3479000	chr2:14290501-14291000
	chr3:3497501-3498000	chr2:14311501-14312000
	chr3:3538001-3539000	chr2:14334001-14335500
	chr3:3664001-3665000	chr2:14363501-14364000
	chr3:3716501-3717500	chr2:14386501-14387000
	chr3:3755001-3755500	chr2:14402001-14402500
	chr3:3837501-3839000	chr2:14405501-14406000
	chr3:3873501-3874500	chr2:14408001-14408500
	chr3:3965001-3966000	chr2:14415001-14415500
	chr3:3987501-3988500	chr2:14417001-14419000
	chr3:4118501-4119000	chr2:14457001-14458500
	chr3:4216501-4217000	chr2:14553501-14555500
	chr3:4263001-4263500	chr2:14572001-14573000
	chr3:4467501-4468500	chr2:14595001-14595500
	chr3:4494001-4495000	chr2:14636501-14637000
	chr3:4497501-4498000	chr2:14676001-14676500
	chr3:4551501-4552500	chr2:14682501-14684000
	chr3:4579001-4580000	chr2:14810501-14812000
	chr3:4585001-4585500	chr2:14812501-14813000
	chr3:4727001-4729500	chr2:14822001-14822500
	chr3:4745501-4746000	chr2:14846501-14847000
	chr3:4752001-4753500	chr2:14859501-14860000
	chr3:4796001-4797000	chr2:14860501-14861000
	chr3:4927501-4928000	chr2:14951501-14953000
	chr3:4930001-4930500	chr2:15110001-15110500
	chr3:4977001-4978000	chr2:15134001-15135000
	chr3:5137501-5138000	chr2:15140501-15141500
	chr3:5152001-5152500	chr2:15190501-15191000
	chr3:5164501-5165000	chr2:15371001-15372000
	chr3:5328501-5329000	chr2:15402001-15402500
	chr3:5377001-5378000	chr2:15448501-15449000
	chr3:5379001-5380500	chr2:15566501-15568000
	chr3:5437501-5438000	chr2:15597001-15597500
	chr3:5496001-5496500	chr2:15733501-15734000
	chr3:5590501-5591500	chr2:15821501-15822000
	chr3:5622001-5624000	chr2:15884501-15885000
	chr3:5629001-5629500	chr2:16020501-16021500
	chr3:5651001-5652500	chr2:16022001-16022500
	chr3:5729501-5730000	chr2:16030001-16031000
	chr3:5743501-5746000	chr2:16117001-16117500
	chr3:5779501-5780000	chr2:16150501-16151500
	chr3:5792501-5793500	chr2:16302501-16303000
	chr3:5835001-5835500	chr2:16347001-16348500
	chr3:5836001-5836500	chr2:16364001-16364500
	chr3:5839001-5840500	chr2:16379501-16381000
	chr3:5866001-5866500	chr2:16467001-16467500
	chr3:5929001-5931000	chr2:16537501-16538000
	chr3:5982501-5983000	chr2:16556001-16556500
	chr3:6052501-6053000	chr2:16560501-16561000
	chr3:6053501-6055000	chr2:16575001-16575500
	chr3:6073501-6074000	chr2:16588001-16588500
	chr3:6336001-6336500	chr2:16596001-16596500
	chr3:6344501-6345000	chr2:16603501-16604000
	chr3:6486001-6487500	chr2:16625501-16627000
	chr3:6576501-6577500	chr2:16742501-16743000
	chr3:6668501-6669000	chr2:16798501-16799000
	chr3:6717501-6718000	chr2:16834001-16835000
	chr3:6729001-6729500	chr2:16876001-16877500
	chr3:6771001-6772500	chr2:16920501-16922000
	chr3:6940501-6943000	chr2:16952501-16953000
	chr3:6978001-6978500	chr2:16957001-16958000
	chr3:6991501-6992000	chr2:17147001-17147500
	chr3:7094001-7094500	chr2:17253001-17255000
	chr3:7143001-7143500	chr2:17255501-17257000
	chr3:7194001-7194500	chr2:17275001-17275500
	chr3:7274501-7275000	chr2:17277501-17278000
	chr3:7279001-7280000	chr2:17289001-17289500
	chr3:7288001-7288500	chr2:17300001-17300500
	chr3:7291001-7292000	chr2:17307501-17308000
	chr3:7318501-7319500	chr2:17363001-17364000
	chr3:7342001-7342500	chr2:17418001-17418500
[truncated: 2,631 more rows]
