# Supplementary material for: A novel histone H3K4me1-specific binding protein is required for siRNA accumulation and DNA methylation at a subset of loci targeted by RNA-directed DNA methylation
Source: Research Square preprint supplement (doi:10.21203/rs.3.rs-98860/v1), 2020-11-04
Supplement: Supplementary file 2 [file 4e04957d0a5faf2feec3f3aa.xlsx]

## Sheet: Sheet1
chr1:601-800
chr1:801-1000
chr1:42201-42400
chr1:42401-42600
chr1:76801-77000
chr1:213601-213800
chr1:239201-239400
chr1:372601-372800
chr1:428001-428200
chr1:670601-670800
chr1:789401-789600
chr1:789601-789800
chr1:944001-944200
chr1:1250601-1250800
chr1:1544401-1544600
chr1:1593001-1593200
chr1:1728601-1728800
chr1:1739001-1739200
chr1:1876601-1876800
chr1:2335201-2335400
chr1:2526801-2527000
chr1:3428001-3428200
chr1:3573001-3573200
chr1:3730201-3730400
chr1:3980801-3981000
chr1:3988001-3988200
chr1:4061401-4061600
chr1:4416001-4416200
chr1:4597001-4597200
chr1:4611601-4611800
chr1:4705201-4705400
chr1:4705401-4705600
chr1:4708201-4708400
chr1:4738601-4738800
chr1:4860201-4860400
chr1:4860401-4860600
chr1:4966801-4967000
chr1:5171801-5172000
chr1:5172001-5172200
chr1:5198401-5198600
chr1:5359001-5359200
chr1:5866801-5867000
chr1:5867001-5867200
chr1:5975601-5975800
chr1:6119401-6119600
chr1:6173401-6173600
chr1:6261601-6261800
chr1:6573801-6574000
chr1:6574001-6574200
chr1:6615401-6615600
chr1:6615601-6615800
chr1:7027001-7027200
chr1:7077801-7078000
chr1:7227601-7227800
chr1:7227801-7228000
chr1:7251801-7252000
chr1:7313001-7313200
chr1:7313201-7313400
chr1:7394601-7394800
chr1:7522201-7522400
chr1:7528001-7528200
chr1:7541201-7541400
chr1:7665401-7665600
chr1:7665801-7666000
chr1:7683201-7683400
chr1:7724801-7725000
chr1:7766201-7766400
chr1:7766401-7766600
chr1:7783801-7784000
chr1:7852001-7852200
chr1:7852201-7852400
chr1:7935601-7935800
chr1:7981201-7981400
chr1:8036001-8036200
chr1:8044001-8044200
chr1:8154201-8154400
chr1:8252401-8252600
chr1:8255001-8255200
chr1:8320401-8320600
chr1:8471801-8472000
chr1:8472001-8472200
chr1:8473201-8473400
chr1:8475201-8475400
chr1:8476201-8476400
chr1:8515401-8515600
chr1:8538601-8538800
chr1:8573401-8573600
chr1:8578001-8578200
chr1:8591201-8591400
chr1:8623401-8623600
chr1:8738801-8739000
chr1:8740801-8741000
chr1:8741401-8741600
chr1:8764601-8764800
chr1:8899401-8899600
chr1:8899601-8899800
chr1:9001001-9001200
chr1:9001201-9001400
chr1:9082601-9082800
chr1:9106201-9106400
chr1:9173601-9173800
chr1:9203001-9203200
chr1:9253801-9254000
chr1:9254001-9254200
chr1:9292001-9292200
chr1:9292201-9292400
chr1:9432201-9432400
chr1:9454001-9454200
chr1:9547001-9547200
chr1:9548201-9548400
chr1:9550801-9551000
chr1:9551001-9551200
chr1:9564601-9564800
chr1:9564801-9565000
chr1:9565001-9565200
chr1:9583801-9584000
chr1:9627001-9627200
chr1:9630601-9630800
chr1:9759201-9759400
chr1:9759401-9759600
chr1:9778601-9778800
chr1:9812201-9812400
chr1:9829201-9829400
chr1:9829401-9829600
chr1:9863001-9863200
chr1:9879801-9880000
chr1:9883801-9884000
chr1:9901601-9901800
chr1:9901801-9902000
chr1:9925201-9925400
chr1:9939201-9939400
chr1:9958601-9958800
chr1:10003601-10003800
chr1:10005801-10006000
chr1:10013201-10013400
chr1:10013401-10013600
chr1:10060601-10060800
chr1:10173201-10173400
chr1:10197001-10197200
chr1:10221001-10221200
chr1:10221201-10221400
chr1:10330001-10330200
chr1:10362801-10363000
chr1:10383201-10383400
chr1:10421601-10421800
chr1:10512601-10512800
chr1:10524601-10524800
chr1:10546001-10546200
chr1:10666001-10666200
chr1:10666201-10666400
chr1:10775601-10775800
chr1:10777401-10777600
chr1:10922401-10922600
chr1:11006601-11006800
chr1:11044001-11044200
chr1:11083001-11083200
chr1:11111201-11111400
chr1:11112001-11112200
chr1:11155001-11155200
chr1:11209001-11209200
chr1:11259401-11259600
chr1:11281001-11281200
chr1:11378401-11378600
chr1:11421201-11421400
chr1:11422001-11422200
chr1:11478801-11479000
chr1:11493001-11493200
chr1:11493201-11493400
chr1:11493401-11493600
chr1:11516001-11516200
chr1:11536601-11536800
chr1:11550401-11550600
chr1:11552001-11552200
chr1:11592601-11592800
chr1:11592801-11593000
chr1:11661001-11661200
chr1:11661201-11661400
chr1:11687001-11687200
chr1:11692401-11692600
chr1:11693201-11693400
chr1:11703601-11703800
chr1:11703801-11704000
chr1:11783201-11783400
chr1:11805001-11805200
chr1:11826201-11826400
chr1:11861601-11861800
chr1:11910801-11911000
chr1:11935401-11935600
chr1:11979801-11980000
chr1:12059801-12060000
chr1:12060001-12060200
chr1:12071401-12071600
chr1:12131401-12131600
chr1:12177001-12177200
chr1:12215001-12215200
chr1:12215201-12215400
chr1:12231201-12231400
chr1:12255401-12255600
chr1:12264601-12264800
chr1:12272001-12272200
chr1:12310601-12310800
chr1:12325601-12325800
chr1:12333601-12333800
chr1:12336201-12336400
chr1:12389601-12389800
chr1:12389801-12390000
chr1:12435001-12435200
chr1:12435201-12435400
chr1:12435401-12435600
chr1:12455201-12455400
chr1:12471401-12471600
chr1:12471601-12471800
chr1:12475601-12475800
chr1:12483201-12483400
chr1:12519601-12519800
chr1:12519801-12520000
chr1:12548201-12548400
chr1:12561401-12561600
chr1:12564201-12564400
chr1:12581601-12581800
chr1:12610601-12610800
chr1:12618401-12618600
chr1:12633201-12633400
chr1:12643001-12643200
chr1:12643201-12643400
chr1:12643801-12644000
chr1:12645201-12645400
chr1:12646001-12646200
chr1:12653001-12653200
chr1:12653201-12653400
chr1:12688801-12689000
chr1:12738401-12738600
chr1:12870001-12870200
chr1:12870201-12870400
chr1:12889801-12890000
chr1:12894801-12895000
chr1:12908201-12908400
chr1:12916001-12916200
chr1:12918601-12918800
chr1:12958401-12958600
chr1:12958601-12958800
chr1:12961801-12962000
chr1:12962001-12962200
chr1:12963601-12963800
chr1:12966601-12966800
chr1:12966801-12967000
chr1:12980401-12980600
chr1:13024801-13025000
chr1:13025001-13025200
chr1:13027801-13028000
chr1:13034001-13034200
chr1:13037201-13037400
chr1:13042801-13043000
chr1:13049601-13049800
chr1:13049801-13050000
chr1:13055401-13055600
chr1:13062401-13062600
chr1:13070601-13070800
chr1:13081801-13082000
chr1:13089201-13089400
chr1:13104201-13104400
chr1:13104401-13104600
chr1:13112201-13112400
chr1:13121601-13121800
chr1:13128201-13128400
chr1:13128401-13128600
chr1:13150201-13150400
chr1:13150401-13150600
chr1:13154001-13154200
chr1:13155801-13156000
chr1:13159801-13160000
chr1:13160801-13161000
chr1:13166201-13166400
chr1:13171201-13171400
chr1:13215201-13215400
chr1:13216001-13216200
chr1:13352001-13352200
chr1:13357601-13357800
chr1:13371401-13371600
chr1:13461401-13461600
chr1:13463401-13463600
chr1:13463601-13463800
chr1:13465801-13466000
chr1:13502601-13502800
chr1:13548001-13548200
chr1:13548201-13548400
chr1:13643601-13643800
chr1:13684601-13684800
chr1:13686801-13687000
chr1:13699401-13699600
chr1:13825201-13825400
chr1:13837801-13838000
chr1:14000401-14000600
chr1:14002601-14002800
chr1:14011001-14011200
chr1:14303401-14303600
chr1:14998801-14999000
chr1:15663401-15663600
chr1:15881601-15881800
chr1:15905601-15905800
chr1:15905801-15906000
chr1:15925401-15925600
chr1:15982801-15983000
chr1:16116201-16116400
chr1:16134001-16134200
chr1:16135601-16135800
chr1:16156601-16156800
chr1:16231801-16232000
chr1:16307601-16307800
chr1:16316601-16316800
chr1:16413401-16413600
chr1:16413601-16413800
chr1:16414001-16414200
chr1:16414401-16414600
chr1:16430401-16430600
chr1:16439001-16439200
chr1:16466601-16466800
chr1:16474201-16474400
chr1:16491801-16492000
chr1:16541401-16541600
chr1:16546201-16546400
chr1:16658201-16658400
chr1:16667201-16667400
chr1:16667401-16667600
chr1:16670201-16670400
chr1:16711201-16711400
chr1:16754801-16755000
chr1:16755001-16755200
chr1:16761601-16761800
chr1:16773401-16773600
chr1:16778001-16778200
chr1:16792401-16792600
chr1:16799401-16799600
chr1:16810801-16811000
chr1:16830401-16830600
chr1:16866801-16867000
chr1:16878001-16878200
chr1:16878201-16878400
chr1:16891001-16891200
chr1:16892001-16892200
chr1:16902601-16902800
chr1:16925401-16925600
chr1:16935601-16935800
chr1:16937801-16938000
chr1:16969201-16969400
chr1:16969401-16969600
chr1:16974801-16975000
chr1:17021801-17022000
chr1:17095201-17095400
chr1:17104801-17105000
chr1:17109801-17110000
chr1:17116401-17116600
chr1:17137801-17138000
chr1:17143001-17143200
chr1:17171801-17172000
chr1:17178601-17178800
chr1:17193401-17193600
chr1:17195601-17195800
chr1:17196801-17197000
chr1:17201401-17201600
chr1:17217601-17217800
chr1:17240001-17240200
chr1:17247401-17247600
chr1:17274201-17274400
chr1:17299801-17300000
chr1:17300001-17300200
chr1:17305601-17305800
chr1:17381401-17381600
chr1:17402601-17402800
chr1:17404401-17404600
chr1:17414601-17414800
chr1:17416601-17416800
chr1:17416801-17417000
chr1:17418401-17418600
chr1:17431001-17431200
chr1:17431201-17431400
chr1:17441401-17441600
chr1:17447801-17448000
chr1:17448001-17448200
chr1:17503201-17503400
chr1:17512801-17513000
chr1:17514201-17514400
chr1:17551001-17551200
chr1:17577001-17577200
chr1:17579201-17579400
chr1:17615201-17615400
chr1:17634001-17634200
chr1:17639401-17639600
chr1:17652601-17652800
chr1:17655001-17655200
chr1:17666601-17666800
chr1:17712801-17713000
chr1:17715201-17715400
chr1:17759001-17759200
chr1:17759201-17759400
chr1:17837801-17838000
chr1:17838601-17838800
chr1:17840801-17841000
chr1:17856401-17856600
chr1:17861001-17861200
chr1:17861201-17861400
chr1:17899001-17899200
chr1:17939001-17939200
chr1:17980001-17980200
chr1:18010201-18010400
chr1:18029601-18029800
chr1:18033601-18033800
chr1:18033801-18034000
chr1:18047801-18048000
chr1:18048201-18048400
chr1:18078601-18078800
chr1:18214001-18214200
chr1:18270401-18270600
chr1:18304401-18304600
chr1:18338201-18338400
chr1:18458001-18458200
chr1:18458201-18458400
chr1:18493601-18493800
chr1:18541401-18541600
chr1:18599001-18599200
chr1:18643601-18643800
chr1:18643801-18644000
chr1:18649001-18649200
chr1:18759001-18759200
chr1:18759201-18759400
chr1:18768201-18768400
chr1:18817401-18817600
chr1:18874201-18874400
chr1:18885801-18886000
chr1:18892201-18892400
chr1:18892601-18892800
chr1:18930801-18931000
chr1:18957201-18957400
chr1:18974001-18974200
chr1:18983601-18983800
chr1:18994801-18995000
chr1:19212401-19212600
chr1:19212601-19212800
chr1:19219801-19220000
chr1:19220001-19220200
chr1:19233801-19234000
chr1:19234801-19235000
chr1:19235001-19235200
chr1:19247801-19248000
chr1:19248001-19248200
chr1:19319801-19320000
chr1:19330001-19330200
chr1:19362801-19363000
chr1:19363001-19363200
chr1:19368401-19368600
chr1:19373001-19373200
chr1:19398401-19398600
chr1:19400001-19400200
chr1:19404201-19404400
chr1:19406001-19406200
chr1:19415201-19415400
chr1:19426801-19427000
chr1:19593601-19593800
chr1:19594601-19594800
chr1:19630601-19630800
chr1:19630801-19631000
chr1:19675201-19675400
chr1:19720601-19720800
chr1:19744001-19744200
chr1:19744201-19744400
chr1:19749601-19749800
chr1:19749801-19750000
chr1:19861201-19861400
chr1:19876001-19876200
chr1:19941401-19941600
chr1:20032601-20032800
chr1:20032801-20033000
chr1:20106601-20106800
chr1:20106801-20107000
chr1:20112601-20112800
chr1:20119001-20119200
chr1:20125201-20125400
chr1:20127801-20128000
chr1:20131601-20131800
chr1:20187401-20187600
chr1:20273201-20273400
chr1:20367201-20367400
chr1:20367401-20367600
chr1:20403401-20403600
chr1:20422801-20423000
chr1:20423201-20423400
chr1:20437801-20438000
chr1:20462601-20462800
chr1:20498801-20499000
chr1:20510201-20510400
chr1:20532201-20532400
chr1:20539401-20539600
chr1:20540801-20541000
chr1:20541001-20541200
chr1:20548001-20548200
chr1:20564801-20565000
chr1:20624801-20625000
chr1:20649201-20649400
chr1:20778001-20778200
chr1:20820201-20820400
chr1:20823601-20823800
chr1:20913801-20914000
chr1:21038001-21038200
chr1:21107001-21107200
chr1:21114601-21114800
chr1:21120401-21120600
chr1:21131801-21132000
chr1:21180001-21180200
chr1:21188601-21188800
chr1:21211801-21212000
chr1:21223801-21224000
chr1:21311801-21312000
chr1:21335201-21335400
chr1:21360201-21360400
chr1:21365401-21365600
chr1:21374401-21374600
chr1:21374601-21374800
chr1:21374801-21375000
chr1:21418401-21418600
chr1:21444001-21444200
chr1:21462801-21463000
chr1:21510001-21510200
chr1:21518401-21518600
chr1:21581801-21582000
chr1:21586201-21586400
chr1:21628801-21629000
chr1:21630801-21631000
chr1:21672401-21672600
chr1:21681401-21681600
chr1:21719601-21719800
chr1:21731201-21731400
chr1:21766601-21766800
chr1:21771801-21772000
chr1:21772001-21772200
chr1:21779201-21779400
chr1:21785001-21785200
chr1:21786801-21787000
chr1:21787001-21787200
chr1:21790801-21791000
chr1:21802801-21803000
chr1:21808201-21808400
chr1:21815401-21815600
chr1:21821401-21821600
chr1:21823001-21823200
chr1:21827001-21827200
chr1:21839001-21839200
chr1:21844401-21844600
chr1:21844801-21845000
chr1:21859001-21859200
chr1:21947201-21947400
chr1:21977001-21977200
chr1:22024801-22025000
chr1:22025001-22025200
chr1:22042801-22043000
chr1:22067601-22067800
chr1:22075201-22075400
chr1:22079801-22080000
chr1:22086401-22086600
chr1:22086601-22086800
chr1:22182801-22183000
chr1:22183001-22183200
chr1:22226601-22226800
chr1:22269601-22269800
chr1:22270201-22270400
chr1:22330601-22330800
chr1:22330801-22331000
chr1:22357001-22357200
chr1:22418001-22418200
chr1:22443801-22444000
chr1:22626001-22626200
chr1:22627401-22627600
chr1:22732001-22732200
chr1:22777401-22777600
chr1:22855201-22855400
chr1:22855601-22855800
chr1:22885401-22885600
chr1:22890401-22890600
chr1:22985601-22985800
chr1:23004401-23004600
chr1:23004601-23004800
chr1:23021201-23021400
chr1:23093801-23094000
chr1:23149201-23149400
chr1:23149401-23149600
chr1:23149801-23150000
chr1:23165001-23165200
chr1:23190601-23190800
chr1:23212601-23212800
chr1:23312801-23313000
chr1:23313001-23313200
chr1:23430801-23431000
chr1:23477001-23477200
chr1:23586401-23586600
chr1:23639801-23640000
chr1:23640001-23640200
chr1:23651801-23652000
chr1:23723801-23724000
chr1:23735001-23735200
chr1:23735201-23735400
chr1:23736801-23737000
chr1:23755401-23755600
chr1:23856201-23856400
chr1:23862001-23862200
chr1:23862201-23862400
chr1:23946801-23947000
chr1:23947001-23947200
chr1:23966201-23966400
chr1:24039601-24039800
chr1:24041801-24042000
chr1:24082201-24082400
chr1:24082401-24082600
chr1:24082601-24082800
chr1:24101601-24101800
chr1:24119401-24119600
chr1:24223201-24223400
chr1:24223401-24223600
chr1:24265001-24265200
chr1:24272001-24272200
chr1:24281401-24281600
chr1:24291001-24291200
chr1:24337801-24338000
chr1:24338001-24338200
chr1:24338201-24338400
chr1:24369401-24369600
chr1:24385001-24385200
chr1:24409801-24410000
chr1:24447201-24447400
chr1:24447401-24447600
chr1:24453801-24454000
chr1:24455001-24455200
chr1:24462401-24462600
chr1:24462601-24462800
chr1:24506401-24506600
chr1:24508201-24508400
chr1:24565401-24565600
chr1:24567601-24567800
chr1:24572001-24572200
chr1:24572201-24572400
chr1:24593601-24593800
chr1:24675601-24675800
chr1:24675801-24676000
chr1:24691801-24692000
chr1:24692001-24692200
chr1:24717801-24718000
chr1:24835401-24835600
chr1:24871401-24871600
chr1:24885601-24885800
chr1:24894201-24894400
chr1:24897401-24897600
chr1:24917601-24917800
chr1:24918401-24918600
chr1:24956801-24957000
chr1:25005601-25005800
chr1:25036201-25036400
chr1:25058001-25058200
chr1:25058201-25058400
chr1:25150801-25151000
chr1:25204001-25204200
chr1:25217401-25217600
chr1:25274801-25275000
chr1:25275001-25275200
chr1:25327001-25327200
chr1:25384601-25384800
chr1:25490601-25490800
chr1:25581201-25581400
chr1:25594601-25594800
chr1:25674001-25674200
chr1:25676601-25676800
chr1:25696401-25696600
chr1:25705001-25705200
chr1:25723401-25723600
chr1:25728601-25728800
chr1:25730001-25730200
chr1:25750201-25750400
chr1:25750801-25751000
chr1:25831401-25831600
chr1:25831601-25831800
chr1:25929401-25929600
chr1:25975801-25976000
chr1:26111001-26111200
chr1:26140201-26140400
chr1:26268001-26268200
chr1:26425801-26426000
chr1:26561201-26561400
chr1:26561401-26561600
chr1:26712201-26712400
chr1:26771201-26771400
chr1:26993801-26994000
chr1:27117801-27118000
chr1:27334001-27334200
chr1:27434201-27434400
chr1:27434401-27434600
chr1:27603401-27603600
chr1:27635801-27636000
chr1:27933401-27933600
chr1:27972001-27972200
chr1:28188801-28189000
chr1:28259201-28259400
chr1:28259401-28259600
chr1:28280401-28280600
chr1:28421601-28421800
chr1:28515001-28515200
chr1:28515401-28515600
chr1:28515601-28515800
chr1:28516001-28516200
chr1:28592601-28592800
chr1:28592801-28593000
chr1:28815801-28816000
chr1:28843201-28843400
chr1:28843801-28844000
chr1:28844001-28844200
chr1:29250001-29250200
chr1:29263801-29264000
chr1:29337001-29337200
chr1:29469801-29470000
chr1:29590201-29590400
chr1:29769001-29769200
chr1:29940201-29940400
chr1:29940401-29940600
chr1:30019401-30019600
chr1:30068801-30069000
chr2:49801-50000
chr2:52801-53000
chr2:58401-58600
chr2:70401-70600
chr2:98401-98600
chr2:98601-98800
chr2:134801-135000
chr2:178401-178600
chr2:178601-178800
chr2:184601-184800
chr2:187401-187600
chr2:203401-203600
chr2:205401-205600
chr2:239001-239200
chr2:252401-252600
chr2:267801-268000
chr2:282601-282800
chr2:288601-288800
chr2:350401-350600
chr2:373001-373200
chr2:392601-392800
chr2:416001-416200
chr2:448201-448400
chr2:448401-448600
chr2:448601-448800
chr2:455801-456000
chr2:473801-474000
chr2:564401-564600
chr2:592601-592800
chr2:592801-593000
chr2:616601-616800
chr2:623601-623800
chr2:623801-624000
chr2:636801-637000
chr2:637201-637400
chr2:677601-677800
chr2:704401-704600
chr2:712801-713000
chr2:715001-715200
chr2:722201-722400
chr2:723201-723400
chr2:727801-728000
chr2:734601-734800
chr2:742001-742200
chr2:749401-749600
chr2:752401-752600
chr2:768401-768600
chr2:817401-817600
chr2:818801-819000
chr2:840601-840800
chr2:893801-894000
chr2:981601-981800
chr2:993201-993400
chr2:993401-993600
chr2:998601-998800
chr2:999001-999200
chr2:1018801-1019000
chr2:1019001-1019200
chr2:1027601-1027800
chr2:1107001-1107200
chr2:1112801-1113000
chr2:1147801-1148000
chr2:1170201-1170400
chr2:1170401-1170600
chr2:1172601-1172800
chr2:1178801-1179000
chr2:1237001-1237200
chr2:1242801-1243000
chr2:1258801-1259000
chr2:1259001-1259200
chr2:1263201-1263400
chr2:1263401-1263600
chr2:1272201-1272400
chr2:1279601-1279800
chr2:1318401-1318600
chr2:1318601-1318800
chr2:1326801-1327000
chr2:1343401-1343600
chr2:1351801-1352000
chr2:1352001-1352200
chr2:1360801-1361000
chr2:1361001-1361200
chr2:1362401-1362600
chr2:1371801-1372000
chr2:1380401-1380600
chr2:1392801-1393000
chr2:1425201-1425400
chr2:1469401-1469600
chr2:1497601-1497800
chr2:1504001-1504200
chr2:1504401-1504600
chr2:1536201-1536400
chr2:1543001-1543200
chr2:1562601-1562800
chr2:1565001-1565200
chr2:1567201-1567400
chr2:1572401-1572600
chr2:1593001-1593200
chr2:1593201-1593400
chr2:1594001-1594200
chr2:1599401-1599600
chr2:1649001-1649200
chr2:1649201-1649400
chr2:1656001-1656200
chr2:1656201-1656400
chr2:1656401-1656600
chr2:1656601-1656800
chr2:1676201-1676400
chr2:1676401-1676600
chr2:1686801-1687000
chr2:1692201-1692400
chr2:1695801-1696000
chr2:1711201-1711400
chr2:1733201-1733400
chr2:1857801-1858000
chr2:1863201-1863400
chr2:1866401-1866600
chr2:1866601-1866800
chr2:1878601-1878800
chr2:1897801-1898000
chr2:1904201-1904400
chr2:1905401-1905600
chr2:1917201-1917400
chr2:1917401-1917600
chr2:1917601-1917800
chr2:1966801-1967000
chr2:1968401-1968600
chr2:2031801-2032000
chr2:2088801-2089000
chr2:2293601-2293800
chr2:2301601-2301800
chr2:2302401-2302600
chr2:2318801-2319000
chr2:2346401-2346600
chr2:2349601-2349800
chr2:2414001-2414200
chr2:2425801-2426000
chr2:2428201-2428400
chr2:2428401-2428600
chr2:2518801-2519000
chr2:2760601-2760800
chr2:2762601-2762800
chr2:2892601-2892800
chr2:2902401-2902600
chr2:2922801-2923000
chr2:2940201-2940400
chr2:2974401-2974600
chr2:2980601-2980800
chr2:3060801-3061000
chr2:3155801-3156000
chr2:4106801-4107000
chr2:4108401-4108600
chr2:4313401-4313600
chr2:4475201-4475400
chr2:4651601-4651800
chr2:4805201-4805400
chr2:4872401-4872600
chr2:5004201-5004400
chr2:5018401-5018600
chr2:5389201-5389400
chr2:5392801-5393000
chr2:5410601-5410800
chr2:5495801-5496000
chr2:5496001-5496200
chr2:5537601-5537800
chr2:5542001-5542200
chr2:5598401-5598600
chr2:5691401-5691600
chr2:5691601-5691800
chr2:5773001-5773200
chr2:5788201-5788400
chr2:5791601-5791800
chr2:5831201-5831400
chr2:5831401-5831600
chr2:5835401-5835600
chr2:5835601-5835800
chr2:5837201-5837400
chr2:5872201-5872400
chr2:5874201-5874400
chr2:5876401-5876600
chr2:5876601-5876800
chr2:5923201-5923400
chr2:5924801-5925000
chr2:5925801-5926000
chr2:5976001-5976200
chr2:6016801-6017000
chr2:6173601-6173800
chr2:6180601-6180800
chr2:6238001-6238200
chr2:6274601-6274800
chr2:6274801-6275000
chr2:6276801-6277000
chr2:6288601-6288800
chr2:6305001-6305200
chr2:6319401-6319600
chr2:6354001-6354200
chr2:6390201-6390400
chr2:6391401-6391600
chr2:6391601-6391800
chr2:6391801-6392000
chr2:6397601-6397800
chr2:6405601-6405800
chr2:6414601-6414800
chr2:6468601-6468800
chr2:6502801-6503000
chr2:6540401-6540600
chr2:6612001-6612200
chr2:6619601-6619800
chr2:6634601-6634800
chr2:6666201-6666400
chr2:6668201-6668400
chr2:6674401-6674600
chr2:6677401-6677600
chr2:6677601-6677800
chr2:6731601-6731800
chr2:6732001-6732200
chr2:6732201-6732400
chr2:6765401-6765600
chr2:6790401-6790600
chr2:6795201-6795400
chr2:6814001-6814200
chr2:6873201-6873400
chr2:6916001-6916200
chr2:6926001-6926200
chr2:6926401-6926600
chr2:6926601-6926800
chr2:6948801-6949000
chr2:6985801-6986000
chr2:6986601-6986800
chr2:7005201-7005400
chr2:7024201-7024400
chr2:7033401-7033600
chr2:7057001-7057200
chr2:7060801-7061000
chr2:7080601-7080800
chr2:7084801-7085000
chr2:7085001-7085200
chr2:7085201-7085400
chr2:7089201-7089400
chr2:7093401-7093600
chr2:7167801-7168000
chr2:7168001-7168200
chr2:7171201-7171400
chr2:7171601-7171800
chr2:7220001-7220200
chr2:7246601-7246800
chr2:7256801-7257000
chr2:7278601-7278800
chr2:7278801-7279000
chr2:7370801-7371000
chr2:7371001-7371200
chr2:7374601-7374800
chr2:7377201-7377400
chr2:7377401-7377600
chr2:7458001-7458200
chr2:7527801-7528000
chr2:7528001-7528200
chr2:7549001-7549200
chr2:7549201-7549400
chr2:7587401-7587600
chr2:7595401-7595600
chr2:7622601-7622800
chr2:7678001-7678200
chr2:7678201-7678400
chr2:7680601-7680800
chr2:7690201-7690400
chr2:7690401-7690600
chr2:7708401-7708600
chr2:7708601-7708800
chr2:7719801-7720000
chr2:7721401-7721600
chr2:7721601-7721800
chr2:7806001-7806200
chr2:7807601-7807800
chr2:7807801-7808000
chr2:7875201-7875400
chr2:7879801-7880000
chr2:7886401-7886600
chr2:7904401-7904600
chr2:7907401-7907600
chr2:7962001-7962200
chr2:8030601-8030800
chr2:8035601-8035800
chr2:8079401-8079600
chr2:8079601-8079800
chr2:8090201-8090400
chr2:8103401-8103600
chr2:8181201-8181400
chr2:8233401-8233600
chr2:8233601-8233800
chr2:8269601-8269800
chr2:8333401-8333600
chr2:8366601-8366800
chr2:8378601-8378800
chr2:8407401-8407600
chr2:8448801-8449000
chr2:8449001-8449200
chr2:8536601-8536800
chr2:8545801-8546000
chr2:8575201-8575400
chr2:8622601-8622800
chr2:8626601-8626800
chr2:8629801-8630000
chr2:8643801-8644000
chr2:8667001-8667200
chr2:8707801-8708000
chr2:8765401-8765600
chr2:8765601-8765800
chr2:8776801-8777000
chr2:8824601-8824800
chr2:8893401-8893600
chr2:8939401-8939600
chr2:8939601-8939800
chr2:9020201-9020400
chr2:9021801-9022000
chr2:9022001-9022200
chr2:9079801-9080000
chr2:9169601-9169800
chr2:9169801-9170000
chr2:9183201-9183400
chr2:9234601-9234800
chr2:9323401-9323600
chr2:9339201-9339400
chr2:9339401-9339600
chr2:9379001-9379200
chr2:9382401-9382600
chr2:9432001-9432200
chr2:9432201-9432400
chr2:9445601-9445800
chr2:9446401-9446600
chr2:9446601-9446800
chr2:9481401-9481600
chr2:9481601-9481800
chr2:9484401-9484600
chr2:9484801-9485000
chr2:9486201-9486400
chr2:9550401-9550600
chr2:9550601-9550800
chr2:9567001-9567200
chr2:9592201-9592400
chr2:9683201-9683400
chr2:9703001-9703200
chr2:9713201-9713400
chr2:9713401-9713600
chr2:9783401-9783600
chr2:9850401-9850600
chr2:9852801-9853000
chr2:9853801-9854000
chr2:9885201-9885400
chr2:9885401-9885600
chr2:9887201-9887400
chr2:9887401-9887600
chr2:9947401-9947600
chr2:9965401-9965600
chr2:9975801-9976000
chr2:9987601-9987800
chr2:10114001-10114200
chr2:10133601-10133800
chr2:10160401-10160600
chr2:10181201-10181400
chr2:10181401-10181600
chr2:10198401-10198600
chr2:10198601-10198800
chr2:10278001-10278200
chr2:10278201-10278400
chr2:10279201-10279400
chr2:10289601-10289800
chr2:10353601-10353800
chr2:10360001-10360200
chr2:10412201-10412400
chr2:10442801-10443000
chr2:10512801-10513000
chr2:10516401-10516600
chr2:10535801-10536000
chr2:10553201-10553400
chr2:10553401-10553600
chr2:10554801-10555000
chr2:10579801-10580000
chr2:10589001-10589200
chr2:10612001-10612200
chr2:10651801-10652000
chr2:10661001-10661200
chr2:10708601-10708800
chr2:10709801-10710000
chr2:10729401-10729600
chr2:10729601-10729800
chr2:10730801-10731000
chr2:10732201-10732400
chr2:10732401-10732600
chr2:10739201-10739400
chr2:10739401-10739600
chr2:10748801-10749000
chr2:10837201-10837400
chr2:10909001-10909200
chr2:10944201-10944400
chr2:10952201-10952400
chr2:11010801-11011000
chr2:11052201-11052400
chr2:11056401-11056600
chr2:11056601-11056800
chr2:11076601-11076800
chr2:11077201-11077400
chr2:11107401-11107600
chr2:11107801-11108000
chr2:11183401-11183600
chr2:11298201-11298400
chr2:11298401-11298600
chr2:11315601-11315800
chr2:11315801-11316000
chr2:11346401-11346600
chr2:11346601-11346800
chr2:11361601-11361800
chr2:11361801-11362000
chr2:11367201-11367400
chr2:11386801-11387000
chr2:11387001-11387200
chr2:11400601-11400800
chr2:11409001-11409200
chr2:11409201-11409400
chr2:11461401-11461600
chr2:11495201-11495400
chr2:11495401-11495600
chr2:11502601-11502800
chr2:11508601-11508800
chr2:11508801-11509000
chr2:11544401-11544600
chr2:11544801-11545000
chr2:11559001-11559200
chr2:11559201-11559400
chr2:11618001-11618200
chr2:11619201-11619400
chr2:11645601-11645800
chr2:11645801-11646000
chr2:11646001-11646200
chr2:11649001-11649200
chr2:11649201-11649400
chr2:11649401-11649600
chr2:11663201-11663400
chr2:11694201-11694400
chr2:11760201-11760400
chr2:11952601-11952800
chr2:11953001-11953200
chr2:12106801-12107000
chr2:12136601-12136800
chr2:12150201-12150400
chr2:12150401-12150600
chr2:12151801-12152000
chr2:12174001-12174200
chr2:12174201-12174400
chr2:12175201-12175400
chr2:12175401-12175600
chr2:12202401-12202600
chr2:12244001-12244200
chr2:12256001-12256200
chr2:12377801-12378000
chr2:12393201-12393400
chr2:12410001-12410200
chr2:12475601-12475800
chr2:12475801-12476000
chr2:12477201-12477400
chr2:12622801-12623000
chr2:12733201-12733400
chr2:12780601-12780800
chr2:12858201-12858400
chr2:12877401-12877600
chr2:12930201-12930400
chr2:12985601-12985800
chr2:12985801-12986000
chr2:13032401-13032600
chr2:13066001-13066200
chr2:13107201-13107400
chr2:13127201-13127400
chr2:13160201-13160400
chr2:13160801-13161000
chr2:13312601-13312800
chr2:13338401-13338600
chr2:13514201-13514400
chr2:13541001-13541200
chr2:13579001-13579200
chr2:13675801-13676000
chr2:13717201-13717400
chr2:13717401-13717600
chr2:13879401-13879600
chr2:13904401-13904600
chr2:13984201-13984400
chr2:14009401-14009600
chr2:14145001-14145200
chr2:14145201-14145400
chr2:14190601-14190800
chr2:14190801-14191000
chr2:14386601-14386800
chr2:14386801-14387000
chr2:14387001-14387200
chr2:14393001-14393200
chr2:14555601-14555800
chr2:14637601-14637800
chr2:14701801-14702000
chr2:14722201-14722400
chr2:14841001-14841200
chr2:14887601-14887800
chr2:14920801-14921000
chr2:15448601-15448800
chr2:15478601-15478800
chr2:15598801-15599000
chr2:15791001-15791200
chr2:15791201-15791400
chr2:15791401-15791600
chr2:15845201-15845400
chr2:15851001-15851200
chr2:15885001-15885200
chr2:16030401-16030600
chr2:16082601-16082800
chr2:16117001-16117200
chr2:16272601-16272800
chr2:16333801-16334000
chr2:16364001-16364200
chr2:16370601-16370800
chr2:16588001-16588200
chr2:16714001-16714200
chr2:16742201-16742400
chr2:16742401-16742600
chr2:16834401-16834600
chr2:16952601-16952800
chr2:16953201-16953400
chr2:16972601-16972800
chr2:16973601-16973800
chr2:17009201-17009400
chr2:17190201-17190400
chr2:17277801-17278000
chr2:17363601-17363800
chr2:17788401-17788600
chr2:17788601-17788800
chr2:18353801-18354000
chr2:18355801-18356000
chr2:18391001-18391200
chr2:18528001-18528200
chr2:18528201-18528400
chr2:18655601-18655800
chr2:18655801-18656000
chr2:18676801-18677000
chr2:18797401-18797600
chr2:18797601-18797800
chr2:18803801-18804000
chr2:18845801-18846000
chr2:18971801-18972000
chr2:19071601-19071800
chr2:19071801-19072000
chr2:19143601-19143800
chr2:19143801-19144000
chr2:19214201-19214400
chr2:19220001-19220200
chr2:19374001-19374200
chr2:19683401-19683600
chr3:451601-451800
chr3:558001-558200
chr3:810201-810400
chr3:848601-848800
chr3:848801-849000
chr3:1122001-1122200
chr3:1129601-1129800
chr3:1165801-1166000
chr3:1166001-1166200
chr3:1692601-1692800
chr3:1849001-1849200
chr3:2251201-2251400
chr3:2551801-2552000
chr3:2601201-2601400
chr3:3075401-3075600
chr3:3075601-3075800
chr3:3188601-3188800
chr3:3263601-3263800
chr3:3410201-3410400
chr3:3542401-3542600
chr3:3631001-3631200
chr3:3664201-3664400
chr3:3664401-3664600
chr3:3687401-3687600
chr3:3755201-3755400
chr3:3807001-3807200
chr3:3987601-3987800
chr3:4359001-4359200
chr3:4866601-4866800
chr3:5152001-5152200
chr3:5377801-5378000
chr3:5381401-5381600
chr3:5453001-5453200
chr3:5508801-5509000
chr3:5529001-5529200
chr3:5591401-5591600
chr3:5629201-5629400
chr3:5643401-5643600
chr3:5729801-5730000
chr3:5779601-5779800
chr3:5835401-5835600
chr3:5867201-5867400
chr3:5867401-5867600
chr3:5867601-5867800
chr3:5867801-5868000
chr3:5931201-5931400
chr3:5955201-5955400
chr3:5987201-5987400
chr3:6011401-6011600
chr3:6172801-6173000
chr3:6269001-6269200
chr3:6291601-6291800
chr3:6577201-6577400
chr3:6624401-6624600
chr3:6668401-6668600
chr3:6731001-6731200
chr3:6793601-6793800
chr3:6912401-6912600
chr3:6988601-6988800
chr3:7194001-7194200
chr3:7214401-7214600
chr3:7232401-7232600
chr3:7232601-7232800
chr3:7238201-7238400
chr3:7238401-7238600
chr3:7253401-7253600
chr3:7288201-7288400
chr3:7288401-7288600
chr3:7317401-7317600
chr3:7331001-7331200
chr3:7331201-7331400
chr3:7355201-7355400
chr3:7355401-7355600
chr3:7398201-7398400
chr3:7502401-7502600
chr3:7556801-7557000
chr3:7566001-7566200
chr3:7566401-7566600
chr3:7637201-7637400
chr3:7704001-7704200
chr3:7782201-7782400
chr3:7834601-7834800
chr3:7847801-7848000
chr3:7857801-7858000
chr3:7880801-7881000
chr3:7901801-7902000
chr3:7903401-7903600
chr3:7920801-7921000
chr3:7938201-7938400
chr3:7938401-7938600
chr3:8032201-8032400
chr3:8048401-8048600
chr3:8122401-8122600
chr3:8133201-8133400
chr3:8138601-8138800
chr3:8302001-8302200
chr3:8332001-8332200
chr3:8356801-8357000
chr3:8357001-8357200
chr3:8371801-8372000
chr3:8372001-8372200
chr3:8408801-8409000
chr3:8414801-8415000
chr3:8426801-8427000
chr3:8427001-8427200
chr3:8484201-8484400
chr3:8493601-8493800
chr3:8497001-8497200
chr3:8547801-8548000
chr3:8564801-8565000
chr3:8565001-8565200
chr3:8574401-8574600
chr3:8574601-8574800
chr3:8654601-8654800
chr3:8660001-8660200
chr3:8684201-8684400
chr3:8690201-8690400
chr3:8690401-8690600
chr3:8714801-8715000
chr3:8715001-8715200
chr3:8758801-8759000
chr3:8820001-8820200
chr3:8836201-8836400
chr3:8894801-8895000
chr3:8895001-8895200
chr3:8949201-8949400
chr3:8949401-8949600
chr3:9120401-9120600
chr3:9120601-9120800
chr3:9130601-9130800
chr3:9134401-9134600
chr3:9148801-9149000
chr3:9149001-9149200
chr3:9153801-9154000
chr3:9197601-9197800
chr3:9226801-9227000
chr3:9232401-9232600
chr3:9232601-9232800
chr3:9300201-9300400
chr3:9300401-9300600
chr3:9326001-9326200
chr3:9327601-9327800
chr3:9327801-9328000
chr3:9382601-9382800
chr3:9459201-9459400
chr3:9563801-9564000
chr3:9564001-9564200
chr3:9576001-9576200
chr3:9630201-9630400
chr3:9643601-9643800
chr3:9643801-9644000
chr3:9644001-9644200
chr3:9646601-9646800
chr3:9649001-9649200
chr3:9649601-9649800
chr3:9681401-9681600
chr3:9699201-9699400
chr3:9719201-9719400
chr3:9719401-9719600
chr3:9769001-9769200
chr3:9773801-9774000
chr3:9862601-9862800
chr3:9874401-9874600
chr3:9901601-9901800
chr3:9903201-9903400
chr3:10021201-10021400
chr3:10021401-10021600
chr3:10030201-10030400
chr3:10038601-10038800
chr3:10075001-10075200
chr3:10111801-10112000
chr3:10112001-10112200
chr3:10113601-10113800
chr3:10114201-10114400
chr3:10114401-10114600
chr3:10116001-10116200
chr3:10146801-10147000
chr3:10172001-10172200
chr3:10190601-10190800
chr3:10204201-10204400
chr3:10220201-10220400
chr3:10253801-10254000
chr3:10254801-10255000
chr3:10345801-10346000
chr3:10375201-10375400
chr3:10393601-10393800
chr3:10403001-10403200
chr3:10423601-10423800
chr3:10423801-10424000
chr3:10440401-10440600
chr3:10449601-10449800
chr3:10454001-10454200
chr3:10493201-10493400
chr3:10511401-10511600
chr3:10535201-10535400
chr3:10593201-10593400
chr3:10593401-10593600
chr3:10599201-10599400
chr3:10599401-10599600
chr3:10604801-10605000
chr3:10605001-10605200
chr3:10605401-10605600
chr3:10628401-10628600
chr3:10628601-10628800
chr3:10635201-10635400
chr3:10645801-10646000
chr3:10652201-10652400
chr3:10666401-10666600
chr3:10684801-10685000
chr3:10690201-10690400
chr3:10704601-10704800
chr3:10704801-10705000
chr3:10713601-10713800
chr3:10713801-10714000
chr3:10714001-10714200
chr3:10743001-10743200
chr3:10743201-10743400
chr3:10753201-10753400
chr3:10781601-10781800
chr3:10804401-10804600
chr3:10834401-10834600
chr3:10834601-10834800
chr3:10843201-10843400
chr3:10847601-10847800
chr3:10850201-10850400
chr3:10861601-10861800
chr3:10866201-10866400
chr3:10883001-10883200
chr3:10899201-10899400
chr3:10929601-10929800
chr3:10934201-10934400
chr3:10947001-10947200
chr3:10950401-10950600
chr3:10954401-10954600
chr3:10961001-10961200
chr3:10961601-10961800
chr3:10978201-10978400
chr3:11031401-11031600
chr3:11044201-11044400
chr3:11049601-11049800
chr3:11080201-11080400
chr3:11082801-11083000
chr3:11088801-11089000
chr3:11095801-11096000
chr3:11120601-11120800
chr3:11140801-11141000
chr3:11168201-11168400
chr3:11248201-11248400
chr3:11270401-11270600
chr3:11272601-11272800
chr3:11276201-11276400
chr3:11279401-11279600
chr3:11283801-11284000
chr3:11288201-11288400
chr3:11288401-11288600
chr3:11345601-11345800
chr3:11534601-11534800
chr3:11587201-11587400
chr3:11671201-11671400
chr3:11744001-11744200
chr3:11801201-11801400
chr3:11803001-11803200
chr3:11826801-11827000
chr3:11907201-11907400
chr3:11955401-11955600
chr3:11955601-11955800
chr3:11970601-11970800
chr3:11984601-11984800
chr3:11984801-11985000
chr3:11986401-11986600
chr3:11988401-11988600
chr3:11988601-11988800
chr3:11990401-11990600
chr3:11992001-11992200
chr3:11992401-11992600
chr3:11994201-11994400
chr3:12140801-12141000
chr3:12166001-12166200
chr3:12354801-12355000
chr3:12590201-12590400
chr3:13116001-13116200
chr3:14308201-14308400
chr3:14603601-14603800
chr3:14687601-14687800
chr3:14735201-14735400
chr3:14750201-14750400
chr3:14905001-14905200
chr3:15186601-15186800
chr3:15190001-15190200
chr3:15196601-15196800
chr3:15233201-15233400
chr3:15356401-15356600
chr3:15483401-15483600
chr3:15501201-15501400
chr3:15505001-15505200
chr3:15524401-15524600
chr3:15524601-15524800
chr3:15566001-15566200
chr3:15566601-15566800
chr3:15668001-15668200
chr3:15748201-15748400
chr3:15753001-15753200
chr3:15781801-15782000
chr3:15837801-15838000
chr3:15838001-15838200
chr3:15854401-15854600
chr3:15871801-15872000
chr3:15875001-15875200
chr3:15877001-15877200
chr3:15895001-15895200
chr3:15904201-15904400
chr3:15904601-15904800
chr3:15912201-15912400
chr3:15928801-15929000
chr3:15929001-15929200
chr3:15941601-15941800
chr3:15948201-15948400
chr3:15955201-15955400
chr3:15968001-15968200
chr3:16006201-16006400
chr3:16044201-16044400
chr3:16060601-16060800
chr3:16061001-16061200
chr3:16072801-16073000
chr3:16079201-16079400
chr3:16079401-16079600
chr3:16090001-16090200
chr3:16090201-16090400
chr3:16098601-16098800
chr3:16099001-16099200
chr3:16110001-16110200
chr3:16114601-16114800
chr3:16158201-16158400
chr3:16206201-16206400
chr3:16206401-16206600
chr3:16214201-16214400
chr3:16214401-16214600
chr3:16221601-16221800
chr3:16221801-16222000
chr3:16225801-16226000
chr3:16226201-16226400
chr3:16238201-16238400
chr3:16277201-16277400
chr3:16302601-16302800
chr3:16347201-16347400
chr3:16377601-16377800
chr3:16411001-16411200
chr3:16412801-16413000
chr3:16413001-16413200
chr3:16442001-16442200
chr3:16445801-16446000
chr3:16459401-16459600
chr3:16462801-16463000
chr3:16509001-16509200
chr3:16522201-16522400
chr3:16548801-16549000
chr3:16556001-16556200
chr3:16558401-16558600
chr3:16563801-16564000
chr3:16570001-16570200
chr3:16574201-16574400
chr3:16574401-16574600
chr3:16576601-16576800
chr3:16584201-16584400
chr3:16584401-16584600
chr3:16686401-16686600
chr3:16708801-16709000
chr3:16754601-16754800
chr3:16754801-16755000
chr3:16755001-16755200
chr3:16764601-16764800
chr3:16798001-16798200
chr3:16814201-16814400
chr3:16854201-16854400
chr3:16855001-16855200
chr3:16855201-16855400
chr3:16939401-16939600
chr3:16939601-16939800
chr3:16943001-16943200
chr3:16957401-16957600
chr3:16974001-16974200
chr3:16992401-16992600
chr3:16995601-16995800
chr3:16995801-16996000
chr3:17042001-17042200
chr3:17042201-17042400
chr3:17051001-17051200
chr3:17063801-17064000
chr3:17087201-17087400
chr3:17104001-17104200
chr3:17140601-17140800
chr3:17162801-17163000
chr3:17176601-17176800
chr3:17176801-17177000
chr3:17205201-17205400
chr3:17205801-17206000
chr3:17249601-17249800
chr3:17332401-17332600
chr3:17353401-17353600
chr3:17372401-17372600
chr3:17448401-17448600
chr3:17546401-17546600
chr3:17579601-17579800
chr3:17580201-17580400
chr3:17623001-17623200
chr3:17662001-17662200
chr3:17683801-17684000
chr3:17881401-17881600
chr3:17881601-17881800
chr3:17899201-17899400
chr3:17970001-17970200
chr3:17970201-17970400
chr3:18062201-18062400
chr3:18192801-18193000
chr3:18193001-18193200
chr3:18255001-18255200
chr3:18255401-18255600
chr3:18339601-18339800
chr3:18459201-18459400
chr3:18488401-18488600
chr3:18488601-18488800
chr3:18503201-18503400
chr3:18545401-18545600
chr3:18585201-18585400
chr3:18611601-18611800
chr3:18611801-18612000
chr3:18612001-18612200
chr3:18617001-18617200
chr3:18629601-18629800
chr3:18645601-18645800
chr3:18672001-18672200
chr3:18672201-18672400
chr3:18721201-18721400
chr3:18727001-18727200
chr3:18830801-18831000
chr3:18831801-18832000
chr3:18860001-18860200
chr3:18884201-18884400
chr3:18925201-18925400
chr3:19142801-19143000
chr3:19291201-19291400
chr3:19392201-19392400
chr3:19420601-19420800
chr3:19472001-19472200
chr3:19568201-19568400
chr3:19701001-19701200
chr3:19766201-19766400
chr3:20024601-20024800
chr3:20056001-20056200
chr3:20090201-20090400
chr3:20234801-20235000
chr3:20362401-20362600
chr3:20481001-20481200
chr3:20539401-20539600
chr3:20539601-20539800
chr3:20584401-20584600
chr3:20652201-20652400
chr3:20873001-20873200
chr3:20955401-20955600
chr3:20957201-20957400
chr3:20999001-20999200
chr3:21267201-21267400
chr3:21267401-21267600
chr3:21267601-21267800
chr3:21277201-21277400
chr3:21277401-21277600
chr3:21282801-21283000
chr3:21363601-21363800
chr3:21363801-21364000
chr3:21457201-21457400
chr3:21502401-21502600
chr3:21553401-21553600
chr3:21601401-21601600
chr3:21601601-21601800
chr3:21601801-21602000
chr3:22204001-22204200
chr3:22218801-22219000
chr3:22465201-22465400
chr3:22533401-22533600
chr3:22533601-22533800
chr3:22954601-22954800
chr3:23067801-23068000
chr3:23130801-23131000
chr3:23156801-23157000
chr4:30601-30800
chr4:44001-44200
chr4:67401-67600
chr4:68601-68800
chr4:68801-69000
chr4:120001-120200
chr4:158001-158200
chr4:173601-173800
chr4:177201-177400
chr4:379201-379400
chr4:410001-410200
chr4:425201-425400
chr4:474401-474600
chr4:486201-486400
chr4:554001-554200
chr4:555401-555600
chr4:566801-567000
chr4:583401-583600
chr4:590001-590200
chr4:590201-590400
chr4:590401-590600
chr4:604401-604600
chr4:636601-636800
chr4:645801-646000
chr4:650201-650400
chr4:653401-653600
chr4:653601-653800
chr4:712801-713000
chr4:725601-725800
chr4:743401-743600
chr4:835801-836000
chr4:860801-861000
chr4:876001-876200
chr4:954201-954400
chr4:966201-966400
chr4:966401-966600
chr4:1014401-1014600
chr4:1063601-1063800
chr4:1089001-1089200
chr4:1236601-1236800
chr4:1356201-1356400
chr4:1356401-1356600
chr4:1380001-1380200
chr4:1397801-1398000
chr4:1506801-1507000
chr4:1586201-1586400
chr4:1783001-1783200
chr4:2118801-2119000
chr4:2120801-2121000
chr4:2136401-2136600
chr4:2176201-2176400
chr4:2218601-2218800
chr4:2218801-2219000
chr4:2277801-2278000
chr4:2332801-2333000
chr4:2335801-2336000
chr4:2337201-2337400
chr4:2384201-2384400
chr4:2388601-2388800
chr4:2393801-2394000
chr4:2400801-2401000
chr4:2415801-2416000
chr4:2416001-2416200
chr4:2416201-2416400
chr4:2416601-2416800
chr4:2420201-2420400
chr4:2425201-2425400
chr4:2433801-2434000
chr4:2467401-2467600
chr4:2471401-2471600
chr4:2527001-2527200
chr4:2535801-2536000
chr4:2536001-2536200
chr4:2547601-2547800
chr4:2557601-2557800
chr4:2557801-2558000
chr4:2566001-2566200
chr4:2566201-2566400
chr4:2570601-2570800
chr4:2594801-2595000
chr4:2608001-2608200
chr4:2614401-2614600
chr4:2626001-2626200
chr4:2630401-2630600
chr4:2667201-2667400
chr4:2667401-2667600
chr4:2686001-2686200
chr4:2686401-2686600
chr4:2689601-2689800
chr4:2690401-2690600
chr4:2690601-2690800
chr4:2724001-2724200
chr4:2755601-2755800
chr4:2770001-2770200
chr4:2775001-2775200
chr4:2804001-2804200
chr4:2965401-2965600
chr4:2989601-2989800
chr4:3894001-3894200
chr4:4801401-4801600
chr4:4866201-4866400
chr4:4884801-4885000
chr4:5037401-5037600
chr4:5087201-5087400
chr4:5087801-5088000
chr4:5112001-5112200
chr4:5118601-5118800
chr4:5123201-5123400
chr4:5139201-5139400
chr4:5158801-5159000
chr4:5159001-5159200
chr4:5167401-5167600
chr4:5168601-5168800
chr4:5182801-5183000
chr4:5191601-5191800
chr4:5238001-5238200
chr4:5238201-5238400
chr4:5277001-5277200
chr4:5298601-5298800
chr4:5314601-5314800
chr4:5317601-5317800
chr4:5317801-5318000
chr4:5374201-5374400
chr4:5374401-5374600
chr4:5395601-5395800
chr4:5421401-5421600
chr4:5441601-5441800
chr4:5454401-5454600
chr4:5581201-5581400
chr4:5602801-5603000
chr4:5603001-5603200
chr4:5650201-5650400
chr4:5677601-5677800
chr4:5698801-5699000
chr4:5717401-5717600
chr4:5732401-5732600
chr4:5733001-5733200
chr4:5738201-5738400
chr4:5751201-5751400
chr4:5761201-5761400
chr4:5789001-5789200
chr4:5790001-5790200
chr4:5801601-5801800
chr4:5837401-5837600
chr4:5839001-5839200
chr4:5858801-5859000
chr4:5859001-5859200
chr4:5876201-5876400
chr4:5902401-5902600
chr4:5929601-5929800
chr4:5984001-5984200
chr4:6002201-6002400
chr4:6006801-6007000
chr4:6009601-6009800
chr4:6009801-6010000
chr4:6014601-6014800
chr4:6016201-6016400
chr4:6017001-6017200
chr4:6020601-6020800
chr4:6030201-6030400
chr4:6045401-6045600
chr4:6067201-6067400
chr4:6076401-6076600
chr4:6076601-6076800
chr4:6103001-6103200
chr4:6116001-6116200
chr4:6123801-6124000
chr4:6141801-6142000
chr4:6170601-6170800
chr4:6177801-6178000
chr4:6180201-6180400
chr4:6184001-6184200
chr4:6192401-6192600
chr4:6207601-6207800
chr4:6216601-6216800
chr4:6238801-6239000
chr4:6253201-6253400
chr4:6282401-6282600
chr4:6303001-6303200
chr4:6303201-6303400
chr4:6312601-6312800
chr4:6321801-6322000
chr4:6326401-6326600
chr4:6342801-6343000
chr4:6343001-6343200
chr4:6351401-6351600
chr4:6387001-6387200
chr4:6387601-6387800
chr4:6474201-6474400
chr4:6487201-6487400
chr4:6487401-6487600
chr4:6487601-6487800
chr4:6552601-6552800
chr4:6553401-6553600
chr4:6563201-6563400
chr4:6576601-6576800
chr4:6576801-6577000
chr4:6596601-6596800
chr4:6623601-6623800
chr4:6647201-6647400
chr4:6647401-6647600
chr4:6689801-6690000
chr4:6735201-6735400
chr4:6748601-6748800
chr4:6748801-6749000
chr4:6759401-6759600
chr4:6759601-6759800
chr4:6766801-6767000
chr4:6812601-6812800
chr4:6812801-6813000
chr4:6831601-6831800
chr4:6831801-6832000
chr4:6860401-6860600
chr4:6860801-6861000
chr4:6861401-6861600
chr4:6886001-6886200
chr4:6943001-6943200
chr4:6955001-6955200
chr4:6977601-6977800
chr4:6977801-6978000
chr4:6978201-6978400
chr4:6985001-6985200
chr4:7089601-7089800
chr4:7101201-7101400
chr4:7102601-7102800
chr4:7115201-7115400
chr4:7164401-7164600
chr4:7164601-7164800
chr4:7169801-7170000
chr4:7179201-7179400
chr4:7210001-7210200
chr4:7210201-7210400
chr4:7243801-7244000
chr4:7244801-7245000
chr4:7267201-7267400
chr4:7267401-7267600
chr4:7267601-7267800
chr4:7300401-7300600
chr4:7318401-7318600
chr4:7318601-7318800
chr4:7330401-7330600
chr4:7420601-7420800
[truncated: 808 more rows]
