# Supplementary material for: A novel histone H3K4me1-specific binding protein is required for siRNA accumulation and DNA methylation at a subset of loci targeted by RNA-directed DNA methylation
Source: Research Square preprint supplement (doi:10.21203/rs.3.rs-98860/v1), 2020-11-04
Supplement: Supplementary file 3 [file c5bdc7cc359bb33d518c2b6c.xlsx]

## Sheet: Table S3
Checked	Protein FDR Confidence: Combined	Master	Accession	Description	Exp. q-value: Combined	Sum PEP Score	Coverage [%]	# Peptides	# PSMs	# Unique Peptides	# Protein Groups	# AAs	MW [kDa]	calc. pI	Score Sequest HT: Sequest HT	# Peptides (by Search Engine): Sequest HT	# Razor Peptides	Found in Sample: [S1] F1: Sample_col0 Flag	Found in Sample: [S2] F2: Sample_col0 Myc	Found in Sample: [S3] F3: Sample_RDM15 Flag	Found in Sample: [S4] F4: Sample_RDM15 Flag	Found in Sample: [S5] F5: Sample_RDM5 Myc	Found in Sample: [S6] F6: Sample_RDM5 Myc	Modifications
FALSE	High	Master Protein	AT4G31880.1	LOCATED IN: cytosol, chloroplast; EXPRESSED IN: 24 plant structures; EXPRESSED DURING: 14 growth stages; BEST Arabidopsis thaliana protein match is: Tudor/PWWP/MBT superfamily protein (TAIR:AT1G15940.1); Has 137162 Blast hits to 70781 proteins in 2973 species: Archae - 289; Bacteria - 24182; Metazoa - 56725; Fungi - 20130; Plants - 6559; Viruses - 758; Other Eukaryotes - 28519 (source: NCBI BLink…	0	137.13	44	92	98	92	1	873	94.2	5.66	140.28	33	0	Not Found	Not Found	High	High	High	High
FALSE	High	Master Protein	AT3G44310.3	nitrilase 1	0	91.73	51	16	53	16	1	346	38.1	6.28	119.11	16	0	High	Peak Found	High	High	Peak Found	Peak Found
FALSE	High	Master Protein	AT1G07820.2	Histone superfamily protein	0	37.984	53	8	40	8	1	103	11.4	11.47	64.38	8	0	Peak Found	Peak Found	High	High	High	High
FALSE	High	Master Protein	AT5G22880.1	histone B2	0	26.128	26	3	17	2	1	145	15.7	10.05	43.89	3	3	Peak Found	Peak Found	High	High	High	High
FALSE	High	Master Protein	AT5G26742.2	DEAD box RNA helicase (RH3)	0	14.55	11	7	8	7	1	748	81.1	7.8	11.22	7	0	Peak Found	Peak Found	High	High	Peak Found	Peak Found
FALSE	High	Master Protein	AT2G37470.1	Histone superfamily protein	0	14.059	19	2	8	1	1	138	15.1	10.05	14.82	2	0	Not Found	Not Found	High	High	High	High
FALSE	High	Master Protein	AT1G10290.1	dynamin-like protein 6	0	11.225	10	7	7	2	1	914	99.1	9.04	5.58	7	0	Not Found	Not Found	High	High	High	High	Acetyl [N-Term]
FALSE	High	Master Protein	AT1G52740.1	histone H2A protein 9	0	10.843	34	4	11	3	1	134	14.3	10.29	20.68	4	1	Not Found	Peak Found	High	High	High	High
FALSE	High	Master Protein	AT1G59610.1	dynamin-like 3	0	9.882	9	7	7	2	1	920	100.2	9.04	5.41	7	5	Peak Found	Peak Found	High	High	Peak Found	Peak Found
FALSE	High	Master Protein	AT5G27670.1	histone H2A 7	0	8.845	19	3	7	2	1	150	15.9	10.46	14.78	3	0	Not Found	Not Found	High	High	High	High	Acetyl [N-Term]
FALSE	High	Master Protein	AT5G42080.1	dynamin-like protein	0	8.273	11	5	5	5	1	610	68.1	8.31	2.43	5	0	Not Found	Not Found	High	High	High	High	Acetyl [N-Term]
FALSE	High	Master Protein	ATCG00480.1	ATP synthase subunit beta	0	6.837	9	4	5	4	1	498	53.9	5.5	3.86	4	0	Peak Found	Peak Found	High	High	High	High
FALSE	High	Master Protein	AT5G07090.1	Ribosomal protein S4 (RPS4A) family protein	0	5.5	15	4	5	4	1	262	29.9	10.17	8.06	4	0	Peak Found	Not Found	High	High	High	High
FALSE	High	Master Protein	AT4G00430.1	plasma membrane intrinsic protein 1;4	0	5.427	14	4	4	2	1	287	30.7	8.84	2.04	4	2	High	Peak Found	Peak Found	Peak Found	Peak Found	Peak Found	Acetyl [N-Term]
FALSE	High	Master Protein	ATCG00490.1	ribulose-bisphosphate carboxylases	0	5.049	7	3	7	3	1	479	52.9	6.29	3.71	3	0	High	High	High	High	High	High
FALSE	High	Master Protein	AT2G45960.3	plasma membrane intrinsic protein 1B	0	4.935	17	4	4	2	1	301	32.4	8.51	0	4	0	High	Peak Found	Peak Found	Peak Found	Not Found	Not Found	Acetyl [N-Term]
FALSE	High	Master Protein	AT1G12900.1	glyceraldehyde 3-phosphate dehydrogenase A subunit 2	0	4.909	10	3	3	3	1	399	42.8	8.05	2.76	3	0	Peak Found	Not Found	High	High	Peak Found	Peak Found
FALSE	High	Master Protein	AT1G08880.1	Histone superfamily protein	0	4.871	11	2	6	1	1	142	14.8	10.32	13.47	2	0	Not Found	Not Found	High	High	High	High
FALSE	High	Master Protein	AT5G65350.1	histone 3 11	0	4.794	16	9	12	9	1	139	15.6	11.25	9.54	3	0	Peak Found	Peak Found	High	High	High	High
FALSE	High	Master Protein	AT4G30190.2	H(+)-ATPase 2	0	4.695	4	3	4	3	1	981	108.2	7.14	1.97	3	0	High	Peak Found	Peak Found	Peak Found	Not Found	Not Found
FALSE	High	Master Protein	AT4G35100.1	plasma membrane intrinsic protein 3	0	4.52	6	1	1	1	1	280	29.7	8.81	2.16	1	0	High	Not Found	Peak Found	Peak Found	Not Found	Not Found
FALSE	High	Master Protein	AT4G40030.2	Histone superfamily protein	0	4.213	13	3	6	1	1	164	18.7	11.14	11.54	3	2	Not Found	Not Found	High	High	High	High
FALSE	High	Master Protein	ATCG00120.1	ATP synthase subunit alpha	0	3.996	4	2	2	2	1	507	55.3	5.25	2.17	2	0	Peak Found	Peak Found	High	High	Peak Found	Peak Found
FALSE	High	Master Protein	AT2G15400.1	DNA-directed RNA polymerase family protein	0	3.946	12	7	8	7	1	319	35.6	4.91	1.26	1	0	Not Found	Not Found	High	High	High	High
FALSE	High	Master Protein	AT5G59870.1	histone H2A 6	0	3.651	11	2	4	1	1	150	16	10.55	9.03	2	0	Not Found	Not Found	High	High	Peak Found	Peak Found
FALSE	High	Master Protein	AT4G15000.1	Ribosomal L27e protein family	0	3.501	14	2	2	2	1	135	15.6	10.26	3.79	2	0	Peak Found	Peak Found	High	High	Peak Found	Peak Found
FALSE	High	Master Protein	AT5G37640.1	ubiquitin 9	0	3.22	12	2	3	2	1	322	36.2	6.2	1.86	2	0	Peak Found	Peak Found	High	High	Peak Found	Peak Found
FALSE	High	Master Protein	AT1G14320.1	Ribosomal protein L16p/L10e family protein	0	3.077	10	2	2	2	1	220	24.9	10.49	2.19	2	0	Not Found	Not Found	High	High	High	High
FALSE	High	Master Protein	AT4G31700.1	ribosomal protein S6	0	3.056	11	2	2	2	1	250	28.4	10.61	2.17	2	0	Not Found	Not Found	High	High	Peak Found	Peak Found
FALSE	High	Master Protein	AT5G06850.1	C2 calcium/lipid-binding plant phosphoribosyltransferase family protein	0	2.895	3	2	2	2	1	794	90.9	9.04	0	2	0	High	Not Found	Peak Found	Peak Found	Peak Found	Peak Found
FALSE	High	Master Protein	AT2G18020.1	Ribosomal protein L2 family	0	2.886	7	1	1	1	1	258	27.8	10.9	2.13	1	0	Not Found	Peak Found	High	High	Peak Found	Peak Found
FALSE	High	Master Protein	AT3G16410.1	nitrile specifier protein 4	0	2.581	4	2	2	2	1	619	67.6	5.15	0	2	0	Not Found	High	Not Found	Peak Found	Not Found	Not Found
FALSE	High	Master Protein	AT4G27500.1	proton pump interactor 1	0	2.352	2	1	1	1	1	612	68.8	9.03	0	1	0	Not Found	Not Found	High	High	Peak Found	Peak Found
FALSE	High	Master Protein	AT1G78850.1	D-mannose binding lectin protein with Apple-like carbohydrate-binding domain	0	2.336	4	2	2	2	1	441	49	7.65	0	2	0	Peak Found	High	Peak Found	Peak Found	Peak Found	Peak Found
FALSE	High	Master Protein	AT4G25210.1	DNA-binding storekeeper protein-related transcriptional regulator	0	2.185	3	1	1	1	1	368	40.3	6.29	1.89	1	0	Not Found	Not Found	High	High	Not Found	Not Found
FALSE	High	Master Protein	AT5G02490.1	Heat shock protein 70 (Hsp 70) family protein	0	2.016	2	1	1	1	1	653	71.3	5.12	0	1	0	Peak Found	Peak Found	High	High	High	High
FALSE	High	Master Protein	AT3G09480.1	Histone superfamily protein	0	1.937	12	1	1	1	1	126	14	10.07	1.6	1	0	Not Found	Not Found	High	High	Peak Found	Peak Found
FALSE	High	Master Protein	AT5G02870.1	Ribosomal protein L4/L1 family	0	1.883	6	2	2	2	1	407	44.7	10.3	1.85	2	0	Peak Found	Peak Found	High	High	Peak Found	Peak Found
FALSE	High	Master Protein	AT2G45640.1	SIN3 associated polypeptide P18	0	1.829	7	1	2	1	1	152	17.2	9.17	0	1	0	Not Found	Not Found	High	High	High	High
FALSE	High	Master Protein	AT5G60660.1	plasma membrane intrinsic protein 2;4	0	1.686	3	1	1	1	1	291	30.9	8.06	2	1	0	High	Peak Found	Not Found	Hight	Not Found	Not Found
FALSE	High	Master Protein	AT3G18610.1	nucleolin like 2	0	1.594	1	1	2	1	1	636	68.9	5.12	0	1	0	Not Found	Not Found	High	High	High	High
FALSE	High	Master Protein	AT3G48930.1	Nucleic acid-binding, OB-fold-like protein	0	1.529	7	1	1	1	1	160	17.9	10.56	0	1	0	Not Found	Peak Found	High	High	Peak Found	Peak Found
FALSE	High	Master Protein	AT2G36160.1	Ribosomal protein S11 family protein	0	1.501	7	1	1	1	1	150	16.2	10.59	1.77	1	0	Peak Found	Peak Found	High	High	High	High
FALSE	High	Master Protein	AT4G20360.1	RAB GTPase homolog E1B	0	1.428	3	1	1	1	1	476	51.6	6.19	0	1	0	High	Not Found	Not Found	Not Found	Not Found	Not Found
FALSE	High	Master Protein	AT2G41840.1	Ribosomal protein S5 family protein	0	1.415	5	1	1	1	1	285	30.9	10.29	2.07	1	0	Not Found	Peak Found	High	High	Peak Found	Peak Found
FALSE	High	Master Protein	AT3G05590.1	ribosomal protein L18	0	1.396	7	1	1	1	1	187	20.9	10.98	0	1	0	Not Found	Not Found	High	High	Peak Found	Peak Found
FALSE	High	Master Protein	AT3G49910.1	Translation protein SH3-like family protein	0	1.382	8	1	1	1	1	146	16.9	10.78	0	1	0	Not Found	Not Found	High	High	High	High
FALSE	High	Master Protein	AT4G04640.1	ATPase, F1 complex, gamma subunit protein	0.007	1.338	3	1	1	1	1	373	40.9	8	1.68	1	0	Peak Found	Not Found	High	High	Peak Found	Peak Found
FALSE	High	Master Protein	AT2G36620.1	ribosomal protein L24	0.007	1.332	7	1	1	1	1	164	18.8	10.7	0	1	0	Not Found	Peak Found	High	High	Peak Found	Peak Found
FALSE	High	Master Protein	AT3G52930.1	Aldolase superfamily protein	0.007	1.318	3	1	1	1	1	358	38.5	6.46	0	1	0	Not Found	High	Not Found	Not Found	Not Found	Not Found
FALSE	High	Master Protein	AT5G49750.1	Leucine-rich repeat (LRR) family protein	0.007	1.309	5	1	2	1	1	493	54.7	8.21	2.29	1	0	Peak Found	High	High	High	Peak Found	Peak Found
FALSE	High	Master Protein	AT4G25630.1	fibrillarin 2	0.007	1.278	3	1	1	1	1	320	33.6	10.08	0	1	0	Not Found	Not Found	High	High	High	High
FALSE	High	Master Protein	AT5G37720.1	ALWAYS EARLY 4	0.007	1.184	5	1	1	1	1	288	30.4	11.59	0	1	0	Not Found	Not Found	High	High	Not Found	Not Found
FALSE	High	Master Protein	AT2G47730.1	glutathione S-transferase phi 8	0.007	1.181	3	1	1	1	1	263	29.2	8.5	0	1	0	Not Found	High	Peak Found	Peak Found	Not Found	Not Found
FALSE	High	Master Protein	AT1G27400.1	Ribosomal protein L22p/L17e family protein	0.007	1.15	6	1	1	1	1	176	19.9	10.11	0	1	0	Peak Found	Peak Found	High	High	Peak Found	Hight
FALSE	High	Master Protein	AT4G23670.1	Polyketide cyclase/dehydrase and lipid transport superfamily protein	0.007	1.095	6	1	1	1	1	151	17.5	6.37	0	1	0	Not Found	High	Peak Found	Peak Found	Peak Found	Peak Found
FALSE	High	Master Protein	AT5G14800.1	pyrroline-5- carboxylate (P5C) reductase	0.006	1.084	4	1	1	1	1	276	28.6	8.09	0	1	0	Not Found	Not Found	High	High	Peak Found	Peak Found
FALSE	High	Master Protein	AT3G26520.1	tonoplast intrinsic protein 2	0.006	1.058	7	1	1	1	1	253	25.8	5.06	0	1	0	Not Found	High	Peak Found	Peak Found	Not Found	Not Found
FALSE	High	Master Protein	AT5G13490.1	ADP/ATP carrier 2	0.006	1.027	2	1	2	1	1	385	41.7	9.79	0	1	0	Peak Found	High	High	High	Peak Found	Peak Found
FALSE	High	Master Protein	AT3G53740.4	Ribosomal protein L36e family protein	0.006	1.025	9	1	1	1	1	112	12.7	11.75	1.71	1	0	Peak Found	Peak Found	High	High	Peak Found	Peak Found
FALSE	High	Master Protein	AT3G07110.2	Ribosomal protein L13 family protein	0.006	0.999	6	1	1	1	1	207	23.6	10.4	0	1	0	Not Found	Not Found	High	High	High	High
FALSE	High	Master Protein	AT1G78340.1	glutathione S-transferase TAU 22	0.006	0.995	6	1	1	1	1	218	25.3	5.27	0	1	0	Peak Found	High	Peak Found	Peak Found	Peak Found	Peak Found
FALSE	High	Master Protein	AT5G23060.1	calcium sensing receptor	0.006	0.972	3	1	1	1	1	387	41.3	9.39	0	1	0	Peak Found	Not Found	High	High	Peak Found	Peak Found
FALSE	High	Master Protein	AT3G16460.2	Mannose-binding lectin superfamily protein	0.006	0.941	2	1	1	1	1	705	72.4	5.5	0	1	0	Not Found	High	Not Found	Not Found	Not Found	Not Found
FALSE	High	Master Protein	AT2G20450.1	Ribosomal protein L14	0.006	0.886	7	1	1	1	1	134	15.5	10.13	0	1	0	Not Found	Not Found	High	High	High	High
FALSE	High	Master Protein	AT1G26880.1	Ribosomal protein L34e superfamily protein	0.006	0.879	10	1	1	1	1	120	13.7	11.59	0	1	0	Peak Found	Peak Found	Not Found	High	Peak Found	Peak Found
FALSE	High	Master Protein	AT1G20220.1	Alba DNA/RNA-binding protein	0.006	0.87	3	1	1	1	1	315	33.7	9.92	0	1	0	Not Found	Not Found	High	High	Peak Found	Peak Found
FALSE	High	Master Protein	AT4G35800.1	RNA polymerase II large subunit	0.005	0.863	0	1	1	1	1	1839	204.5	6.04	0	1	0	Peak Found	Not Found	Not Found	High	Not Found	Not Found
FALSE	High	Master Protein	AT1G34070.1	CONTAINS InterPro DOMAIN/s: Retrotransposon gag protein (InterPro:IPR005162); BEST Arabidopsis thaliana protein match is: unknown protein (TAIR:AT5G48050.1); Has 648 Blast hits to 647 proteins in 29 species: Archae - 0; Bacteria - 0; Metazoa - 16; Fungi - 25; Plants - 607; Viruses - 0; Other Eukaryotes - 0 (source: NCBI BLink).	0.005	0.854	2	1	1	1	1	308	35.3	9.45	0	1	0	High	Peak Found	Peak Found	Peak Found	Peak Found	Peak Found
FALSE	High	Master Protein	AT3G20250.1	pumilio 5	0.005	0.852	1	1	1	1	1	961	106.9	5.96	0	1	0	Peak Found	Peak Found	Peak Found	Peak Found	High	High
FALSE	High	Master Protein	AT1G62040.1	Ubiquitin-like superfamily protein	0.005	0.851	13	1	1	1	1	119	13.7	8.88	0	1	0	High	Not Found	Peak Found	Peak Found	Not Found	Not Found
FALSE	High	Master Protein	AT1G15200.3	protein-protein interaction regulator family protein	0.005	0.841	4	1	1	1	1	470	54.4	6	0	1	0	Not Found	Not Found	High	High	Peak Found	Peak Found
FALSE	High	Master Protein	AT1G30380.1	photosystem I subunit K	0.005	0.829	7	1	2	1	1	130	13.2	10.51	0	1	0	High	Peak Found	High	High	Peak Found	Peak Found
FALSE	High	Master Protein	AT1G77840.1	Translation initiation factor IF2/IF5	0.005	0.808	4	1	1	1	1	437	48.6	5.59	0	1	0	High	Peak Found	Peak Found	Peak Found	Peak Found	Peak Found
FALSE	High	Master Protein	AT3G32980.1	Peroxidase superfamily protein	0.005	0.791	4	1	1	1	1	352	38.8	6.67	0	1	0	Not Found	High	Not Found	Not Found	Not Found	Not Found
FALSE	High	Master Protein	AT5G62390.1	BCL-2-associated athanogene 7	0.005	0.763	2	1	1	1	1	446	51.5	9.26	0	1	0	Not Found	Peak Found	High	High	Peak Found	Peak Found
FALSE	Medium	Master Protein	AT4G40000.1	S-adenosyl-L-methionine-dependent methyltransferases superfamily protein	0.015	0.751	3	1	1	1	1	783	88.1	6.92	0	1	0	High	Peak Found	Peak Found	Peak Found	Peak Found	Peak Found
